# Supplementary material for: Coral Thermometry Shows Exceptional 3˚C warming in the Subtropical North Pacific Over the Past Century
Source: Research Square preprint supplement (doi:10.21203/rs.3.rs-7414589/v1), 2025-10-12
Supplement: Supplementary file 1 [file 57e77cb1bc4df5eae0e2b734.xlsx]

## Sheet: scenario A
year	date	Makai Pier SST	Ko‘Olina SST
1908.58	1908-08-01	22.9435
1908.67	1908-09-01	24.2721
1908.75	1908-10-01	23.0733
1908.83	1908-11-01	22.8388
1908.92	1908-12-01	21.8648
1909	1909-01-01	21.3172
1909.08	1909-02-01	19.7231
1909.17	1909-03-01	20.178
1909.25	1909-04-01	21.3374
1909.33	1909-05-01	24.2679
1909.42	1909-06-01	23.7275
1909.5	1909-07-01	22.5466
1909.58	1909-08-01	22.7452
1909.67	1909-09-01	24.2877
1909.75	1909-10-01	23.1545
1909.83	1909-11-01	22.0317
1909.92	1909-12-01	20.0502
1910	1910-01-01	18.1336
1910.08	1910-02-01	17.2801
1910.17	1910-03-01	18.6179
1910.25	1910-04-01	19.665
1910.33	1910-05-01	20.4463
1910.42	1910-06-01	21.1936
1910.5	1910-07-01	21.2094
1910.58	1910-08-01	21.6583
1910.67	1910-09-01	21.2082
1910.75	1910-10-01	20.3123
1910.83	1910-11-01	21.0973
1910.92	1910-12-01	21.1435
1911	1911-01-01	20.0323
1911.08	1911-02-01	17.3364
1911.17	1911-03-01	17.4581
1911.25	1911-04-01	18.556
1911.33	1911-05-01	20.4594
1911.42	1911-06-01	21.5517
1911.5	1911-07-01	22.6088
1911.58	1911-08-01	24.229
1911.67	1911-09-01	24.8431
1911.75	1911-10-01	23.4095
1911.83	1911-11-01	23.5707
1911.92	1911-12-01	22.875
1912	1912-01-01	22.1297
1912.08	1912-02-01	19.3741
1912.17	1912-03-01	20.4413
1912.25	1912-04-01	21.5352
1912.33	1912-05-01	22.2995
1912.42	1912-06-01	22.8025
1912.5	1912-07-01	21.8388
1912.58	1912-08-01	23.1924
1912.67	1912-09-01	23.547
1912.75	1912-10-01	22.8786
1912.83	1912-11-01	22.6769
1912.92	1912-12-01	22.276
1913	1913-01-01	21.5295
1913.08	1913-02-01	20.3903
1913.17	1913-03-01	21.1145
1913.25	1913-04-01	22.0028
1913.33	1913-05-01	22.9443
1913.42	1913-06-01	23.8775
1913.5	1913-07-01	24.7172
1913.58	1913-08-01	25.3811
1913.67	1913-09-01	24.9228
1913.75	1913-10-01	23.9532
1913.83	1913-11-01	24.2234
1913.92	1913-12-01	23.3599
1914	1914-01-01	20.4422
1914.08	1914-02-01	19.8087
1914.17	1914-03-01	20.7454
1914.25	1914-04-01	20.4299
1914.33	1914-05-01	20.962
1914.42	1914-06-01	20.9095
1914.5	1914-07-01	22.2643
1914.58	1914-08-01	23.5938
1914.67	1914-09-01	23.1308
1914.75	1914-10-01	22.9776
1914.83	1914-11-01	22.8168
1914.92	1914-12-01	21.0843
1915	1915-01-01	20.948
1915.08	1915-02-01	19.3867
1915.17	1915-03-01	20.8609
1915.25	1915-04-01	22.6782
1915.33	1915-05-01	23.4722
1915.42	1915-06-01	23.5397
1915.5	1915-07-01	23.3954
1915.58	1915-08-01	23.7077
1915.67	1915-09-01	22.8417
1915.75	1915-10-01	22.7594
1915.83	1915-11-01	21.9481
1915.92	1915-12-01	20.7969
1916	1916-01-01	20.189
1916.08	1916-02-01	19.555
1916.17	1916-03-01	20.1443
1916.25	1916-04-01	20.6505
1916.33	1916-05-01	21.5654
1916.42	1916-06-01	22.8763
1916.5	1916-07-01	23.4809
1916.58	1916-08-01	23.7558
1916.67	1916-09-01	22.5785
1916.75	1916-10-01	20.4249
1916.83	1916-11-01	19.937
1916.92	1916-12-01	19.5547
1917	1917-01-01	18.9774
1917.08	1917-02-01	18.2607
1917.17	1917-03-01	19.0148
1917.25	1917-04-01	19.6352
1917.33	1917-05-01	20.2225
1917.42	1917-06-01	20.7582
1917.5	1917-07-01	20.4909
1917.58	1917-08-01	20.7178
1917.67	1917-09-01	20.6198
1917.75	1917-10-01	19.3778
1917.83	1917-11-01	19.3745
1917.92	1917-12-01	20.1316
1918	1918-01-01	19.8948
1918.08	1918-02-01	17.5032
1918.17	1918-03-01	17.5601
1918.25	1918-04-01
1918.33	1918-05-01
1918.42	1918-06-01
1918.5	1918-07-01
1918.58	1918-08-01
1918.67	1918-09-01
1918.75	1918-10-01
1918.83	1918-11-01
1918.92	1918-12-01
1919	1919-01-01
1919.08	1919-02-01	18.2455
1919.17	1919-03-01	19.9486
1919.25	1919-04-01	19.3885
1919.33	1919-05-01	19.7855
1919.42	1919-06-01	21.3756
1919.5	1919-07-01	22.0403
1919.58	1919-08-01	22.034
1919.67	1919-09-01	21.9893
1919.75	1919-10-01	21.6291
1919.83	1919-11-01	21.5183
1919.92	1919-12-01	21.5745
1920	1920-01-01	21.2328
1920.08	1920-02-01	20.1261
1920.17	1920-03-01	21.0719
1920.25	1920-04-01	21.1787
1920.33	1920-05-01	22.2074
1920.42	1920-06-01	21.9293
1920.5	1920-07-01	21.9646
1920.58	1920-08-01	22.7527
1920.67	1920-09-01	23.5904
1920.75	1920-10-01	23.0663
1920.83	1920-11-01	22.5247
1920.92	1920-12-01	22.0005
1921	1921-01-01	21.4589
1921.08	1921-02-01	20.9173
1921.17	1921-03-01	21.4192
1921.25	1921-04-01	22.6509
1921.33	1921-05-01	22.7788
1921.42	1921-06-01	23.4722
1921.5	1921-07-01	23.3908
1921.58	1921-08-01	24.2298
1921.67	1921-09-01	23.8417
1921.75	1921-10-01	22.738
1921.83	1921-11-01	21.4449
1921.92	1921-12-01	20.5786
1922	1922-01-01	18.3502
1922.08	1922-02-01
1922.17	1922-03-01	19.006
1922.25	1922-04-01	19.8668
1922.33	1922-05-01	19.6134
1922.42	1922-06-01	21.2159
1922.5	1922-07-01	21.2567
1922.58	1922-08-01	21.4464
1922.67	1922-09-01	21.4106
1922.75	1922-10-01	21.5679
1922.83	1922-11-01	21.6428
1922.92	1922-12-01	20.8032
1923	1923-01-01	20.245
1923.08	1923-02-01	18.2243
1923.17	1923-03-01	19.2424
1923.25	1923-04-01	20.259
1923.33	1923-05-01	21.1164
1923.42	1923-06-01	23.323
1923.5	1923-07-01	23.5564
1923.58	1923-08-01	23.5413
1923.67	1923-09-01	23.681
1923.75	1923-10-01	23.4677
1923.83	1923-11-01	21.0044
1923.92	1923-12-01	20.8711
1924	1924-01-01	20.3569
1924.08	1924-02-01	20.0618
1924.17	1924-03-01	21.2659
1924.25	1924-04-01	22.5531
1924.33	1924-05-01	23.0806
1924.42	1924-06-01	23.4654
1924.5	1924-07-01	23.6202
1924.58	1924-08-01	23.6733
1924.67	1924-09-01	23.687
1924.75	1924-10-01	23.609
1924.83	1924-11-01	23.1785
1924.92	1924-12-01	22.406
1925	1925-01-01	21.187
1925.08	1925-02-01	19.4447
1925.17	1925-03-01	19.6016
1925.25	1925-04-01	19.7
1925.33	1925-05-01	19.6478
1925.42	1925-06-01	19.8882
1925.5	1925-07-01	20.4078
1925.58	1925-08-01	22.2416
1925.67	1925-09-01	21.5576
1925.75	1925-10-01	20.203
1925.83	1925-11-01	19.4407
1925.92	1925-12-01	20.9216
1926	1926-01-01	20.5028
1926.08	1926-02-01	17.956
1926.17	1926-03-01	19.3899
1926.25	1926-04-01	20.9627
1926.33	1926-05-01	22.7778
1926.42	1926-06-01	23.0664
1926.5	1926-07-01	24.3018
1926.58	1926-08-01	24.6827
1926.67	1926-09-01	25.2479
1926.75	1926-10-01	25.1551
1926.83	1926-11-01	24.1372
1926.92	1926-12-01	23.9123
1927	1927-01-01	22.1978
1927.08	1927-02-01	21.0691
1927.17	1927-03-01	23.5717
1927.25	1927-04-01	23.4055
1927.33	1927-05-01	23.007
1927.42	1927-06-01	23.8044
1927.5	1927-07-01	23.5256
1927.58	1927-08-01	23.9619
1927.67	1927-09-01	23.8031
1927.75	1927-10-01	23.5462
1927.83	1927-11-01	23.8999
1927.92	1927-12-01	23.8066
1928	1928-01-01	22.0625
1928.08	1928-02-01	21.2783
1928.17	1928-03-01	21.5844
1928.25	1928-04-01	21.7754
1928.33	1928-05-01	22.156
1928.42	1928-06-01	24.1725
1928.5	1928-07-01	24.2287
1928.58	1928-08-01	25.4698
1928.67	1928-09-01	24.7251
1928.75	1928-10-01	22.7962
1928.83	1928-11-01	22.3595
1928.92	1928-12-01	22.4773
1929	1929-01-01	22.1595
1929.08	1929-02-01	20.9059
1929.17	1929-03-01	22.6066
1929.25	1929-04-01	23.9799
1929.33	1929-05-01	24.0073
1929.42	1929-06-01	25.5929
1929.5	1929-07-01	25.4418
1929.58	1929-08-01	26.3138
1929.67	1929-09-01	25.2226
1929.75	1929-10-01	25.681
1929.83	1929-11-01	24.099
1929.92	1929-12-01	23.4597
1930	1930-01-01	21.6954
1930.08	1930-02-01	19.3582
1930.17	1930-03-01	19.62
1930.25	1930-04-01	20.3928
1930.33	1930-05-01	21.5629
1930.42	1930-06-01	22.6155
1930.5	1930-07-01	24.0589
1930.58	1930-08-01	24.8762
1930.67	1930-09-01	23.75
1930.75	1930-10-01	23.8945
1930.83	1930-11-01	24.0115
1930.92	1930-12-01	22.9497
1931	1931-01-01	21.0878
1931.08	1931-02-01	18.0371
1931.17	1931-03-01	20.0192
1931.25	1931-04-01	21.4202
1931.33	1931-05-01	22.4356
1931.42	1931-06-01	22.9281
1931.5	1931-07-01	22.9024
1931.58	1931-08-01	22.8937
1931.67	1931-09-01	22.8101
1931.75	1931-10-01	21.7716
1931.83	1931-11-01	20.8024
1931.92	1931-12-01	19.7687
1932	1932-01-01	18.5176
1932.08	1932-02-01	17.8992
1932.17	1932-03-01	19.7347
1932.25	1932-04-01	20.7549
1932.33	1932-05-01	21.6773
1932.42	1932-06-01	23.0633
1932.5	1932-07-01	22.8848
1932.58	1932-08-01	23.0672
1932.67	1932-09-01	22.7313
1932.75	1932-10-01	21.5297
1932.83	1932-11-01	19.3818
1932.92	1932-12-01	17.2308
1933	1933-01-01	17.6422
1933.08	1933-02-01	16.3587
1933.17	1933-03-01	16.878
1933.25	1933-04-01	17.4531
1933.33	1933-05-01	17.8178
1933.42	1933-06-01	18.1452
1933.5	1933-07-01	19.2846
1933.58	1933-08-01	20.8869
1933.67	1933-09-01	20.9266
1933.75	1933-10-01	20.2121
1933.83	1933-11-01	19.7717
1933.92	1933-12-01	18.692
1934	1934-01-01	18.0277
1934.08	1934-02-01	17.9606
1934.17	1934-03-01	18.1842
1934.25	1934-04-01	18.4576
1934.33	1934-05-01	19.2628
1934.42	1934-06-01	21.0635
1934.5	1934-07-01	23.0618
1934.58	1934-08-01	23.9864
1934.67	1934-09-01	23.5537
1934.75	1934-10-01	21.9601
1934.83	1934-11-01	20.9035
1934.92	1934-12-01	19.1653
1935	1935-01-01	17.885
1935.08	1935-02-01	16.687
1935.17	1935-03-01	18.2781
1935.25	1935-04-01	17.8324
1935.33	1935-05-01	19.4573
1935.42	1935-06-01	19.4148
1935.5	1935-07-01	19.6095
1935.58	1935-08-01	21.1722
1935.67	1935-09-01	21.6427
1935.75	1935-10-01	21.3779
1935.83	1935-11-01	21.6312
1935.92	1935-12-01	21.1169
1936	1936-01-01	20.2747
1936.08	1936-02-01	19.1935
1936.17	1936-03-01	19.7633
1936.25	1936-04-01	19.6756
1936.33	1936-05-01	19.9946
1936.42	1936-06-01	21.7651
1936.5	1936-07-01	23.0374
1936.58	1936-08-01	24.5249
1936.67	1936-09-01	24.5047
1936.75	1936-10-01	25.2142
1936.83	1936-11-01	22.9255
1936.92	1936-12-01
1937	1937-01-01
1937.08	1937-02-01
1937.17	1937-03-01
1937.25	1937-04-01	19.8965
1937.33	1937-05-01	22.4206
1937.42	1937-06-01	21.7192
1937.5	1937-07-01	22.7047
1937.58	1937-08-01	23.8103
1937.67	1937-09-01	24.3297
1937.75	1937-10-01	24.2654
1937.83	1937-11-01	23.8109
1937.92	1937-12-01	22.7489
1938	1938-01-01	21.2774
1938.08	1938-02-01	20.9585
1938.17	1938-03-01	21.3767
1938.25	1938-04-01	21.7115
1938.33	1938-05-01	21.7822
1938.42	1938-06-01	22.5641
1938.5	1938-07-01	23.5248
1938.58	1938-08-01	24.1116
1938.67	1938-09-01	24.1985
1938.75	1938-10-01	23.8972
1938.83	1938-11-01	23.661
1938.92	1938-12-01	24.0179
1939	1939-01-01	23.3582
1939.08	1939-02-01	20.6424
1939.17	1939-03-01	22.1337
1939.25	1939-04-01	21.4405
1939.33	1939-05-01	20.8712
1939.42	1939-06-01	20.8147
1939.5	1939-07-01	22.584
1939.58	1939-08-01	24.2346
1939.67	1939-09-01	24.6185
1939.75	1939-10-01	24.4127
1939.83	1939-11-01	24.576
1939.92	1939-12-01	21.9129
1940	1940-01-01	18.379
1940.08	1940-02-01
1940.17	1940-03-01
1940.25	1940-04-01	18.2752
1940.33	1940-05-01	20.5578
1940.42	1940-06-01	21.4599
1940.5	1940-07-01	24.1124
1940.58	1940-08-01	24.0203
1940.67	1940-09-01	26.7641
1940.75	1940-10-01	25.8203
1940.83	1940-11-01	26.2524
1940.92	1940-12-01	24.8293
1941	1941-01-01	23.4792
1941.08	1941-02-01	22.8551
1941.17	1941-03-01	22.9356
1941.25	1941-04-01	24.0043
1941.33	1941-05-01	25.0501
1941.42	1941-06-01	25.194
1941.5	1941-07-01	25.0934
1941.58	1941-08-01	25.8469
1941.67	1941-09-01	24.8327
1941.75	1941-10-01	25.6005
1941.83	1941-11-01	24.6106
1941.92	1941-12-01	21.4164
1942	1942-01-01	20.9314
1942.08	1942-02-01	19.8458
1942.17	1942-03-01	22.2163
1942.25	1942-04-01	22.593
1942.33	1942-05-01	23.042
1942.42	1942-06-01	23.718
1942.5	1942-07-01	25.4612
1942.58	1942-08-01	24.5542
1942.67	1942-09-01	23.9876
1942.75	1942-10-01	22.9478
1942.83	1942-11-01	22.8074
1942.92	1942-12-01	23.139
1943	1943-01-01	23.8198
1943.08	1943-02-01	22.373
1943.17	1943-03-01	22.8109
1943.25	1943-04-01	23.2957
1943.33	1943-05-01	24.0323
1943.42	1943-06-01	24.8626
1943.5	1943-07-01	25.5005
1943.58	1943-08-01	26.074
1943.67	1943-09-01	25.6861
1943.75	1943-10-01	24.7537
1943.83	1943-11-01	23.6673
1943.92	1943-12-01	23.0931
1944	1944-01-01
1944.08	1944-02-01
1944.17	1944-03-01
1944.25	1944-04-01
1944.33	1944-05-01
1944.42	1944-06-01	19.2552
1944.5	1944-07-01	20.9613
1944.58	1944-08-01	23.2347
1944.67	1944-09-01	22.394
1944.75	1944-10-01	21.563
1944.83	1944-11-01	21.5638
1944.92	1944-12-01	20.9164
1945	1945-01-01	20.7542
1945.08	1945-02-01	20.1861
1945.17	1945-03-01	21.1063
1945.25	1945-04-01	21.7271
1945.33	1945-05-01	23.6418
1945.42	1945-06-01	23.5731
1945.5	1945-07-01	22.4061
1945.58	1945-08-01	23.344
1945.67	1945-09-01	23.4768
1945.75	1945-10-01	21.7475
1945.83	1945-11-01	19.9606
1945.92	1945-12-01	19.0286
1946	1946-01-01	18.3161
1946.08	1946-02-01
1946.17	1946-03-01	19.4646
1946.25	1946-04-01	20.6678
1946.33	1946-05-01	21.6992
1946.42	1946-06-01	23.1393
1946.5	1946-07-01	22.7023
1946.58	1946-08-01	23.1569
1946.67	1946-09-01	22.7078
1946.75	1946-10-01	19.9001
1946.83	1946-11-01
1946.92	1946-12-01
1947	1947-01-01
1947.08	1947-02-01
1947.17	1947-03-01
1947.25	1947-04-01
1947.33	1947-05-01	19.5718
1947.42	1947-06-01	20.9746
1947.5	1947-07-01	20.4694
1947.58	1947-08-01	20.8484
1947.67	1947-09-01	21.0796
1947.75	1947-10-01
1947.83	1947-11-01
1947.92	1947-12-01
1948	1948-01-01
1948.08	1948-02-01
1948.17	1948-03-01
1948.25	1948-04-01
1948.33	1948-05-01
1948.42	1948-06-01	20.0886
1948.5	1948-07-01	21.8088
1948.58	1948-08-01	22.3332
1948.67	1948-09-01	22.0036
1948.75	1948-10-01	20.9827
1948.83	1948-11-01	20.8333
1948.92	1948-12-01	20.7452
1949	1949-01-01	20.1304
1949.08	1949-02-01	18.8041
1949.17	1949-03-01	20.1979
1949.25	1949-04-01	20.9272
1949.33	1949-05-01	19.3338
1949.42	1949-06-01	21.2823
1949.5	1949-07-01	24.5592
1949.58	1949-08-01	25.5884
1949.67	1949-09-01	25.0233
1949.75	1949-10-01	24.5307
1949.83	1949-11-01	23.4375
1949.92	1949-12-01	22.4063
1950	1950-01-01	21.8047
1950.08	1950-02-01	20.6775
1950.17	1950-03-01	22.3096
1950.25	1950-04-01	23.6772
1950.33	1950-05-01	23.4485
1950.42	1950-06-01	24.2431
1950.5	1950-07-01	23.0948
1950.58	1950-08-01	25.6003
1950.67	1950-09-01	25.0804
1950.75	1950-10-01	25.058
1950.83	1950-11-01	24.6451
1950.92	1950-12-01	22.7429
1951	1951-01-01	21.1486
1951.08	1951-02-01	20.6778
1951.17	1951-03-01	20.7691
1951.25	1951-04-01	21.0653
1951.33	1951-05-01	22.2766
1951.42	1951-06-01	23.545
1951.5	1951-07-01	24.3463
1951.58	1951-08-01	25.2062
1951.67	1951-09-01	24.8692
1951.75	1951-10-01	23.6893
1951.83	1951-11-01	22.8316
1951.92	1951-12-01	22.7498
1952	1952-01-01	20.3991
1952.08	1952-02-01	16.4036
1952.17	1952-03-01	19.561
1952.25	1952-04-01	19.6408
1952.33	1952-05-01	22.0337
1952.42	1952-06-01	21.9192
1952.5	1952-07-01	21.7233
1952.58	1952-08-01	23.0819
1952.67	1952-09-01	22.6319
1952.75	1952-10-01	21.4613
1952.83	1952-11-01	20.6544
1952.92	1952-12-01	19.967
1953	1953-01-01	20.0198
1953.08	1953-02-01	19.027
1953.17	1953-03-01	19.0951
1953.25	1953-04-01	19.6436
1953.33	1953-05-01	20.8659
1953.42	1953-06-01	21.5323
1953.5	1953-07-01	22.8311
1953.58	1953-08-01	24.4922
1953.67	1953-09-01	24.929
1953.75	1953-10-01	24.6174
1953.83	1953-11-01	23.7485
1953.92	1953-12-01	21.6631
1954	1954-01-01	20.7347
1954.08	1954-02-01	19.9986
1954.17	1954-03-01	21.798
1954.25	1954-04-01	21.6843
1954.33	1954-05-01	21.3957
1954.42	1954-06-01	22.4989
1954.5	1954-07-01	24.5176
1954.58	1954-08-01	24.8377
1954.67	1954-09-01	24.1993
1954.75	1954-10-01	23.4179
1954.83	1954-11-01	21.962
1954.92	1954-12-01	22.1387
1955	1955-01-01	19.3561
1955.08	1955-02-01	17.9784
1955.17	1955-03-01	19.048
1955.25	1955-04-01	21.3005
1955.33	1955-05-01	22.6757
1955.42	1955-06-01	24.4265
1955.5	1955-07-01	25.2912
1955.58	1955-08-01	25.4614
1955.67	1955-09-01	25.4361
1955.75	1955-10-01	24.6323
1955.83	1955-11-01	24.0481
1955.92	1955-12-01	23.183
1956	1956-01-01	22.0002
1956.08	1956-02-01	21.0316
1956.17	1956-03-01	21.5863
1956.25	1956-04-01	23.0583
1956.33	1956-05-01	22.2836
1956.42	1956-06-01	24.8588
1956.5	1956-07-01	26.037
1956.58	1956-08-01	26.4414
1956.67	1956-09-01	25.3385
1956.75	1956-10-01	25.0289
1956.83	1956-11-01	24.9295
1956.92	1956-12-01	22.0571
1957	1957-01-01	20.3811
1957.08	1957-02-01	19.2102	20.8237
1957.17	1957-03-01	21.0679	20.3485
1957.25	1957-04-01	22.0993	23.2475
1957.33	1957-05-01	24.1525	21.8801
1957.42	1957-06-01	24.8629	22.4029
1957.5	1957-07-01	25.4649	22.4986
1957.58	1957-08-01	26.1407	23.4639
1957.67	1957-09-01	25.7886	24.1493
1957.75	1957-10-01	24.8406	25.3823
1957.83	1957-11-01	24.5384	24.2902
1957.92	1957-12-01	23.3306	24.4583
1958	1958-01-01	21.4978	22.9479
1958.08	1958-02-01	21.1563	22.2641
1958.17	1958-03-01	21.2527	21.5354
1958.25	1958-04-01	21.44	22.0695
1958.33	1958-05-01	21.5532	23.3516
1958.42	1958-06-01	21.5495	22.9147
1958.5	1958-07-01	22.2407	23.2592
1958.58	1958-08-01	24.7335	24.3081
1958.67	1958-09-01	25.6342	23.9254
1958.75	1958-10-01	25.5456	24.196
1958.83	1958-11-01	24.9827	23.9669
1958.92	1958-12-01	23.8564	24.9124
1959	1959-01-01	22.4474	23.693
1959.08	1959-02-01	22.411	23.0143
1959.17	1959-03-01	23.4432	20.5145
1959.25	1959-04-01	23.118	20.4709
1959.33	1959-05-01	23.5473	20.792
1959.42	1959-06-01	23.7882	23.1482
1959.5	1959-07-01	24.7205	23.8377
1959.58	1959-08-01	24.8475	24.1205
1959.67	1959-09-01	24.9267	24.495
1959.75	1959-10-01	24.8257	24.7541
1959.83	1959-11-01	24.2212	22.3193
1959.92	1959-12-01	22.8126	22.4806
1960	1960-01-01	22.0181	21.6934
1960.08	1960-02-01	21.9555	20.0228
1960.17	1960-03-01	22.0761	19.1869
1960.25	1960-04-01	22.2768	19.8728
1960.33	1960-05-01	22.9111	20.9256
1960.42	1960-06-01	24.0798	23.2495
1960.5	1960-07-01	24.3934	23.8012
1960.58	1960-08-01	25.2819	24.6694
1960.67	1960-09-01	25.2321	25.5479
1960.75	1960-10-01	25.2476	25.4824
1960.83	1960-11-01	23.4701	24.7376
1960.92	1960-12-01	24.269	23.1969
1961	1961-01-01	22.4485	22.5164
1961.08	1961-02-01	21.9462	21.4353
1961.17	1961-03-01	22.0264	20.1632
1961.25	1961-04-01	22.0586	20.9153
1961.33	1961-05-01	22.5369	23.0344
1961.42	1961-06-01	25.4022	23.2688
1961.5	1961-07-01	25.7851	24.0068
1961.58	1961-08-01	25.8188	23.3135
1961.67	1961-09-01	25.6363	24.4224
1961.75	1961-10-01	25.2729	25.4932
1961.83	1961-11-01	24.7801	24.9683
1961.92	1961-12-01	23.7629	24.6895
1962	1962-01-01	24.1036	22.9345
1962.08	1962-02-01	21.3881	20.343
1962.17	1962-03-01	22.6128	19.1636
1962.25	1962-04-01	23.4027	19.0812
1962.33	1962-05-01	24.5331	19.6836
1962.42	1962-06-01	25.3739	20.1359
1962.5	1962-07-01	25.6226	21.9991
1962.58	1962-08-01	25.8262	24.4424
1962.67	1962-09-01	25.4407	24.1736
1962.75	1962-10-01	25.2029	25.1564
1962.83	1962-11-01	23.8231	24.93
1962.92	1962-12-01	22.0146	22.1326
1963	1963-01-01	22.2203	21.3218
1963.08	1963-02-01	20.5581	21.6111
1963.17	1963-03-01	23.173	21.3945
1963.25	1963-04-01	24.4924	22.777
1963.33	1963-05-01	24.8482	24.9533
1963.42	1963-06-01	25.4431	24.113
1963.5	1963-07-01	25.4642	25.0612
1963.58	1963-08-01	26.5063	25.9691
1963.67	1963-09-01	26.2143	26.5955
1963.75	1963-10-01	25.6493	26.6045
1963.83	1963-11-01	24.0812	25.4239
1963.92	1963-12-01	20.7222	25.98
1964	1964-01-01	20.3233	26.0377
1964.08	1964-02-01	20.1919	23.4199
1964.17	1964-03-01	21.3984	22.2777
1964.25	1964-04-01	20.8269	22.979
1964.33	1964-05-01	23.7283	22.2807
1964.42	1964-06-01	25.1221	22.303
1964.5	1964-07-01	25.1969	22.8871
1964.58	1964-08-01	25.4502	23.4612
1964.67	1964-09-01	24.8635	24.8579
1964.75	1964-10-01	23.4753	24.8323
1964.83	1964-11-01	22.4404	25.6035
1964.92	1964-12-01	20.1672	25.499
1965	1965-01-01	20.2235	23.6213
1965.08	1965-02-01	19.4867	23.8128
1965.17	1965-03-01	20.4759	20.8376
1965.25	1965-04-01	22.3483	21.8219
1965.33	1965-05-01	23.9629	22.5183
1965.42	1965-06-01	25.1752	24.5727
1965.5	1965-07-01	24.8808	25.6127
1965.58	1965-08-01	25.7874	25.5678
1965.67	1965-09-01	25.9877	26.5537
1965.75	1965-10-01	25.1587	26.7548
1965.83	1965-11-01	24.422	26.3256
1965.92	1965-12-01	23.8615	22.7094
1966	1966-01-01	22.9052	21.7281
1966.08	1966-02-01	21.2279	23.2403
1966.17	1966-03-01	21.8368	20.3178
1966.25	1966-04-01	22.2338	21.4603
1966.33	1966-05-01	22.0711	21.2391
1966.42	1966-06-01	22.8293	21.8343
1966.5	1966-07-01	23.8038	22.9605
1966.58	1966-08-01	24.0917	24.1645
1966.67	1966-09-01	24.2005	23.6612
1966.75	1966-10-01	23.974	25.5127
1966.83	1966-11-01	22.6325	26.1948
1966.92	1966-12-01	22.3924	24.2977
1967	1967-01-01	22.0162	21.474
1967.08	1967-02-01	20.8584	23.2782
1967.17	1967-03-01	21.1705	21.0621
1967.25	1967-04-01	21.7138	21.5805
1967.33	1967-05-01	22.63	21.3609
1967.42	1967-06-01	23.1356	22.8499
1967.5	1967-07-01	23.4959	24.6755
1967.58	1967-08-01	24.1047	24.6502
1967.67	1967-09-01	23.9531	25.8971
1967.75	1967-10-01	21.2064	25.3004
1967.83	1967-11-01	23.4988	22.6329
1967.92	1967-12-01	20.1695	23.5849
1968	1968-01-01	19.6597	23.4845
1968.08	1968-02-01	18.2861	22.2774
1968.17	1968-03-01	19.8551	20.4497
1968.25	1968-04-01	22.3251	21.574
1968.33	1968-05-01	21.2423	22.2495
1968.42	1968-06-01	22.6169	24.9756
1968.5	1968-07-01	24.3765	24.1812
1968.58	1968-08-01	24.1454	24.9105
1968.67	1968-09-01	24.3455	24.4646
1968.75	1968-10-01	24.0679	25.4679
1968.83	1968-11-01	23.7493	24.9709
1968.92	1968-12-01	23.6924	23.1817
1969	1969-01-01	23.6999	21.6147
1969.08	1969-02-01	22.7043	21.7552
1969.17	1969-03-01	24.2897	19.9578
1969.25	1969-04-01	24.0812	21.7281
1969.33	1969-05-01	24.2642	22.2738
1969.42	1969-06-01	24.4581	23.4132
1969.5	1969-07-01	24.1649	23.0659
1969.58	1969-08-01	25.138	25.2183
1969.67	1969-09-01	24.4598	25.1458
1969.75	1969-10-01	24.9011	25.8548
1969.83	1969-11-01	22.2735	25.2815
1969.92	1969-12-01	22.4862	24.2433
1970	1970-01-01	22.7456	18.0472
1970.08	1970-02-01	19.4502	20.7004
1970.17	1970-03-01	19.7437	18.4866
1970.25	1970-04-01	20.2195	19.1532
1970.33	1970-05-01	20.4741	20.8016
1970.42	1970-06-01	22.508	21.4435
1970.5	1970-07-01	23.9947	21.1571
1970.58	1970-08-01	25.0358	21.9226
1970.67	1970-09-01	23.6719	24.038
1970.75	1970-10-01	24.0182	23.7476
1970.83	1970-11-01	23.3631	19.9908
1970.92	1970-12-01	21.6392	21.271
1971	1971-01-01	22.4328	19.4558
1971.08	1971-02-01	21.1664	20.1366
1971.17	1971-03-01	21.3774	19.1166
1971.25	1971-04-01	22.1231	20.4234
1971.33	1971-05-01	21.6846	22.7249
1971.42	1971-06-01	22.2402	23.8161
1971.5	1971-07-01	22.7019	24.0873
1971.58	1971-08-01	24.8151	25.2628
1971.67	1971-09-01	24.8308	25.9403
1971.75	1971-10-01	23.8502	26.1084
1971.83	1971-11-01	22.6268	24.3367
1971.92	1971-12-01	23.048	25.1252
1972	1972-01-01	22.0487	23.9577
1972.08	1972-02-01	20.3438	22.7742
1972.17	1972-03-01	20.7528	20.5261
1972.25	1972-04-01	21.0529	20.6059
1972.33	1972-05-01	22.3297	23.0399
1972.42	1972-06-01	24.0838	22.9678
1972.5	1972-07-01	24.2814	23.2913
1972.58	1972-08-01	24.5419	24.0985
1972.67	1972-09-01	24.8456	24.416
1972.75	1972-10-01	24.5533	24.5228
1972.83	1972-11-01	23.6601	22.8234
1972.92	1972-12-01	22.5843	21.9554
1973	1973-01-01	20.746	19.2489
1973.08	1973-02-01	20.1963	18.9158
1973.17	1973-03-01	20.9806	18.468
1973.25	1973-04-01	20.974	19.3687
1973.33	1973-05-01	22.5118	20.2416
1973.42	1973-06-01	24.2164	20.1261
1973.5	1973-07-01	24.0538	21.9885
1973.58	1973-08-01	25.0224	23.047
1973.67	1973-09-01	25.3869	24.7567
1973.75	1973-10-01	24.8002	25.3809
1973.83	1973-11-01	23.9856	23.7405
1973.92	1973-12-01	23.6334	22.0968
1974	1974-01-01	23.1882	20.0819
1974.08	1974-02-01	22.4191	19.8273
1974.17	1974-03-01	23.3569	19.4185
1974.25	1974-04-01	23.4393	19.8074
1974.33	1974-05-01	24.4058	20.205
1974.42	1974-06-01	24.8189	22.1226
1974.5	1974-07-01	24.406	24.071
1974.58	1974-08-01	25.2531	25.6246
1974.67	1974-09-01	23.9862	24.8132
1974.75	1974-10-01	24.8178	26.1562
1974.83	1974-11-01	23.5597	24.937
1974.92	1974-12-01	22.4955	24.5976
1975	1975-01-01	21.6942	22.528
1975.08	1975-02-01	21.2686	20.8779
1975.17	1975-03-01	22.0171	20.3059
1975.25	1975-04-01	23.0065	21.8421
1975.33	1975-05-01	23.6841	22.1817
1975.42	1975-06-01	23.7453	22.9041
1975.5	1975-07-01	23.922	25.0232
1975.58	1975-08-01	24.1481	24.4692
1975.67	1975-09-01	24.0929	24.4423
1975.75	1975-10-01	23.2814	24.6606
1975.83	1975-11-01	22.8117	23.9523
1975.92	1975-12-01	21.7016	24.4312
1976	1976-01-01	19.8383	21.762
1976.08	1976-02-01	19.4148	19.8355
1976.17	1976-03-01	21.0715	18.9087
1976.25	1976-04-01	21.771	19.4832
1976.33	1976-05-01	24.7182	20.2731
1976.42	1976-06-01	25.5431	22.7126
1976.5	1976-07-01	25.8928	26.4818
1976.58	1976-08-01	28.1999	25.3462
1976.67	1976-09-01	25.9792	26.7652
1976.75	1976-10-01	23.1762	26.6677
1976.83	1976-11-01	23.1985	24.9539
1976.92	1976-12-01	22.9888	23.6793
1977	1977-01-01	22.5392	22.4986
1977.08	1977-02-01	21.7097	21.3093
1977.17	1977-03-01	22.0052	22.2453
1977.25	1977-04-01	22.3091	24.1
1977.33	1977-05-01	22.5574	22.99
1977.42	1977-06-01	23.3357	24.088
1977.5	1977-07-01	24.2685	24.5351
1977.58	1977-08-01	25.1508	26.1847
1977.67	1977-09-01	24.513	24.5018
1977.75	1977-10-01	23.8682	26.2553
1977.83	1977-11-01	24.6549	25.3361
1977.92	1977-12-01	25.0854	26.0497
1978	1978-01-01	21.5061	25.9489
1978.08	1978-02-01	20.97	24.8301
1978.17	1978-03-01	21.801	23.3665
1978.25	1978-04-01	21.3284	25.743
1978.33	1978-05-01	22.4118	24.4531
1978.42	1978-06-01	23.6077	24.9822
1978.5	1978-07-01	24.9749	25.8054
1978.58	1978-08-01	25.6354	26.2181
1978.67	1978-09-01	25.4276	25.2568
1978.75	1978-10-01	23.2168	26.5984
1978.83	1978-11-01	23.4538	26.114
1978.92	1978-12-01	22.1538	25.2376
1979	1979-01-01	20.881	25.1131
1979.08	1979-02-01	20.341	25.4085
1979.17	1979-03-01	21.1996	25.0075
1979.25	1979-04-01	20.8262	25.172
1979.33	1979-05-01	21.3705	26.5444
1979.42	1979-06-01	23.9083	25.8983
1979.5	1979-07-01	25.0615	26.27
1979.58	1979-08-01	26.1744	26.5304
1979.67	1979-09-01	26.3126	26.9616
1979.75	1979-10-01	25.7843	28.1008
1979.83	1979-11-01	25.1319	27.7462
1979.92	1979-12-01	23.5173	26.6777
1980	1980-01-01	21.0217	25.8529
1980.08	1980-02-01	20.1027	22.9336
1980.17	1980-03-01	21.1791	22.5196
1980.25	1980-04-01	22.4911	22.5781
1980.33	1980-05-01	22.4196	22.3149
1980.42	1980-06-01	24.5362	22.7963
1980.5	1980-07-01	23.763	25.3228
1980.58	1980-08-01	25.0572	25.9621
1980.67	1980-09-01	25.0115	26.2535
1980.75	1980-10-01	22.3484	26.3884
1980.83	1980-11-01	22.8059	27.0599
1980.92	1980-12-01	21.7933	25.968
1981	1981-01-01	21.6582	24.6778
1981.08	1981-02-01	20.6967	21.5224
1981.17	1981-03-01	21.2338	21.1993
1981.25	1981-04-01	22.4247	21.5792
1981.33	1981-05-01	23.0902	22.4929
1981.42	1981-06-01	24.6267	24.0698
1981.5	1981-07-01	24.9671	24.5445
1981.58	1981-08-01	26.3291	26.2649
1981.67	1981-09-01	25.5221	25.2594
1981.75	1981-10-01	24.2989	25.5132
1981.83	1981-11-01	23.1417	24.0449
1981.92	1981-12-01	22.8662	23.1944
1982	1982-01-01	21.6074	22.7803
1982.08	1982-02-01	21.2125	21.5844
1982.17	1982-03-01	21.5969	20.9568
1982.25	1982-04-01	21.6866	20.6109
1982.33	1982-05-01	21.5725	21.854
1982.42	1982-06-01	23.9025	23.7535
1982.5	1982-07-01	23.6437	25.8077
1982.58	1982-08-01	24.8303	26.2202
1982.67	1982-09-01	26.0826	26.2429
1982.75	1982-10-01	24.531	24.4378
1982.83	1982-11-01	23.775	23.7438
1982.92	1982-12-01	22.3134	20.5765
1983	1983-01-01	22.2739	20.9082
1983.08	1983-02-01	21.6624	21.0112
1983.17	1983-03-01	22.6119	20.6713
1983.25	1983-04-01	23.3529	20.8681
1983.33	1983-05-01	23.4576	21.3257
1983.42	1983-06-01	23.6504	21.5576
1983.5	1983-07-01	23.8578	23.616
1983.58	1983-08-01	23.9977	24.9976
1983.67	1983-09-01	23.7605	25.7687
1983.75	1983-10-01	23.2935	26.7451
1983.83	1983-11-01	23.4898	26.9127
1983.92	1983-12-01	23.3515	21.8665
1984	1984-01-01	23.0333	20.0844
1984.08	1984-02-01	22.0895	21.0401
1984.17	1984-03-01	22.8886	21.2814
1984.25	1984-04-01	22.4468	20.5194
1984.33	1984-05-01	22.952	24.6001
1984.42	1984-06-01	24.1049	27.5476
1984.5	1984-07-01	25.0044	25.3596
1984.58	1984-08-01	26.3213	27.8187
1984.67	1984-09-01	26.6291	27.2646
1984.75	1984-10-01	25.7484	28.6242
1984.83	1984-11-01	26.3169	25.8122
1984.92	1984-12-01	25.6439	24.5685
1985	1985-01-01	21.402	24.9249
1985.08	1985-02-01	20.4019	22.9345
1985.17	1985-03-01	22.4081	23.9202
1985.25	1985-04-01	21.0742	22.2242
1985.33	1985-05-01	21.2057	22.8923
1985.42	1985-06-01	21.1034	23.847
1985.5	1985-07-01	22.5141	22.2712
1985.58	1985-08-01	26.313	24.7183
1985.67	1985-09-01	26.1992	26.1633
1985.75	1985-10-01	26.0446	24.5068
1985.83	1985-11-01	25.3213	23.9539
1985.92	1985-12-01	22.0847	24.6759
1986	1986-01-01	20.8626	23.3491
1986.08	1986-02-01	20.5659	23.2221
1986.17	1986-03-01	21.4895	21.3868
1986.25	1986-04-01	21.8926	21.7522
1986.33	1986-05-01	23.8376	22.1664
1986.42	1986-06-01	25.7929	23.4825
1986.5	1986-07-01	26.1527	25.2051
1986.58	1986-08-01	26.5125	27.6851
1986.67	1986-09-01	27.6881	27.3299
1986.75	1986-10-01	27.5714	27.4308
1986.83	1986-11-01	26.0638	26.8529
1986.92	1986-12-01	23.9738	25.8766
1987	1987-01-01	24.1024	26.3025
1987.08	1987-02-01	22.5267	24.4897
1987.17	1987-03-01	22.9274	24.0901
1987.25	1987-04-01	23.0672	21.2023
1987.33	1987-05-01	23.0987	22.742
1987.42	1987-06-01	24.2447	24.1532
1987.5	1987-07-01	27.1181	24.2421
1987.58	1987-08-01	27.9474	24.6915
1987.67	1987-09-01	27.813	24.864
1987.75	1987-10-01	26.8172	24.8924
1987.83	1987-11-01	26.4482	23.7776
1987.92	1987-12-01	24.7189	24.2633
1988	1988-01-01	23.277	22.631
1988.08	1988-02-01	22.7893	19.9832
1988.17	1988-03-01	23.2528	22.825
1988.25	1988-04-01	23.1054	21.8219
1988.33	1988-05-01	24.3943	23.2312
1988.42	1988-06-01	26.4716	21.5256
1988.5	1988-07-01	26.6149	23.7914
1988.58	1988-08-01	27.4642	24.4113
1988.67	1988-09-01	27.5184	24.2397
1988.75	1988-10-01	26.8644	25.2136
1988.83	1988-11-01	25.497	23.9893
1988.92	1988-12-01	24.3966	22.9463
1989	1989-01-01	22.9266	22.5684
1989.08	1989-02-01	21.651	21.3764
1989.17	1989-03-01	21.7314	20.476
1989.25	1989-04-01	22.0037	21.2109
1989.33	1989-05-01	23.7285	20.4324
1989.42	1989-06-01	26.1634	19.9685
1989.5	1989-07-01	26.6222	20.4108
1989.58	1989-08-01	26.6609	21.2359
1989.67	1989-09-01	26.2525	23.3271
1989.75	1989-10-01	25.8715	24.6047
1989.83	1989-11-01	24.8507	23.7308
1989.92	1989-12-01	22.1215	23.9566
1990	1990-01-01	22.8619	22.236
1990.08	1990-02-01	21.8606	23.1584
1990.17	1990-03-01	23.2076	21.0835
1990.25	1990-04-01	25.0838	21.487
1990.33	1990-05-01	26.1818	21.1471
1990.42	1990-06-01	25.7611	21.6534
1990.5	1990-07-01	26.1791	22.7378
1990.58	1990-08-01	26.9864	22.8496
1990.67	1990-09-01	27.2777	23.2418
1990.75	1990-10-01	26.504	25.2042
1990.83	1990-11-01	24.1681	26.2232
1990.92	1990-12-01	23.5347	26.9752
1991	1991-01-01	22.5055	25.79
1991.08	1991-02-01	21.7054	26.6075
1991.17	1991-03-01	22.0382	22.5334
1991.25	1991-04-01	23.631	21.7062
1991.33	1991-05-01	27.2971	23.0313
1991.42	1991-06-01	26.1322	23.504
1991.5	1991-07-01	26.8919	25.1408
1991.58	1991-08-01	25.6783	24.9494
1991.67	1991-09-01	27.0687	25.1753
1991.75	1991-10-01	22.8797	25.7209
1991.83	1991-11-01	22.5771	24.6631
1991.92	1991-12-01	21.9895	24.207
1992	1992-01-01	21.31	21.4908
1992.08	1992-02-01	20.665	20.8568
1992.17	1992-03-01	21.0338	20.4613
1992.25	1992-04-01	23.1494	20.6472
1992.33	1992-05-01	26.7393	21.58
1992.42	1992-06-01	26.8564	21.7548
1992.5	1992-07-01	27.4502	22.3864
1992.58	1992-08-01	28.1182	23.5121
1992.67	1992-09-01	26.5138	24.6201
1992.75	1992-10-01	27.2195	24.9418
1992.83	1992-11-01	24.7205	23.2329
1992.92	1992-12-01	22.7	23.1479
1993	1993-01-01	21.7458	23.5674
1993.08	1993-02-01	21.5556	20.9522
1993.17	1993-03-01	22.2585	20.0968
1993.25	1993-04-01	23.3774	18.8433
1993.33	1993-05-01	24.6332	20.3357
1993.42	1993-06-01	25.8062	20.8553
1993.5	1993-07-01	25.9494	22.0661
1993.58	1993-08-01	26.418	23.3481
1993.67	1993-09-01	26.578	23.5154
1993.75	1993-10-01	25.9077	24.5792
1993.83	1993-11-01	23.9881	23.3253
1993.92	1993-12-01	21.6242	22.8818
1994	1994-01-01	21.4772	23.155
1994.08	1994-02-01	20.9775	21.4034
1994.17	1994-03-01	22.1907	21.9201
1994.25	1994-04-01	22.6369	20.2699
1994.33	1994-05-01	24.2267	20.555
1994.42	1994-06-01	26.3331	22.4669
1994.5	1994-07-01	26.9041	24.5628
1994.58	1994-08-01	26.7755	25.508
1994.67	1994-09-01	26.9034	25.5771
1994.75	1994-10-01	24.366	26.6888
1994.83	1994-11-01	22.3641	24.0735
1994.92	1994-12-01	20.007	23.691
1995	1995-01-01	19.5156	24.0386
1995.08	1995-02-01	18.1811	20.9267
1995.17	1995-03-01	21.5961	23.4788
1995.25	1995-04-01	21.2469	21.0214
1995.33	1995-05-01	21.8992	23.6268
1995.42	1995-06-01	21.1841	23.7519
1995.5	1995-07-01	23.1568	23.8548
1995.58	1995-08-01	25.7659	26.2121
1995.67	1995-09-01	25.959	25.998
1995.75	1995-10-01	25.5947	25.2479
1995.83	1995-11-01	25.8883	26.7088
1995.92	1995-12-01	22.8666	25.0734
1996	1996-01-01	23.8489	25.344
1996.08	1996-02-01	21.5961	24.2042
1996.17	1996-03-01	24.4539	20.7257
1996.25	1996-04-01	22.3895	22.9534
1996.33	1996-05-01	21.8073	24.153
1996.42	1996-06-01	23.0862	24.7661
1996.5	1996-07-01	26.2887	24.9867
1996.58	1996-08-01	26.5604	24.9015
1996.67	1996-09-01	26.197	26.4393
1996.75	1996-10-01	23.0817	26.1709
1996.83	1996-11-01	22.4842	25.6608
1996.92	1996-12-01	22.6485	24.1908
1997	1997-01-01	22.4383	21.1709
1997.08	1997-02-01	22.3434	22.168
1997.17	1997-03-01	22.5165	22.6036
1997.25	1997-04-01	23.7009	21.9344
1997.33	1997-05-01	25.1945	23.6746
1997.42	1997-06-01	26.6121	23.8698
1997.5	1997-07-01	27.1816	24.7246
1997.58	1997-08-01	27.7577	24.9842
1997.67	1997-09-01	26.9096	24.7929
1997.75	1997-10-01	26.7527	24.0965
1997.83	1997-11-01	26.1191	24.5458
1997.92	1997-12-01	22.2506	24.1204
1998	1998-01-01	23.7355	22.6357
1998.08	1998-02-01	21.3668	22.538
1998.17	1998-03-01	21.6246	22.0392
1998.25	1998-04-01	21.9102	21.56
1998.33	1998-05-01	22.9066	20.4337
1998.42	1998-06-01	24.1223	21.8136
1998.5	1998-07-01	25.0213	24.8155
1998.58	1998-08-01	25.8069	24.9599
1998.67	1998-09-01	25.1857	24.8294
1998.75	1998-10-01	24.5521	24.9746
1998.83	1998-11-01	25.1612	24.3515
1998.92	1998-12-01	22.6901	23.2233
1999	1999-01-01	23.0949	23.384
1999.08	1999-02-01	22.0295	23.422
1999.17	1999-03-01	22.1771	22.4096
1999.25	1999-04-01	22.6019	21.3925
1999.33	1999-05-01	23.529	22.3655
1999.42	1999-06-01	24.8937	23.9093
1999.5	1999-07-01	26.2701	24.4991
1999.58	1999-08-01	27.0105	24.2113
1999.67	1999-09-01	26.2409	24.0754
1999.75	1999-10-01	24.6675	23.5537
1999.83	1999-11-01	24.3343	22.9551
1999.92	1999-12-01	24.2466	21.9954
2000	2000-01-01	21.8602	22.5626
2000.08	2000-02-01	21.2414	21.7967
2000.17	2000-03-01	21.8822	21.2685
2000.25	2000-04-01	24.6246	21.0217
2000.33	2000-05-01	24.6452	21.4912
2000.42	2000-06-01	24.8882	22.2811
2000.5	2000-07-01	25.6716	22.6638
2000.58	2000-08-01	26.4844	24.612
2000.67	2000-09-01	25.6646	25.0533
2000.75	2000-10-01	24.7362	25.4865
2000.83	2000-11-01	24.0086	24.6455
2000.92	2000-12-01	23.602	25.2057
2001	2001-01-01	23.9227	23.6311
2001.08	2001-02-01	22.1862	23.7251
2001.17	2001-03-01	23.1978	22.8546
2001.25	2001-04-01	23.3229	24.5146
2001.33	2001-05-01	23.3732	23.9132
2001.42	2001-06-01	24.2407	25.0071
2001.5	2001-07-01	25.0497	25.1025
2001.58	2001-08-01	26.043	25.8103
2001.67	2001-09-01	25.5227	27.1283
2001.75	2001-10-01	25.7068	27.2619
2001.83	2001-11-01	23.39	25.5377
2001.92	2001-12-01	26.4638	24.4618
2002	2002-01-01	23.531	24.4896
2002.08	2002-02-01	18.9694	23.4936
2002.17	2002-03-01	20.0839	22.6143
2002.25	2002-04-01	21.3177	23.3748
2002.33	2002-05-01	21.8924	23.3541
2002.42	2002-06-01	22.3263	25.1847
2002.5	2002-07-01	23.7393	24.1
2002.58	2002-08-01	25.7125	25.4495
2002.67	2002-09-01	25.9604	24.8413
2002.75	2002-10-01	24.4425	25.9662
2002.83	2002-11-01	26.4099	25.2036
2002.92	2002-12-01	26.0317	24.9972
2003	2003-01-01	23.6266	24.2768
2003.08	2003-02-01	21.3082	23.0511
2003.17	2003-03-01	22.0268	23.2404
2003.25	2003-04-01	21.88	24.0919
2003.33	2003-05-01	25.0017	24.5676
2003.42	2003-06-01	26.2341	25.0175
2003.5	2003-07-01	25.9595	25.4262
2003.58	2003-08-01	26.7586	25.7558
2003.67	2003-09-01	26.1452	27.2743
2003.75	2003-10-01	25.641	28.071
2003.83	2003-11-01	25.6657	27.3245
2003.92	2003-12-01	23.8753	27.8512
2004	2004-01-01	23.4161	27.4742
2004.08	2004-02-01	22.567	25.9076
2004.17	2004-03-01	23.7951	24.4465
2004.25	2004-04-01	25.6505	24.3717
2004.33	2004-05-01	26.4674	22.7955
2004.42	2004-06-01	25.1811	23.6253
2004.5	2004-07-01	26.727	26.8185
2004.58	2004-08-01	27.9909	27.5587
2004.67	2004-09-01	28.1675	27.8201
2004.75	2004-10-01	27.6922	27.3591
2004.83	2004-11-01	26.2911	26.9329
2004.92	2004-12-01	23.844	26.4315
2005	2005-01-01	23.9159	25.4971
2005.08	2005-02-01	23.0043	25.4462
2005.17	2005-03-01	23.5424	24.0704
2005.25	2005-04-01	26.7614	23.7195
2005.33	2005-05-01	27.2538	24.1981
2005.42	2005-06-01	26.9924	25.7561
2005.5	2005-07-01	26.7547	26.3466
2005.58	2005-08-01	27.6714	26.0699
2005.67	2005-09-01	24.9554	27.8813
2005.75	2005-10-01	25.6864	27.5377
2005.83	2005-11-01	23.1895	28.4462
2005.92	2005-12-01	23.1535	27.4232
2006	2006-01-01	23.6409	26.8835
2006.08	2006-02-01	22.2503	25.2149
2006.17	2006-03-01	23.6483	24.4414
2006.25	2006-04-01	24.0832	23.6341
2006.33	2006-05-01	22.4535	22.8226
2006.42	2006-06-01	22.1256	22.894
2006.5	2006-07-01	22.3975	25.2623
2006.58	2006-08-01	24.3187	26.3993
2006.67	2006-09-01	24.1489	27.2797
2006.75	2006-10-01	21.4116	27.4383
2006.83	2006-11-01	20.5358	27.2238
2006.92	2006-12-01	20.5489	26.9174
2007	2007-01-01	20.5051	25.4932
2007.08	2007-02-01	20.4495	23.5545
2007.17	2007-03-01	21.2282	22.791
2007.25	2007-04-01	21.333	23.9525
2007.33	2007-05-01	23.1259	24.931
2007.42	2007-06-01	24.3283	25.8099
2007.5	2007-07-01	25.1337	26.005
2007.58	2007-08-01	26.1091	26.0366
2007.67	2007-09-01	25.1221	27.1252
2007.75	2007-10-01	24.7843	26.8276
2007.83	2007-11-01	23.2521	27.4045
2007.92	2007-12-01	20.5244	27.3715
2008	2008-01-01	20.8163	25.2216
2008.08	2008-02-01	19.6224	23.196
2008.17	2008-03-01	21.6007	24.0171
2008.25	2008-04-01	22.73	23.1734
2008.33	2008-05-01	20.5597	23.5924
2008.42	2008-06-01	21.9172	23.9869
2008.5	2008-07-01	27.1371	25.7992
2008.58	2008-08-01	27.6529	26.0661
2008.67	2008-09-01	26.3343	26.744
2008.75	2008-10-01	24.1817	26.4046
2008.83	2008-11-01	21.1999	25.9643
2008.92	2008-12-01	21.9162	25.106
2009	2009-01-01	20.6429	24.5025
2009.08	2009-02-01	19.8614	23.4059
2009.17	2009-03-01	21.2936	22.051
2009.25	2009-04-01	22.8794	22.6889
2009.33	2009-05-01	24.4139	22.7026
2009.42	2009-06-01	24.9308	24.0435
2009.5	2009-07-01	25.0402	26.0029
2009.58	2009-08-01	25.1532	26.2447
2009.67	2009-09-01	24.7646	27.0607
2009.75	2009-10-01	24.5288	27.5769
2009.83	2009-11-01	22.0442	26.2081
2009.92	2009-12-01	22.9914	25.707
2010	2010-01-01	22.2224	23.8931
2010.08	2010-02-01	21.8075	23.293
2010.17	2010-03-01	22.33	23.1949
2010.25	2010-04-01	23.0646	23.2262
2010.33	2010-05-01	24.0837	23.7371
2010.42	2010-06-01	24.8995	23.6267
2010.5	2010-07-01	25.5587	24.6067
2010.58	2010-08-01	25.9203	25.4321
2010.67	2010-09-01	25.8622	24.8615
2010.75	2010-10-01	23.8545	26.734
2010.83	2010-11-01	24.0981	25.0928
2010.92	2010-12-01	24.6269	24.9563
2011	2011-01-01	24.4387	25.1878
2011.08	2011-02-01	21.4034	24.1462
2011.17	2011-03-01	21.4635	23.0156
2011.25	2011-04-01	22.0914	22.4828
2011.33	2011-05-01	23.3583	24.1717
2011.42	2011-06-01	24.4596	25.1633
2011.5	2011-07-01	25.38	26.3922
2011.58	2011-08-01	26.1993	26.0454
2011.67	2011-09-01	25.6283	26.0636
2011.75	2011-10-01	24.7344	27.1608
2011.83	2011-11-01	23.2302	26.0532
2011.92	2011-12-01	22.4768	25.8148
2012	2012-01-01	24.3602	23.3233
2012.08	2012-02-01	20.0308	22.9851
2012.17	2012-03-01	20.8932	21.8482
2012.25	2012-04-01	20.5987	21.8719
2012.33	2012-05-01	22.3679	23.4995
2012.42	2012-06-01	23.1546	24.0875
2012.5	2012-07-01	23.6225	25.2372
2012.58	2012-08-01	23.4357	25.9367
2012.67	2012-09-01	22.5358	26.0925
2012.75	2012-10-01	20.7605	25.3424
2012.83	2012-11-01	21.0897	25.5409
2012.92	2012-12-01	21.0495	25.2634
2013	2013-01-01	20.2569	23.2879
2013.08	2013-02-01	18.3823	21.3884
2013.17	2013-03-01	19.2613	21.5187
2013.25	2013-04-01	20.5431	21.6509
2013.33	2013-05-01	20.2161	22.5564
2013.42	2013-06-01	21.3093	23.532
2013.5	2013-07-01	25.1923	23.6527
2013.58	2013-08-01	26.3221	24.2929
2013.67	2013-09-01	26.7678	25.1001
2013.75	2013-10-01	26.1081	25.439
2013.83	2013-11-01	24.439	25.4443
2013.92	2013-12-01	22.7908	24.5328
2014	2014-01-01	22.0232	22.382
2014.08	2014-02-01	21.8019	21.4331
2014.17	2014-03-01	22.8791	20.2073
2014.25	2014-04-01	23.7924	21.3692
2014.33	2014-05-01	23.1089	21.5801
2014.42	2014-06-01	25.2456	22.3552
2014.5	2014-07-01	26.4572	23.2131
2014.58	2014-08-01	26.1725	24.0847
2014.67	2014-09-01	26.6775	25.0069
2014.75	2014-10-01	24.8409	25.43
2014.83	2014-11-01	23.6617	23.9459
2014.92	2014-12-01	23.713	24.6253
2015	2015-01-01	23.8102	22.3179
2015.08	2015-02-01	22.7725	21.1988
2015.17	2015-03-01	24.6122	20.3638
2015.25	2015-04-01	25.5715	21.353
2015.33	2015-05-01	27.0705	24.1558
2015.42	2015-06-01	27.0584	25.1651
2015.5	2015-07-01	27.9671	26.7245
2015.58	2015-08-01	28.8915	26.7965
2015.67	2015-09-01	28.4672	26.1269
2015.75	2015-10-01	26.2195	26.8584
2015.83	2015-11-01	25.8031	23.8103
2015.92	2015-12-01	24.213	24.7609
2016	2016-01-01	24.8673	24.1123
2016.08	2016-02-01	22.9509	20.4226
2016.17	2016-03-01	24.3501	21.1417
2016.25	2016-04-01	24.4961	21.1398
2016.33	2016-05-01	26.8779	20.8453
2016.42	2016-06-01	27.2486	20.8318
2016.5	2016-07-01	27.4545	22.831
2016.58	2016-08-01	26.8762	22.0346
2016.67	2016-09-01	27.1143	26.2591
2016.75	2016-10-01	26.1213	26.4824
2016.83	2016-11-01	25.7139	24.2787
2016.92	2016-12-01	24.9687	24.9363
2017	2017-01-01	23.802	23.877
2017.08	2017-02-01	23.1061	22.4111
2017.17	2017-03-01	23.8949	21.4347
2017.25	2017-04-01	25.1788	24.3559
2017.33	2017-05-01	26.5792	24.6075
2017.42	2017-06-01	26.9258	26.2734
2017.5	2017-07-01	26.9715	26.6507
2017.58	2017-08-01	27.1103	27.1978
2017.67	2017-09-01	27.1181	27.6966
2017.75	2017-10-01	27.0746	27.4301
2017.83	2017-11-01	25.3422	24.2872
2017.92	2017-12-01	24.9617	23.5675
2018	2018-01-01	23.8937	23.531
2018.08	2018-02-01	23.7374	22.944
2018.17	2018-03-01	23.2716	22.4268
2018.25	2018-04-01	23.4832	22.6224
2018.33	2018-05-01	23.8664	24.0919
2018.42	2018-06-01	26.0572	24.9384
2018.5	2018-07-01	27.0678	24.7705
2018.58	2018-08-01	27.224	25.1489
2018.67	2018-09-01	27.6229	27.1801
2018.75	2018-10-01	27.3648	27.47
2018.83	2018-11-01	26.4409	27.2463
2018.92	2018-12-01	25.2959	25.5984
2019	2019-01-01	25.2544	23.4772
2019.08	2019-02-01	23.9213	23.1489
2019.17	2019-03-01	24.3905	21.4887
2019.25	2019-04-01		24.1068
2019.33	2019-05-01		26.5453
2019.42	2019-06-01		28.5444
2019.5	2019-07-01		28.9431
2019.58	2019-08-01		29.6224
2019.67	2019-09-01		28.9129

## Sheet: scenario B
year	date	Makai Pier SST	Ko'Olina SST
1908.58	1908-08-01	22.9251
1908.67	1908-09-01	24.264
1908.75	1908-10-01	23.0568
1908.83	1908-11-01	22.8022
1908.92	1908-12-01	21.8604
1909	1909-01-01	21.3216
1909.08	1909-02-01	19.7231
1909.17	1909-03-01	20.1668
1909.25	1909-04-01	21.9949
1909.33	1909-05-01	24.1688
1909.42	1909-06-01	23.0665
1909.5	1909-07-01	22.1281
1909.58	1909-08-01	24.034
1909.67	1909-09-01	23.631
1909.75	1909-10-01	22.6429
1909.83	1909-11-01	21.2449
1909.92	1909-12-01	19.5441
1910	1910-01-01	18.0908
1910.08	1910-02-01	17.2801
1910.17	1910-03-01	18.6368
1910.25	1910-04-01	19.6681
1910.33	1910-05-01	20.4463
1910.42	1910-06-01	21.1936
1910.5	1910-07-01	21.2023
1910.58	1910-08-01	#N/A
1910.67	1910-09-01	#N/A
1910.75	1910-10-01	20.3234
1910.83	1910-11-01	21.0994
1910.92	1910-12-01	21.1419
1911	1911-01-01	20.0009
1911.08	1911-02-01	17.3364
1911.17	1911-03-01	17.459
1911.25	1911-04-01	18.5861
1911.33	1911-05-01	20.4829
1911.42	1911-06-01	21.5752
1911.5	1911-07-01	22.6323
1911.58	1911-08-01	24.2403
1911.67	1911-09-01	24.8686
1911.75	1911-10-01	23.4076
1911.83	1911-11-01	23.5778
1911.92	1911-12-01	22.8584
1912	1912-01-01	22.1268
1912.08	1912-02-01	19.3741
1912.17	1912-03-01	20.3513
1912.25	1912-04-01	21.5748
1912.33	1912-05-01	22.32
1912.42	1912-06-01	22.8148
1912.5	1912-07-01	21.8113
1912.58	1912-08-01	23.2372
1912.67	1912-09-01	23.5366
1912.75	1912-10-01	22.8739
1912.83	1912-11-01	22.6734
1912.92	1912-12-01	22.2681
1913	1913-01-01	21.5236
1913.08	1913-02-01	20.3903
1913.17	1913-03-01	21.1201
1913.25	1913-04-01	22.0132
1913.33	1913-05-01	22.9547
1913.42	1913-06-01	23.8895
1913.5	1913-07-01	24.7356
1913.58	1913-08-01	25.3868
1913.67	1913-09-01	24.8789
1913.75	1913-10-01	23.9599
1913.83	1913-11-01	24.2268
1913.92	1913-12-01	23.3224
1914	1914-01-01	20.4367
1914.08	1914-02-01	19.8087
1914.17	1914-03-01	20.7355
1914.25	1914-04-01	20.4366
1914.33	1914-05-01	20.9752
1914.42	1914-06-01	20.9085
1914.5	1914-07-01	22.2913
1914.58	1914-08-01	23.6126
1914.67	1914-09-01	23.1306
1914.75	1914-10-01	22.9732
1914.83	1914-11-01	22.8162
1914.92	1914-12-01	21.064
1915	1915-01-01	20.9544
1915.08	1915-02-01	19.3867
1915.17	1915-03-01	20.8934
1915.25	1915-04-01	22.6966
1915.33	1915-05-01	23.4865
1915.42	1915-06-01	23.537
1915.5	1915-07-01	23.3986
1915.58	1915-08-01	23.7107
1915.67	1915-09-01	22.7956
1915.75	1915-10-01	22.7599
1915.83	1915-11-01	21.9275
1915.92	1915-12-01	20.783
1916	1916-01-01	20.1862
1916.08	1916-02-01	19.555
1916.17	1916-03-01	20.1448
1916.25	1916-04-01	20.6599
1916.33	1916-05-01	21.5794
1916.42	1916-06-01	22.9026
1916.5	1916-07-01	23.4799
1916.58	1916-08-01	23.7583
1916.67	1916-09-01	22.5639
1916.75	1916-10-01	20.3847
1916.83	1916-11-01	19.9305
1916.92	1916-12-01	19.5489
1917	1917-01-01	18.9711
1917.08	1917-02-01	18.2607
1917.17	1917-03-01	19.0261
1917.25	1917-04-01	19.6455
1917.33	1917-05-01	20.237
1917.42	1917-06-01	20.7511
1917.5	1917-07-01	20.483
1917.58	1917-08-01	#N/A
1917.67	1917-09-01	#N/A
1917.75	1917-10-01	#N/A
1917.83	1917-11-01	#N/A
1917.92	1917-12-01	#N/A
1918	1918-01-01	#N/A
1918.08	1918-02-01	#N/A
1918.17	1918-03-01	#N/A
1918.25	1918-04-01	#N/A
1918.33	1918-05-01	#N/A
1918.42	1918-06-01	#N/A
1918.5	1918-07-01	#N/A
1918.58	1918-08-01	#N/A
1918.67	1918-09-01	#N/A
1918.75	1918-10-01	#N/A
1918.83	1918-11-01	#N/A
1918.92	1918-12-01	#N/A
1919	1919-01-01	#N/A
1919.08	1919-02-01	#N/A
1919.17	1919-03-01	#N/A
1919.25	1919-04-01	#N/A
1919.33	1919-05-01	#N/A
1919.42	1919-06-01	#N/A
1919.5	1919-07-01	#N/A
1919.58	1919-08-01	#N/A
1919.67	1919-09-01	#N/A
1919.75	1919-10-01	#N/A
1919.83	1919-11-01	#N/A
1919.92	1919-12-01	#N/A
1920	1920-01-01	#N/A
1920.08	1920-02-01	#N/A
1920.17	1920-03-01	#N/A
1920.25	1920-04-01	#N/A
1920.33	1920-05-01	#N/A
1920.42	1920-06-01	#N/A
1920.5	1920-07-01	#N/A
1920.58	1920-08-01	#N/A
1920.67	1920-09-01	#N/A
1920.75	1920-10-01	#N/A
1920.83	1920-11-01	#N/A
1920.92	1920-12-01	#N/A
1921	1921-01-01	#N/A
1921.08	1921-02-01	#N/A
1921.17	1921-03-01	#N/A
1921.25	1921-04-01	#N/A
1921.33	1921-05-01	#N/A
1921.42	1921-06-01	#N/A
1921.5	1921-07-01	#N/A
1921.58	1921-08-01	#N/A
1921.67	1921-09-01	#N/A
1921.75	1921-10-01	#N/A
1921.83	1921-11-01	#N/A
1921.92	1921-12-01	#N/A
1922	1922-01-01	#N/A
1922.08	1922-02-01	#N/A
1922.17	1922-03-01	19.035
1922.25	1922-04-01	19.8496
1922.33	1922-05-01	19.6491
1922.42	1922-06-01	21.2211
1922.5	1922-07-01	21.2519
1922.58	1922-08-01	21.4491
1922.67	1922-09-01	21.3816
1922.75	1922-10-01	21.5971
1922.83	1922-11-01	21.6259
1922.92	1922-12-01	20.7946
1923	1923-01-01	20.224
1923.08	1923-02-01	18.2243
1923.17	1923-03-01	19.266
1923.25	1923-04-01	20.2548
1923.33	1923-05-01	21.1397
1923.42	1923-06-01	23.3875
1923.5	1923-07-01	23.5506
1923.58	1923-08-01	23.5538
1923.67	1923-09-01	23.681
1923.75	1923-10-01	23.4677
1923.83	1923-11-01	21.0044
1923.92	1923-12-01	20.8711
1924	1924-01-01	20.3569
1924.08	1924-02-01	20.0618
1924.17	1924-03-01	21.272
1924.25	1924-04-01	22.5657
1924.33	1924-05-01	23.0863
1924.42	1924-06-01	23.4731
1924.5	1924-07-01	23.621
1924.58	1924-08-01	23.6735
1924.67	1924-09-01	23.6868
1924.75	1924-10-01	23.6029
1924.83	1924-11-01	23.1774
1924.92	1924-12-01	22.3979
1925	1925-01-01	21.1668
1925.08	1925-02-01	19.4447
1925.17	1925-03-01	19.604
1925.25	1925-04-01	19.6988
1925.33	1925-05-01	19.6469
1925.42	1925-06-01	19.8925
1925.5	1925-07-01	#N/A
1925.58	1925-08-01	#N/A
1925.67	1925-09-01	#N/A
1925.75	1925-10-01	#N/A
1925.83	1925-11-01	#N/A
1925.92	1925-12-01	#N/A
1926	1926-01-01	#N/A
1926.08	1926-02-01	#N/A
1926.17	1926-03-01	19.4023
1926.25	1926-04-01	21.0088
1926.33	1926-05-01	22.7885
1926.42	1926-06-01	23.0682
1926.5	1926-07-01	24.2995
1926.58	1926-08-01	24.7008
1926.67	1926-09-01	25.2403
1926.75	1926-10-01	25.1408
1926.83	1926-11-01	24.1553
1926.92	1926-12-01	23.8918
1927	1927-01-01	22.2046
1927.08	1927-02-01	21.0691
1927.17	1927-03-01	23.5692
1927.25	1927-04-01	23.3877
1927.33	1927-05-01	23.0302
1927.42	1927-06-01	23.7968
1927.5	1927-07-01	23.528
1927.58	1927-08-01	23.9628
1927.67	1927-09-01	23.8031
1927.75	1927-10-01	23.5462
1927.83	1927-11-01	23.8999
1927.92	1927-12-01	23.8066
1928	1928-01-01	22.0625
1928.08	1928-02-01	21.2783
1928.17	1928-03-01	21.5853
1928.25	1928-04-01	21.7784
1928.33	1928-05-01	22.158
1928.42	1928-06-01	24.2124
1928.5	1928-07-01	24.2336
1928.58	1928-08-01	25.4711
1928.67	1928-09-01	24.7121
1928.75	1928-10-01	22.7873
1928.83	1928-11-01	22.3834
1928.92	1928-12-01	22.393
1929	1929-01-01	22.0887
1929.08	1929-02-01	20.9059
1929.17	1929-03-01	22.6201
1929.25	1929-04-01	23.9852
1929.33	1929-05-01	24.0561
1929.42	1929-06-01	25.5944
1929.5	1929-07-01	25.4331
1929.58	1929-08-01	26.3142
1929.67	1929-09-01	25.2152
1929.75	1929-10-01	25.6696
1929.83	1929-11-01	24.0501
1929.92	1929-12-01	23.4535
1930	1930-01-01	21.7208
1930.08	1930-02-01	19.3582
1930.17	1930-03-01	19.6153
1930.25	1930-04-01	20.4402
1930.33	1930-05-01	21.5586
1930.42	1930-06-01	22.6608
1930.5	1930-07-01	24.0716
1930.58	1930-08-01	24.8784
1930.67	1930-09-01	23.7348
1930.75	1930-10-01	23.9118
1930.83	1930-11-01	24
1930.92	1930-12-01	22.9333
1931	1931-01-01	21.0545
1931.08	1931-02-01	18.0371
1931.17	1931-03-01	20.0603
1931.25	1931-04-01	21.4461
1931.33	1931-05-01	22.4443
1931.42	1931-06-01	22.9343
1931.5	1931-07-01	22.8951
1931.58	1931-08-01	22.8957
1931.67	1931-09-01	22.8101
1931.75	1931-10-01	21.7716
1931.83	1931-11-01	20.8024
1931.92	1931-12-01	19.7687
1932	1932-01-01	18.5176
1932.08	1932-02-01	17.8992
1932.17	1932-03-01	19.7441
1932.25	1932-04-01	20.7604
1932.33	1932-05-01	21.7008
1932.42	1932-06-01	23.0596
1932.5	1932-07-01	22.8802
1932.58	1932-08-01	23.0696
1932.67	1932-09-01	22.7313
1932.75	1932-10-01	21.5297
1932.83	1932-11-01	#N/A
1932.92	1932-12-01	#N/A
1933	1933-01-01	#N/A
1933.08	1933-02-01	#N/A
1933.17	1933-03-01	#N/A
1933.25	1933-04-01	#N/A
1933.33	1933-05-01	#N/A
1933.42	1933-06-01	#N/A
1933.5	1933-07-01	#N/A
1933.58	1933-08-01	#N/A
1933.67	1933-09-01	#N/A
1933.75	1933-10-01	#N/A
1933.83	1933-11-01	#N/A
1933.92	1933-12-01	#N/A
1934	1934-01-01	#N/A
1934.08	1934-02-01	#N/A
1934.17	1934-03-01	#N/A
1934.25	1934-04-01	#N/A
1934.33	1934-05-01	#N/A
1934.42	1934-06-01	#N/A
1934.5	1934-07-01	#N/A
1934.58	1934-08-01	#N/A
1934.67	1934-09-01	#N/A
1934.75	1934-10-01	#N/A
1934.83	1934-11-01	#N/A
1934.92	1934-12-01	#N/A
1935	1935-01-01	#N/A
1935.08	1935-02-01	#N/A
1935.17	1935-03-01	#N/A
1935.25	1935-04-01	#N/A
1935.33	1935-05-01	#N/A
1935.42	1935-06-01	#N/A
1935.5	1935-07-01	#N/A
1935.58	1935-08-01	#N/A
1935.67	1935-09-01	#N/A
1935.75	1935-10-01	#N/A
1935.83	1935-11-01	#N/A
1935.92	1935-12-01	#N/A
1936	1936-01-01	#N/A
1936.08	1936-02-01	#N/A
1936.17	1936-03-01	#N/A
1936.25	1936-04-01	#N/A
1936.33	1936-05-01	#N/A
1936.42	1936-06-01	#N/A
1936.5	1936-07-01	#N/A
1936.58	1936-08-01	#N/A
1936.67	1936-09-01	#N/A
1936.75	1936-10-01	#N/A
1936.83	1936-11-01	#N/A
1936.92	1936-12-01	#N/A
1937	1937-01-01	#N/A
1937.08	1937-02-01	#N/A
1937.17	1937-03-01	#N/A
1937.25	1937-04-01	#N/A
1937.33	1937-05-01	#N/A
1937.42	1937-06-01	#N/A
1937.5	1937-07-01	#N/A
1937.58	1937-08-01	#N/A
1937.67	1937-09-01	#N/A
1937.75	1937-10-01	24.2758
1937.83	1937-11-01	23.8059
1937.92	1937-12-01	22.7398
1938	1938-01-01	21.2441
1938.08	1938-02-01	20.9585
1938.17	1938-03-01	21.3837
1938.25	1938-04-01	21.7132
1938.33	1938-05-01	21.7834
1938.42	1938-06-01	22.5779
1938.5	1938-07-01	23.53
1938.58	1938-08-01	24.1132
1938.67	1938-09-01	24.1964
1938.75	1938-10-01	23.8938
1938.83	1938-11-01	23.6604
1938.92	1938-12-01	24.0228
1939	1939-01-01	23.3266
1939.08	1939-02-01	20.6424
1939.17	1939-03-01	22.157
1939.25	1939-04-01	21.4373
1939.33	1939-05-01	20.8656
1939.42	1939-06-01	20.8152
1939.5	1939-07-01	22.6111
1939.58	1939-08-01	24.2411
1939.67	1939-09-01	24.6181
1939.75	1939-10-01	24.4073
1939.83	1939-11-01	24.5781
1939.92	1939-12-01	21.8835
1940	1940-01-01	18.3032
1940.08	1940-02-01	#N/A
1940.17	1940-03-01	#N/A
1940.25	1940-04-01	#N/A
1940.33	1940-05-01	#N/A
1940.42	1940-06-01	#N/A
1940.5	1940-07-01	#N/A
1940.58	1940-08-01	#N/A
1940.67	1940-09-01	#N/A
1940.75	1940-10-01	#N/A
1940.83	1940-11-01	#N/A
1940.92	1940-12-01	24.8136
1941	1941-01-01	23.4563
1941.08	1941-02-01	22.8551
1941.17	1941-03-01	22.9356
1941.25	1941-04-01	24.0043
1941.33	1941-05-01	25.0501
1941.42	1941-06-01	25.194
1941.5	1941-07-01	25.0934
1941.58	1941-08-01	25.8469
1941.67	1941-09-01	24.8146
1941.75	1941-10-01	25.6364
1941.83	1941-11-01	24.5209
1941.92	1941-12-01	21.3996
1942	1942-01-01	20.9479
1942.08	1942-02-01	19.8458
1942.17	1942-03-01	22.2163
1942.25	1942-04-01	22.593
1942.33	1942-05-01	23.042
1942.42	1942-06-01	23.718
1942.5	1942-07-01	25.4612
1942.58	1942-08-01	24.5542
1942.67	1942-09-01	23.9651
1942.75	1942-10-01	22.9409
1942.83	1942-11-01	22.8125
1942.92	1942-12-01	23.1432
1943	1943-01-01	23.8355
1943.08	1943-02-01	22.373
1943.17	1943-03-01	22.8109
1943.25	1943-04-01	23.2957
1943.33	1943-05-01	24.0323
1943.42	1943-06-01	24.8626
1943.5	1943-07-01	25.5005
1943.58	1943-08-01	26.074
1943.67	1943-09-01	25.6792
1943.75	1943-10-01	24.7384
1943.83	1943-11-01	23.6607
1943.92	1943-12-01	23.0899
1944	1944-01-01	#N/A
1944.08	1944-02-01	#N/A
1944.17	1944-03-01	#N/A
1944.25	1944-04-01	#N/A
1944.33	1944-05-01	#N/A
1944.42	1944-06-01	#N/A
1944.5	1944-07-01	#N/A
1944.58	1944-08-01	#N/A
1944.67	1944-09-01	#N/A
1944.75	1944-10-01	#N/A
1944.83	1944-11-01	#N/A
1944.92	1944-12-01	#N/A
1945	1945-01-01	#N/A
1945.08	1945-02-01	#N/A
1945.17	1945-03-01	#N/A
1945.25	1945-04-01	#N/A
1945.33	1945-05-01	#N/A
1945.42	1945-06-01	#N/A
1945.5	1945-07-01	#N/A
1945.58	1945-08-01	#N/A
1945.67	1945-09-01	#N/A
1945.75	1945-10-01	#N/A
1945.83	1945-11-01	#N/A
1945.92	1945-12-01	#N/A
1946	1946-01-01	#N/A
1946.08	1946-02-01	#N/A
1946.17	1946-03-01	#N/A
1946.25	1946-04-01	#N/A
1946.33	1946-05-01	#N/A
1946.42	1946-06-01	#N/A
1946.5	1946-07-01	#N/A
1946.58	1946-08-01	#N/A
1946.67	1946-09-01	#N/A
1946.75	1946-10-01	#N/A
1946.83	1946-11-01	#N/A
1946.92	1946-12-01	#N/A
1947	1947-01-01	#N/A
1947.08	1947-02-01	#N/A
1947.17	1947-03-01	#N/A
1947.25	1947-04-01	#N/A
1947.33	1947-05-01	#N/A
1947.42	1947-06-01	#N/A
1947.5	1947-07-01	#N/A
1947.58	1947-08-01	#N/A
1947.67	1947-09-01	#N/A
1947.75	1947-10-01	#N/A
1947.83	1947-11-01	#N/A
1947.92	1947-12-01	#N/A
1948	1948-01-01	#N/A
1948.08	1948-02-01	#N/A
1948.17	1948-03-01	#N/A
1948.25	1948-04-01	#N/A
1948.33	1948-05-01	#N/A
1948.42	1948-06-01	#N/A
1948.5	1948-07-01	#N/A
1948.58	1948-08-01	#N/A
1948.67	1948-09-01	#N/A
1948.75	1948-10-01	#N/A
1948.83	1948-11-01	#N/A
1948.92	1948-12-01	#N/A
1949	1949-01-01	#N/A
1949.08	1949-02-01	18.8041
1949.17	1949-03-01	20.1979
1949.25	1949-04-01	20.9272
1949.33	1949-05-01	19.3338
1949.42	1949-06-01	21.2823
1949.5	1949-07-01	24.5592
1949.58	1949-08-01	25.5884
1949.67	1949-09-01	25.0154
1949.75	1949-10-01	24.5306
1949.83	1949-11-01	23.4289
1949.92	1949-12-01	22.3991
1950	1950-01-01	21.7931
1950.08	1950-02-01	20.6775
1950.17	1950-03-01	22.3466
1950.25	1950-04-01	23.6792
1950.33	1950-05-01	23.4881
1950.42	1950-06-01	24.2386
1950.5	1950-07-01	23.0676
1950.58	1950-08-01	25.6029
1950.67	1950-09-01	25.0714
1950.75	1950-10-01	25.0654
1950.83	1950-11-01	24.5955
1950.92	1950-12-01	22.7306
1951	1951-01-01	21.1166
1951.08	1951-02-01	20.6778
1951.17	1951-03-01	20.7724
1951.25	1951-04-01	21.0594
1951.33	1951-05-01	22.2893
1951.42	1951-06-01	23.5683
1951.5	1951-07-01	24.3805
1951.58	1951-08-01	25.2264
1951.67	1951-09-01	24.8583
1951.75	1951-10-01	23.6924
1951.83	1951-11-01	22.8146
1951.92	1951-12-01	22.7254
1952	1952-01-01	20.3489
1952.08	1952-02-01	16.4036
1952.17	1952-03-01	19.628
1952.25	1952-04-01	19.6391
1952.33	1952-05-01	22.0619
1952.42	1952-06-01	21.9223
1952.5	1952-07-01	21.7285
1952.58	1952-08-01	23.0987
1952.67	1952-09-01	22.6319
1952.75	1952-10-01	21.4613
1952.83	1952-11-01	20.6544
1952.92	1952-12-01	19.967
1953	1953-01-01	20.0198
1953.08	1953-02-01	19.027
1953.17	1953-03-01	19.0962
1953.25	1953-04-01	19.6454
1953.33	1953-05-01	20.8831
1953.42	1953-06-01	21.5342
1953.5	1953-07-01	22.8494
1953.58	1953-08-01	24.5028
1953.67	1953-09-01	24.929
1953.75	1953-10-01	24.6174
1953.83	1953-11-01	23.7485
1953.92	1953-12-01	21.6631
1954	1954-01-01	20.7347
1954.08	1954-02-01	19.9986
1954.17	1954-03-01	21.7958
1954.25	1954-04-01	21.675
1954.33	1954-05-01	21.4005
1954.42	1954-06-01	22.5378
1954.5	1954-07-01	24.517
1954.58	1954-08-01	24.839
1954.67	1954-09-01	24.185
1954.75	1954-10-01	23.4141
1954.83	1954-11-01	21.9379
1954.92	1954-12-01	22.08
1955	1955-01-01	19.4031
1955.08	1955-02-01	17.9784
1955.17	1955-03-01	19.106
1955.25	1955-04-01	21.2672
1955.33	1955-05-01	22.7255
1955.42	1955-06-01	24.4299
1955.5	1955-07-01	25.3159
1955.58	1955-08-01	25.4667
1955.67	1955-09-01	25.4312
1955.75	1955-10-01	24.6104
1955.83	1955-11-01	24.0492
1955.92	1955-12-01	23.1619
1956	1956-01-01	22.0065
1956.08	1956-02-01	21.0316
1956.17	1956-03-01	21.5985
1956.25	1956-04-01	23.0768
1956.33	1956-05-01	22.2805
1956.42	1956-06-01	24.9225
1956.5	1956-07-01	26.0359
1956.58	1956-08-01	26.4443
1956.67	1956-09-01	25.366
1956.75	1956-10-01	25.0607
1956.83	1956-11-01	24.8766
1956.92	1956-12-01	22.021
1957	1957-01-01	20.3824
1957.08	1957-02-01	19.2102	#N/A
1957.17	1957-03-01	21.0928	#N/A
1957.25	1957-04-01	22.1534	23.2475
1957.33	1957-05-01	24.1639	21.8801
1957.42	1957-06-01	24.8736	22.4029
1957.5	1957-07-01	25.4657	22.4986
1957.58	1957-08-01	26.1429	23.4639
1957.67	1957-09-01	25.7886	24.1493
1957.75	1957-10-01	24.8406	25.3823
1957.83	1957-11-01	24.5384	24.2902
1957.92	1957-12-01	23.3306	24.4583
1958	1958-01-01	21.4978	22.9479
1958.08	1958-02-01	21.1563	22.2641
1958.17	1958-03-01	21.2527	21.5354
1958.25	1958-04-01	21.44	22.0695
1958.33	1958-05-01	21.5532	23.3516
1958.42	1958-06-01	21.5495	22.9147
1958.5	1958-07-01	22.2407	23.2592
1958.58	1958-08-01	24.7335	24.3081
1958.67	1958-09-01	25.6282	23.9254
1958.75	1958-10-01	25.5386	24.196
1958.83	1958-11-01	24.9627	23.9669
1958.92	1958-12-01	23.8271	24.9124
1959	1959-01-01	22.4345	23.693
1959.08	1959-02-01	22.411	23.0143
1959.17	1959-03-01	23.4396	20.5145
1959.25	1959-04-01	23.1099	20.4709
1959.33	1959-05-01	23.5626	20.792
1959.42	1959-06-01	23.7838	23.1482
1959.5	1959-07-01	24.7194	23.8377
1959.58	1959-08-01	24.8537	24.1205
1959.67	1959-09-01	24.9248	24.495
1959.75	1959-10-01	24.8262	24.7541
1959.83	1959-11-01	24.2164	22.3193
1959.92	1959-12-01	22.7997	22.4806
1960	1960-01-01	22.0046	21.6934
1960.08	1960-02-01	21.9555	20.0228
1960.17	1960-03-01	22.0814	19.1869
1960.25	1960-04-01	22.2755	19.8728
1960.33	1960-05-01	22.918	20.9256
1960.42	1960-06-01	24.0969	23.2495
1960.5	1960-07-01	24.3958	23.8012
1960.58	1960-08-01	25.2896	24.6694
1960.67	1960-09-01	25.2258	25.5479
1960.75	1960-10-01	25.2486	25.4824
1960.83	1960-11-01	23.4377	24.7376
1960.92	1960-12-01	24.2365	23.1969
1961	1961-01-01	22.4583	22.5164
1961.08	1961-02-01	21.9462	21.4353
1961.17	1961-03-01	22.0225	20.1632
1961.25	1961-04-01	22.0686	20.9153
1961.33	1961-05-01	22.5413	23.0344
1961.42	1961-06-01	25.5107	23.2688
1961.5	1961-07-01	25.7835	24.0068
1961.58	1961-08-01	25.8229	23.3135
1961.67	1961-09-01	25.6363	24.4224
1961.75	1961-10-01	25.2729	25.4932
1961.83	1961-11-01	24.7801	24.9683
1961.92	1961-12-01	23.7629	24.6895
1962	1962-01-01	24.1036	22.9345
1962.08	1962-02-01	21.3881	20.343
1962.17	1962-03-01	22.6319	19.1636
1962.25	1962-04-01	23.4047	19.0812
1962.33	1962-05-01	24.5486	19.6836
1962.42	1962-06-01	25.3772	20.1359
1962.5	1962-07-01	25.6231	21.9991
1962.58	1962-08-01	25.8283	24.4424
1962.67	1962-09-01	25.4332	24.1736
1962.75	1962-10-01	25.1671	25.1564
1962.83	1962-11-01	23.8172	24.93
1962.92	1962-12-01	22.016	22.1326
1963	1963-01-01	22.2276	21.3218
1963.08	1963-02-01	20.5581	21.6111
1963.17	1963-03-01	23.2149	21.3945
1963.25	1963-04-01	24.4967	22.777
1963.33	1963-05-01	24.869	24.9533
1963.42	1963-06-01	25.4328	24.113
1963.5	1963-07-01	25.4758	25.0612
1963.58	1963-08-01	26.5068	25.9691
1963.67	1963-09-01	26.2143	26.5955
1963.75	1963-10-01	25.6493	26.6045
1963.83	1963-11-01	24.0812	25.4239
1963.92	1963-12-01	20.7222	25.98
1964	1964-01-01	20.3233	26.0377
1964.08	1964-02-01	20.1919	23.4199
1964.17	1964-03-01	21.3984	22.2777
1964.25	1964-04-01	20.8269	22.979
1964.33	1964-05-01	23.7283	22.2807
1964.42	1964-06-01	25.1221	22.303
1964.5	1964-07-01	25.1969	22.8871
1964.58	1964-08-01	25.4502	23.4612
1964.67	1964-09-01	24.856	24.8579
1964.75	1964-10-01	23.4472	24.8323
1964.83	1964-11-01	22.436	25.6035
1964.92	1964-12-01	20.1448	25.499
1965	1965-01-01	20.2376	23.6213
1965.08	1965-02-01	19.4867	23.8128
1965.17	1965-03-01	20.5054	20.8376
1965.25	1965-04-01	22.3751	21.8219
1965.33	1965-05-01	23.9824	22.5183
1965.42	1965-06-01	25.205	24.5727
1965.5	1965-07-01	24.8876	25.6127
1965.58	1965-08-01	25.8037	25.5678
1965.67	1965-09-01	25.982	26.5537
1965.75	1965-10-01	25.1482	26.7548
1965.83	1965-11-01	24.4201	26.3256
1965.92	1965-12-01	23.8568	22.7094
1966	1966-01-01	#N/A	21.7281
1966.08	1966-02-01	#N/A	23.2403
1966.17	1966-03-01	#N/A	20.3178
1966.25	1966-04-01	#N/A	21.4603
1966.33	1966-05-01	#N/A	21.2391
1966.42	1966-06-01	#N/A	21.8343
1966.5	1966-07-01	#N/A	22.9605
1966.58	1966-08-01	#N/A	24.1645
1966.67	1966-09-01	#N/A	23.6612
1966.75	1966-10-01	#N/A	25.5127
1966.83	1966-11-01	#N/A	26.1948
1966.92	1966-12-01	#N/A	24.2977
1967	1967-01-01	#N/A	21.474
1967.08	1967-02-01	#N/A	23.2782
1967.17	1967-03-01	#N/A	21.0621
1967.25	1967-04-01	#N/A	21.5805
1967.33	1967-05-01	#N/A	21.3609
1967.42	1967-06-01	#N/A	22.8499
1967.5	1967-07-01	#N/A	24.6755
1967.58	1967-08-01	#N/A	24.6502
1967.67	1967-09-01	#N/A	25.8971
1967.75	1967-10-01	#N/A	25.3004
1967.83	1967-11-01	#N/A	22.6329
1967.92	1967-12-01	#N/A	23.5849
1968	1968-01-01	#N/A	23.4845
1968.08	1968-02-01	#N/A	22.2774
1968.17	1968-03-01	#N/A	20.4497
1968.25	1968-04-01	#N/A	21.574
1968.33	1968-05-01	#N/A	22.2495
1968.42	1968-06-01	#N/A	24.9756
1968.5	1968-07-01	#N/A	24.1812
1968.58	1968-08-01	#N/A	24.9105
1968.67	1968-09-01	#N/A	24.4646
1968.75	1968-10-01	#N/A	25.4679
1968.83	1968-11-01	#N/A	24.9709
1968.92	1968-12-01	#N/A	23.1817
1969	1969-01-01	#N/A	21.6147
1969.08	1969-02-01	#N/A	21.7552
1969.17	1969-03-01	24.296	19.9578
1969.25	1969-04-01	24.0801	21.7281
1969.33	1969-05-01	24.2711	22.2738
1969.42	1969-06-01	24.4393	23.4132
1969.5	1969-07-01	24.1477	23.0659
1969.58	1969-08-01	25.1464	25.2183
1969.67	1969-09-01	24.4598	25.1458
1969.75	1969-10-01	24.8915	25.8548
1969.83	1969-11-01	22.2614	25.2815
1969.92	1969-12-01	22.506	24.2433
1970	1970-01-01	22.7902	18.0472
1970.08	1970-02-01	19.4502	20.7004
1970.17	1970-03-01	19.7483	18.4866
1970.25	1970-04-01	20.221	19.1532
1970.33	1970-05-01	20.4765	20.8016
1970.42	1970-06-01	22.5213	21.4435
1970.5	1970-07-01	24.0042	21.1571
1970.58	1970-08-01	25.0434	21.9226
1970.67	1970-09-01	23.6486	24.038
1970.75	1970-10-01	24.0479	23.7476
1970.83	1970-11-01	23.3065	19.9908
1970.92	1970-12-01	21.6349	21.271
1971	1971-01-01	22.4696	19.4558
1971.08	1971-02-01	21.1664	20.1366
1971.17	1971-03-01	21.402	19.1166
1971.25	1971-04-01	22.1061	20.4234
1971.33	1971-05-01	21.6857	22.7249
1971.42	1971-06-01	22.261	23.8161
1971.5	1971-07-01	22.7265	24.0873
1971.58	1971-08-01	24.8366	25.2628
1971.67	1971-09-01	24.7868	25.9403
1971.75	1971-10-01	23.8103	26.1084
1971.83	1971-11-01	22.6145	24.3367
1971.92	1971-12-01	23.0666	25.1252
1972	1972-01-01	22.0476	23.9577
1972.08	1972-02-01	20.3438	22.7742
1972.17	1972-03-01	20.7618	20.5261
1972.25	1972-04-01	21.0561	20.6059
1972.33	1972-05-01	22.3333	23.0399
1972.42	1972-06-01	24.1135	22.9678
1972.5	1972-07-01	24.2731	23.2913
1972.58	1972-08-01	24.5452	24.0985
1972.67	1972-09-01	24.8426	24.416
1972.75	1972-10-01	24.527	24.5228
1972.83	1972-11-01	23.6424	22.8234
1972.92	1972-12-01	22.5707	21.9554
1973	1973-01-01	20.7543	19.2489
1973.08	1973-02-01	20.1963	18.9158
1973.17	1973-03-01	20.9756	18.468
1973.25	1973-04-01	21.0046	19.3687
1973.33	1973-05-01	22.5574	20.2416
1973.42	1973-06-01	24.2107	20.1261
1973.5	1973-07-01	24.0565	21.9885
1973.58	1973-08-01	25.0251	23.047
1973.67	1973-09-01	25.3812	24.7567
1973.75	1973-10-01	24.7967	25.3809
1973.83	1973-11-01	23.9728	23.7405
1973.92	1973-12-01	23.628	22.0968
1974	1974-01-01	23.1813	20.0819
1974.08	1974-02-01	22.4191	19.8273
1974.17	1974-03-01	23.3525	19.4185
1974.25	1974-04-01	23.4403	19.8074
1974.33	1974-05-01	24.4205	20.205
1974.42	1974-06-01	24.8186	22.1226
1974.5	1974-07-01	24.393	24.071
1974.58	1974-08-01	25.2613	25.6246
1974.67	1974-09-01	23.9629	24.8132
1974.75	1974-10-01	24.86	26.1562
1974.83	1974-11-01	23.5542	24.937
1974.92	1974-12-01	22.4755	24.5976
1975	1975-01-01	21.7057	22.528
1975.08	1975-02-01	21.2686	20.8779
1975.17	1975-03-01	22.0171	20.3059
1975.25	1975-04-01	23.0065	21.8421
1975.33	1975-05-01	23.6841	22.1817
1975.42	1975-06-01	23.7453	22.9041
1975.5	1975-07-01	23.922	25.0232
1975.58	1975-08-01	24.1481	24.4692
1975.67	1975-09-01	24.0906	24.4423
1975.75	1975-10-01	23.2623	#N/A
1975.83	1975-11-01	22.8133	#N/A
1975.92	1975-12-01	21.6702	#N/A
1976	1976-01-01	19.8415	#N/A
1976.08	1976-02-01	19.4148	#N/A
1976.17	1976-03-01	21.0704	#N/A
1976.25	1976-04-01	21.7868	#N/A
1976.33	1976-05-01	24.7378	#N/A
1976.42	1976-06-01	25.5399	#N/A
1976.5	1976-07-01	25.9018	#N/A
1976.58	1976-08-01	28.2025	#N/A
1976.67	1976-09-01	25.9498	#N/A
1976.75	1976-10-01	23.1297	#N/A
1976.83	1976-11-01	23.1974	#N/A
1976.92	1976-12-01	22.9848	#N/A
1977	1977-01-01	22.5311	#N/A
1977.08	1977-02-01	21.7097	#N/A
1977.17	1977-03-01	22.0101	#N/A
1977.25	1977-04-01	22.3152	#N/A
1977.33	1977-05-01	22.5619	#N/A
1977.42	1977-06-01	23.3485	#N/A
1977.5	1977-07-01	24.2764	#N/A
1977.58	1977-08-01	25.1532	#N/A
1977.67	1977-09-01	24.4982	#N/A
1977.75	1977-10-01	23.9063	#N/A
1977.83	1977-11-01	24.6488	#N/A
1977.92	1977-12-01	25.0351	#N/A
1978	1978-01-01	21.4764	#N/A
1978.08	1978-02-01	20.97	#N/A
1978.17	1978-03-01	21.801	#N/A
1978.25	1978-04-01	21.3651	#N/A
1978.33	1978-05-01	22.4123	#N/A
1978.42	1978-06-01	23.6222	#N/A
1978.5	1978-07-01	24.9706	#N/A
1978.58	1978-08-01	25.6373	#N/A
1978.67	1978-09-01	25.4236	#N/A
1978.75	1978-10-01	23.1631	#N/A
1978.83	1978-11-01	23.4242	#N/A
1978.92	1978-12-01	22.1428	#N/A
1979	1979-01-01	20.8577	#N/A
1979.08	1979-02-01	20.341	#N/A
1979.17	1979-03-01	21.1933	#N/A
1979.25	1979-04-01	20.8218	#N/A
1979.33	1979-05-01	21.3859	#N/A
1979.42	1979-06-01	23.9939	#N/A
1979.5	1979-07-01	25.0729	#N/A
1979.58	1979-08-01	26.1887	#N/A
1979.67	1979-09-01	26.306	#N/A
1979.75	1979-10-01	25.794	#N/A
1979.83	1979-11-01	25.1151	27.7462
1979.92	1979-12-01	23.4871	26.6777
1980	1980-01-01	20.9837	25.8529
1980.08	1980-02-01	20.1027	22.9336
1980.17	1980-03-01	21.1856	22.5196
1980.25	1980-04-01	22.4957	22.5781
1980.33	1980-05-01	22.4448	22.3149
1980.42	1980-06-01	24.5177	22.7963
1980.5	1980-07-01	23.7673	25.3228
1980.58	1980-08-01	25.0887	25.9621
1980.67	1980-09-01	25.0013	26.2535
1980.75	1980-10-01	22.2885	26.3884
1980.83	1980-11-01	22.7996	27.0599
1980.92	1980-12-01	21.775	25.968
1981	1981-01-01	21.6901	24.6778
1981.08	1981-02-01	20.6967	21.5224
1981.17	1981-03-01	21.2457	21.1993
1981.25	1981-04-01	22.4346	21.5792
1981.33	1981-05-01	23.0972	22.4929
1981.42	1981-06-01	24.6313	24.0698
1981.5	1981-07-01	24.9603	24.5445
1981.58	1981-08-01	26.3363	26.2649
1981.67	1981-09-01	25.5104	25.2594
1981.75	1981-10-01	24.2838	25.5132
1981.83	1981-11-01	23.1346	24.0449
1981.92	1981-12-01	22.8664	23.1944
1982	1982-01-01	21.5743	22.7803
1982.08	1982-02-01	21.2125	21.5844
1982.17	1982-03-01	21.6029	20.9568
1982.25	1982-04-01	21.6867	20.6109
1982.33	1982-05-01	21.5706	21.854
1982.42	1982-06-01	23.9185	23.7535
1982.5	1982-07-01	23.6231	25.8077
1982.58	1982-08-01	24.8533	26.2202
1982.67	1982-09-01	26.0787	26.2429
1982.75	1982-10-01	24.512	24.4378
1982.83	1982-11-01	23.7714	23.7438
1982.92	1982-12-01	22.3179	20.5765
1983	1983-01-01	22.2553	20.9082
1983.08	1983-02-01	21.6624	21.0112
1983.17	1983-03-01	22.6277	20.6713
1983.25	1983-04-01	23.3554	20.8681
1983.33	1983-05-01	23.4595	21.3257
1983.42	1983-06-01	23.6533	21.5576
1983.5	1983-07-01	23.8591	23.616
1983.58	1983-08-01	23.9981	24.9976
1983.67	1983-09-01	23.7573	25.7687
1983.75	1983-10-01	23.2854	26.7451
1983.83	1983-11-01	23.4925	26.9127
1983.92	1983-12-01	23.3488	21.8665
1984	1984-01-01	23.0265	20.0844
1984.08	1984-02-01	22.0895	21.0401
1984.17	1984-03-01	22.9061	21.2814
1984.25	1984-04-01	22.4396	20.5194
1984.33	1984-05-01	22.9538	24.6001
1984.42	1984-06-01	24.1258	27.5476
1984.5	1984-07-01	25.0153	25.3596
1984.58	1984-08-01	26.3283	27.8187
1984.67	1984-09-01	26.6074	27.2646
1984.75	1984-10-01	25.7564	28.6242
1984.83	1984-11-01	26.3134	25.8122
1984.92	1984-12-01	25.6372	24.5685
1985	1985-01-01	21.3885	24.9249
1985.08	1985-02-01	20.4019	22.9345
1985.17	1985-03-01	22.3645	23.9202
1985.25	1985-04-01	21.0783	22.2242
1985.33	1985-05-01	21.2042	22.8923
1985.42	1985-06-01	21.1017	23.847
1985.5	1985-07-01	22.5452	22.2712
1985.58	1985-08-01	26.318	24.7183
1985.67	1985-09-01	26.1992	26.1633
1985.75	1985-10-01	26.0446	24.5068
1985.83	1985-11-01	25.3213	23.9539
1985.92	1985-12-01	22.0847	24.6759
1986	1986-01-01	20.8626	23.3491
1986.08	1986-02-01	20.5659	23.2221
1986.17	1986-03-01	21.4958	21.3868
1986.25	1986-04-01	21.8986	21.7522
1986.33	1986-05-01	23.8784	22.1664
1986.42	1986-06-01	25.8325	23.4825
1986.5	1986-07-01	26.142	25.2051
1986.58	1986-08-01	26.5445	27.6851
1986.67	1986-09-01	27.6858	27.3299
1986.75	1986-10-01	27.5478	27.4308
1986.83	1986-11-01	26.0492	26.8529
1986.92	1986-12-01	23.9781	25.8766
1987	1987-01-01	24.0949	26.3025
1987.08	1987-02-01	22.5267	24.4897
1987.17	1987-03-01	22.9317	24.0901
1987.25	1987-04-01	23.068	21.2023
1987.33	1987-05-01	23.0991	22.742
1987.42	1987-06-01	24.2932	24.1532
1987.5	1987-07-01	27.125	24.2421
1987.58	1987-08-01	27.9485	24.6915
1987.67	1987-09-01	27.8083	24.864
1987.75	1987-10-01	26.7957	24.8924
1987.83	1987-11-01	26.4482	23.7776
1987.92	1987-12-01	24.7004	24.2633
1988	1988-01-01	23.2497	22.631
1988.08	1988-02-01	22.7893	19.9832
1988.17	1988-03-01	23.2382	22.825
1988.25	1988-04-01	23.1086	21.8219
1988.33	1988-05-01	24.4102	23.2312
1988.42	1988-06-01	26.5152	21.5256
1988.5	1988-07-01	26.6068	23.7914
1988.58	1988-08-01	27.4652	24.4113
1988.67	1988-09-01	27.5175	24.2397
1988.75	1988-10-01	26.8434	25.2136
1988.83	1988-11-01	25.4836	23.9893
1988.92	1988-12-01	24.3941	22.9463
1989	1989-01-01	22.8498	22.5684
1989.08	1989-02-01	21.651	21.3764
1989.17	1989-03-01	21.735	20.476
1989.25	1989-04-01	22.0369	21.2109
1989.33	1989-05-01	23.7836	20.4324
1989.42	1989-06-01	26.1727	19.9685
1989.5	1989-07-01	26.6216	20.4108
1989.58	1989-08-01	26.6612	21.2359
1989.67	1989-09-01	26.2525	23.3271
1989.75	1989-10-01	25.8715	24.6047
1989.83	1989-11-01	24.8507	23.7308
1989.92	1989-12-01	22.1215	23.9566
1990	1990-01-01	22.8619	22.236
1990.08	1990-02-01	21.8606	23.1584
1990.17	1990-03-01	23.2076	21.0835
1990.25	1990-04-01	25.0838	21.487
1990.33	1990-05-01	26.1818	21.1471
1990.42	1990-06-01	25.7611	21.6534
1990.5	1990-07-01	26.1791	22.7378
1990.58	1990-08-01	26.9864	22.8496
1990.67	1990-09-01	27.272	23.2418
1990.75	1990-10-01	26.4683	25.2042
1990.83	1990-11-01	24.1677	26.2232
1990.92	1990-12-01	23.5197	26.9752
1991	1991-01-01	22.5058	25.79
1991.08	1991-02-01	21.7054	26.6075
1991.17	1991-03-01	22.0382	22.5334
1991.25	1991-04-01	23.631	21.7062
1991.33	1991-05-01	27.2971	23.0313
1991.42	1991-06-01	26.1322	23.504
1991.5	1991-07-01	26.8919	25.1408
1991.58	1991-08-01	25.6783	24.9494
1991.67	1991-09-01	27.0358	25.1753
1991.75	1991-10-01	22.8754	25.7209
1991.83	1991-11-01	22.5763	24.6631
1991.92	1991-12-01	21.9833	24.207
1992	1992-01-01	21.3025	21.4908
1992.08	1992-02-01	20.665	20.8568
1992.17	1992-03-01	21.0338	20.4613
1992.25	1992-04-01	23.1935	20.6472
1992.33	1992-05-01	26.7489	21.58
1992.42	1992-06-01	26.8488	21.7548
1992.5	1992-07-01	27.4509	22.3864
1992.58	1992-08-01	28.1318	23.5121
1992.67	1992-09-01	26.3998	24.6201
1992.75	1992-10-01	27.2171	24.9418
1992.83	1992-11-01	24.6886	23.2329
1992.92	1992-12-01	22.6736	23.1479
1993	1993-01-01	21.7444	23.5674
1993.08	1993-02-01	21.5556	20.9522
1993.17	1993-03-01	22.2585	20.0968
1993.25	1993-04-01	23.3774	18.8433
1993.33	1993-05-01	24.6332	20.3357
1993.42	1993-06-01	25.8062	20.8553
1993.5	1993-07-01	25.9494	22.0661
1993.58	1993-08-01	26.418	23.3481
1993.67	1993-09-01	26.578	23.5154
1993.75	1993-10-01	25.9077	24.5792
1993.83	1993-11-01	23.9881	23.3253
1993.92	1993-12-01	21.6242	22.8818
1994	1994-01-01	21.4772	23.155
1994.08	1994-02-01	20.9775	21.4034
1994.17	1994-03-01	22.1999	21.9201
1994.25	1994-04-01	22.67	20.2699
1994.33	1994-05-01	24.2681	20.555
1994.42	1994-06-01	26.3521	22.4669
1994.5	1994-07-01	26.8954	24.5628
1994.58	1994-08-01	26.7774	25.508
1994.67	1994-09-01	26.8989	25.5771
1994.75	1994-10-01	24.2971	26.6888
1994.83	1994-11-01	22.3575	24.0735
1994.92	1994-12-01	19.9847	23.691
1995	1995-01-01	19.5153	24.0386
1995.08	1995-02-01	18.1811	20.9267
1995.17	1995-03-01	21.6494	23.4788
1995.25	1995-04-01	21.2438	21.0214
1995.33	1995-05-01	21.9126	23.6268
1995.42	1995-06-01	21.1773	23.7519
1995.5	1995-07-01	23.1946	23.8548
1995.58	1995-08-01	25.7784	26.2121
1995.67	1995-09-01	25.9499	25.998
1995.75	1995-10-01	25.5729	25.2479
1995.83	1995-11-01	25.9051	26.7088
1995.92	1995-12-01	22.8716	25.0734
1996	1996-01-01	23.8884	25.344
1996.08	1996-02-01	21.5961	24.2042
1996.17	1996-03-01	24.4466	20.7257
1996.25	1996-04-01	22.3887	22.9534
1996.33	1996-05-01	21.8159	24.153
1996.42	1996-06-01	23.1628	24.7661
1996.5	1996-07-01	26.2826	24.9867
1996.58	1996-08-01	26.5882	24.9015
1996.67	1996-09-01	26.184	26.4393
1996.75	1996-10-01	23.0126	26.1709
1996.83	1996-11-01	22.4884	25.6608
1996.92	1996-12-01	22.6496	24.1908
1997	1997-01-01	22.4286	21.1709
1997.08	1997-02-01	22.3434	22.168
1997.17	1997-03-01	22.5192	22.6036
1997.25	1997-04-01	23.7049	21.9344
1997.33	1997-05-01	25.2138	23.6746
1997.42	1997-06-01	26.6187	23.8698
1997.5	1997-07-01	27.1836	24.7246
1997.58	1997-08-01	27.7633	24.9842
1997.67	1997-09-01	26.909	24.7929
1997.75	1997-10-01	26.751	24.0965
1997.83	1997-11-01	26.0996	24.5458
1997.92	1997-12-01	22.2115	24.1204
1998	1998-01-01	23.7432	22.6357
1998.08	1998-02-01	21.3668	22.538
1998.17	1998-03-01	21.6246	22.0392
1998.25	1998-04-01	21.9102	21.56
1998.33	1998-05-01	22.9066	20.4337
1998.42	1998-06-01	24.1223	21.8136
1998.5	1998-07-01	25.0213	24.8155
1998.58	1998-08-01	25.8069	24.9599
1998.67	1998-09-01	25.1718	24.8294
1998.75	1998-10-01	24.5508	24.9746
1998.83	1998-11-01	25.1729	24.3515
1998.92	1998-12-01	22.6888	23.2233
1999	1999-01-01	23.1232	23.384
1999.08	1999-02-01	22.0295	23.422
1999.17	1999-03-01	22.1795	22.4096
1999.25	1999-04-01	22.6246	21.3925
1999.33	1999-05-01	23.546	22.3655
1999.42	1999-06-01	24.9135	23.9093
1999.5	1999-07-01	26.2767	24.4991
1999.58	1999-08-01	27.0126	24.2113
1999.67	1999-09-01	26.2217	24.0754
1999.75	1999-10-01	24.6948	23.5537
1999.83	1999-11-01	24.268	22.9551
1999.92	1999-12-01	24.2948	21.9954
2000	2000-01-01	21.8461	22.5626
2000.08	2000-02-01	21.2414	21.7967
2000.17	2000-03-01	21.9309	21.2685
2000.25	2000-04-01	24.631	21.0217
2000.33	2000-05-01	24.6418	21.4912
2000.42	2000-06-01	24.8968	22.2811
2000.5	2000-07-01	25.6725	22.6638
2000.58	2000-08-01	26.5003	24.612
2000.67	2000-09-01	25.6443	25.0533
2000.75	2000-10-01	24.6742	25.4865
2000.83	2000-11-01	23.9761	24.6455
2000.92	2000-12-01	23.6159	25.2057
2001	2001-01-01	23.9146	23.6311
2001.08	2001-02-01	22.1862	23.7251
2001.17	2001-03-01	23.1978	22.8546
2001.25	2001-04-01	23.3229	24.5146
2001.33	2001-05-01	23.3732	23.9132
2001.42	2001-06-01	24.2407	25.0071
2001.5	2001-07-01	25.0497	25.1025
2001.58	2001-08-01	26.043	25.8103
2001.67	2001-09-01	25.5002	27.1283
2001.75	2001-10-01	25.6373	27.2619
2001.83	2001-11-01	23.4222	25.5377
2001.92	2001-12-01	26.485	24.4618
2002	2002-01-01	23.5133	24.4896
2002.08	2002-02-01	18.9694	23.4936
2002.17	2002-03-01	20.0839	22.6143
2002.25	2002-04-01	21.3177	23.3748
2002.33	2002-05-01	21.8924	23.3541
2002.42	2002-06-01	22.3263	25.1847
2002.5	2002-07-01	23.7393	24.1
2002.58	2002-08-01	25.7125	25.4495
2002.67	2002-09-01	25.9477	24.8413
2002.75	2002-10-01	24.4517	25.9662
2002.83	2002-11-01	26.4534	25.2036
2002.92	2002-12-01	25.9503	24.9972
2003	2003-01-01	23.5098	24.2768
2003.08	2003-02-01	21.3082	23.0511
2003.17	2003-03-01	22.0415	23.2404
2003.25	2003-04-01	21.9481	24.0919
2003.33	2003-05-01	25.0123	24.5676
2003.42	2003-06-01	26.2329	25.0175
2003.5	2003-07-01	25.9593	25.4262
2003.58	2003-08-01	26.7605	25.7558
2003.67	2003-09-01	26.1378	27.2743
2003.75	2003-10-01	25.6396	28.071
2003.83	2003-11-01	25.6661	27.3245
2003.92	2003-12-01	23.856	27.8512
2004	2004-01-01	23.415	27.4742
2004.08	2004-02-01	22.567	25.9076
2004.17	2004-03-01	23.7951	24.4465
2004.25	2004-04-01	25.6505	24.3717
2004.33	2004-05-01	26.4674	22.7955
2004.42	2004-06-01	25.1811	23.6253
2004.5	2004-07-01	26.727	26.8185
2004.58	2004-08-01	27.9909	27.5587
2004.67	2004-09-01	28.1648	27.8201
2004.75	2004-10-01	27.6823	27.3591
2004.83	2004-11-01	26.203	26.9329
2004.92	2004-12-01	23.8425	26.4315
2005	2005-01-01	23.9216	25.4971
2005.08	2005-02-01	23.0043	25.4462
2005.17	2005-03-01	23.5761	24.0704
2005.25	2005-04-01	26.7735	23.7195
2005.33	2005-05-01	27.2538	24.1981
2005.42	2005-06-01	26.9894	25.7561
2005.5	2005-07-01	26.7543	26.3466
2005.58	2005-08-01	27.6747	26.0699
2005.67	2005-09-01	24.9498	27.8813
2005.75	2005-10-01	25.7133	27.5377
2005.83	2005-11-01	23.1687	28.4462
2005.92	2005-12-01	23.1438	27.4232
2006	2006-01-01	23.7236	26.8835
2006.08	2006-02-01	22.2503	25.2149
2006.17	2006-03-01	23.6702	24.4414
2006.25	2006-04-01	24.0839	23.6341
2006.33	2006-05-01	22.4273	22.8226
2006.42	2006-06-01	22.1274	22.894
2006.5	2006-07-01	22.3999	25.2623
2006.58	2006-08-01	24.3397	26.3993
2006.67	2006-09-01	24.1295	27.2797
2006.75	2006-10-01	21.3579	27.4383
2006.83	2006-11-01	20.536	27.2238
2006.92	2006-12-01	20.549	26.9174
2007	2007-01-01	20.5048	25.4932
2007.08	2007-02-01	20.4495	23.5545
2007.17	2007-03-01	21.2403	22.791
2007.25	2007-04-01	21.333	23.9525
2007.33	2007-05-01	23.1539	24.931
2007.42	2007-06-01	24.3321	25.8099
2007.5	2007-07-01	25.1423	26.005
2007.58	2007-08-01	26.1164	26.0366
2007.67	2007-09-01	25.1318	27.1252
2007.75	2007-10-01	24.7185	26.8276
2007.83	2007-11-01	23.2615	27.4045
2007.92	2007-12-01	20.4832	27.3715
2008	2008-01-01	20.8132	25.2216
2008.08	2008-02-01	19.6224	23.196
2008.17	2008-03-01	21.5968	24.0171
2008.25	2008-04-01	22.7571	23.1734
2008.33	2008-05-01	20.5689	23.5924
2008.42	2008-06-01	21.9524	23.9869
2008.5	2008-07-01	27.2346	25.7992
2008.58	2008-08-01	27.6532	26.0661
2008.67	2008-09-01	26.2348	26.744
2008.75	2008-10-01	24.1071	26.4046
2008.83	2008-11-01	21.2054	25.9643
2008.92	2008-12-01	21.9224	25.106
2009	2009-01-01	20.6371	24.5025
2009.08	2009-02-01	19.8614	23.4059
2009.17	2009-03-01	21.301	22.051
2009.25	2009-04-01	22.8949	22.6889
2009.33	2009-05-01	24.4374	22.7026
2009.42	2009-06-01	24.9322	24.0435
2009.5	2009-07-01	25.041	26.0029
2009.58	2009-08-01	25.1535	26.2447
2009.67	2009-09-01	24.7626	27.0607
2009.75	2009-10-01	24.5126	27.5769
2009.83	2009-11-01	22.0227	26.2081
2009.92	2009-12-01	22.9583	25.707
2010	2010-01-01	22.2016	23.8931
2010.08	2010-02-01	21.8075	23.293
2010.17	2010-03-01	22.3387	23.1949
2010.25	2010-04-01	23.0895	23.2262
2010.33	2010-05-01	24.1023	23.7371
2010.42	2010-06-01	24.909	23.6267
2010.5	2010-07-01	25.5619	24.6067
2010.58	2010-08-01	25.9213	25.4321
2010.67	2010-09-01	25.8308	24.8615
2010.75	2010-10-01	23.8503	26.734
2010.83	2010-11-01	24.0929	25.0928
2010.92	2010-12-01	24.6369	24.9563
2011	2011-01-01	24.4408	25.1878
2011.08	2011-02-01	21.4034	24.1462
2011.17	2011-03-01	21.4645	23.0156
2011.25	2011-04-01	22.0935	22.4828
2011.33	2011-05-01	23.3759	24.1717
2011.42	2011-06-01	24.4643	25.1633
2011.5	2011-07-01	25.3895	26.3922
2011.58	2011-08-01	26.2043	26.0454
2011.67	2011-09-01	25.6283	26.0636
2011.75	2011-10-01	24.7344	27.1608
2011.83	2011-11-01	23.2302	26.0532
2011.92	2011-12-01	22.4768	25.8148
2012	2012-01-01	24.3602	23.3233
2012.08	2012-02-01	20.0308	22.9851
2012.17	2012-03-01	20.8744	21.8482
2012.25	2012-04-01	20.6429	21.8719
2012.33	2012-05-01	22.3775	23.4995
2012.42	2012-06-01	23.1736	24.0875
2012.5	2012-07-01	23.6167	25.2372
2012.58	2012-08-01	23.442	25.9367
2012.67	2012-09-01	22.5213	26.0925
2012.75	2012-10-01	20.7652	25.3424
2012.83	2012-11-01	21.0906	25.5409
2012.92	2012-12-01	21.0481	25.2634
2013	2013-01-01	20.2351	23.2879
2013.08	2013-02-01	18.3823	21.3884
2013.17	2013-03-01	19.2705	21.5187
2013.25	2013-04-01	20.5485	21.6509
2013.33	2013-05-01	20.2023	22.5564
2013.42	2013-06-01	21.3268	23.532
2013.5	2013-07-01	25.2789	23.6527
2013.58	2013-08-01	26.3355	24.2929
2013.67	2013-09-01	26.7602	25.1001
2013.75	2013-10-01	26.0801	25.439
2013.83	2013-11-01	24.4238	25.4443
2013.92	2013-12-01	22.7808	24.5328
2014	2014-01-01	22.0141	22.382
2014.08	2014-02-01	21.8019	21.4331
2014.17	2014-03-01	22.933	20.2073
2014.25	2014-04-01	23.7812	21.3692
2014.33	2014-05-01	23.0505	21.5801
2014.42	2014-06-01	25.397	22.3552
2014.5	2014-07-01	26.4699	23.2131
2014.58	2014-08-01	26.3845	24.0847
2014.67	2014-09-01	26.6275	25.0069
2014.75	2014-10-01	24.8311	25.43
2014.83	2014-11-01	23.6459	23.9459
2014.92	2014-12-01	23.6999	24.6253
2015	2015-01-01	23.8116	22.3179
2015.08	2015-02-01	22.7725	#N/A
2015.17	2015-03-01	24.6167	#N/A
2015.25	2015-04-01	25.5851	#N/A
2015.33	2015-05-01	27.0648	#N/A
2015.42	2015-06-01	27.0604	#N/A
2015.5	2015-07-01	28.0146	#N/A
2015.58	2015-08-01	28.9046	#N/A
2015.67	2015-09-01	28.446	#N/A
2015.75	2015-10-01	26.1898	#N/A
2015.83	2015-11-01	25.7737	#N/A
2015.92	2015-12-01	24.2383	#N/A
2016	2016-01-01	24.8449	#N/A
2016.08	2016-02-01	22.9509	#N/A
2016.17	2016-03-01	24.3097	#N/A
2016.25	2016-04-01	24.5647	#N/A
2016.33	2016-05-01	26.9305	#N/A
2016.42	2016-06-01	27.284	#N/A
2016.5	2016-07-01	27.3716	#N/A
2016.58	2016-08-01	26.7953	#N/A
2016.67	2016-09-01	27.0097	#N/A
2016.75	2016-10-01	26.0899	#N/A
2016.83	2016-11-01	25.7108	24.2787
2016.92	2016-12-01	24.9921	24.9363
2017	2017-01-01	23.8604	23.877
2017.08	2017-02-01	23.1061	22.4111
2017.17	2017-03-01	23.9188	21.4347
2017.25	2017-04-01	25.1854	24.3559
2017.33	2017-05-01	26.5815	24.6075
2017.42	2017-06-01	26.9301	26.2734
2017.5	2017-07-01	26.9165	26.6507
2017.58	2017-08-01	27.1102	27.1978
2017.67	2017-09-01	27.1179	27.6966
2017.75	2017-10-01	27.0365	27.4301
2017.83	2017-11-01	25.3343	24.2872
2017.92	2017-12-01	24.9992	23.5675
2018	2018-01-01	23.8866	23.531
2018.08	2018-02-01	23.7371	22.944
2018.17	2018-03-01	23.2642	22.4268
2018.25	2018-04-01	23.4877	22.6224
2018.33	2018-05-01	23.8591	24.0919
2018.42	2018-06-01	26.0995	24.9384
2018.5	2018-07-01	27.1046	24.7705
2018.58	2018-08-01	27.2393	25.1489
2018.67	2018-09-01	27.5968	27.1801
2018.75	2018-10-01	27.3595	27.47
2018.83	2018-11-01	26.3947	27.2463
2018.92	2018-12-01	25.2964	25.5984
2019	2019-01-01	25.2544	23.4772
2019.08	2019-02-01	23.9213	23.1489
2019.17	2019-03-01	24.3905	21.4887
2019.25	2019-04-01	24.9053	24.1068
2019.33	2019-05-01	25.1368	26.5453
2019.42	2019-06-01	27.1465	28.5444
2019.5	2019-07-01	27.3523	28.9431
2019.58	2019-08-01	26.916	29.6224
2019.67	2019-09-01	26.5438	28.9129

## Sheet: scenario C
year	date	Makai Pier SST	Ko'Olina SST
1908.58	1908-08-01	22.9251
1908.67	1908-09-01	24.264
1908.75	1908-10-01	23.0568
1908.83	1908-11-01	22.8022
1908.92	1908-12-01	21.8604
1909	1909-01-01	21.3216
1909.08	1909-02-01	19.7231
1909.17	1909-03-01	20.1668
1909.25	1909-04-01	21.9949
1909.33	1909-05-01	24.1688
1909.42	1909-06-01	23.0665
1909.5	1909-07-01	22.1281
1909.58	1909-08-01	24.034
1909.67	1909-09-01	23.631
1909.75	1909-10-01	22.6429
1909.83	1909-11-01	21.2449
1909.92	1909-12-01	19.5441
1910	1910-01-01	18.0908
1910.08	1910-02-01	17.2801
1910.17	1910-03-01	18.6368
1910.25	1910-04-01	19.6681
1910.33	1910-05-01	20.4463
1910.42	1910-06-01	21.1936
1910.5	1910-07-01	21.2023
1910.58	1910-08-01	#N/A
1910.67	1910-09-01	#N/A
1910.75	1910-10-01	20.3234
1910.83	1910-11-01	21.0994
1910.92	1910-12-01	21.1419
1911	1911-01-01	20.0009
1911.08	1911-02-01	17.3364
1911.17	1911-03-01	17.459
1911.25	1911-04-01	18.5861
1911.33	1911-05-01	20.4829
1911.42	1911-06-01	21.5752
1911.5	1911-07-01	22.6323
1911.58	1911-08-01	24.2403
1911.67	1911-09-01	24.8686
1911.75	1911-10-01	23.4076
1911.83	1911-11-01	23.5778
1911.92	1911-12-01	22.8584
1912	1912-01-01	22.1268
1912.08	1912-02-01	19.3741
1912.17	1912-03-01	20.3513
1912.25	1912-04-01	21.5748
1912.33	1912-05-01	22.32
1912.42	1912-06-01	22.8148
1912.5	1912-07-01	21.8113
1912.58	1912-08-01	23.2372
1912.67	1912-09-01	23.5366
1912.75	1912-10-01	22.8739
1912.83	1912-11-01	22.6734
1912.92	1912-12-01	22.2681
1913	1913-01-01	21.5236
1913.08	1913-02-01	20.3903
1913.17	1913-03-01	21.1201
1913.25	1913-04-01	22.0132
1913.33	1913-05-01	22.9547
1913.42	1913-06-01	23.8895
1913.5	1913-07-01	24.7356
1913.58	1913-08-01	25.3868
1913.67	1913-09-01	24.8789
1913.75	1913-10-01	23.9599
1913.83	1913-11-01	24.2268
1913.92	1913-12-01	23.3224
1914	1914-01-01	20.4367
1914.08	1914-02-01	19.8087
1914.17	1914-03-01	20.7355
1914.25	1914-04-01	20.4366
1914.33	1914-05-01	20.9752
1914.42	1914-06-01	20.9085
1914.5	1914-07-01	22.2913
1914.58	1914-08-01	23.6126
1914.67	1914-09-01	23.1306
1914.75	1914-10-01	22.9732
1914.83	1914-11-01	22.8162
1914.92	1914-12-01	21.064
1915	1915-01-01	20.9544
1915.08	1915-02-01	19.3867
1915.17	1915-03-01	20.8934
1915.25	1915-04-01	22.6966
1915.33	1915-05-01	23.4865
1915.42	1915-06-01	23.537
1915.5	1915-07-01	23.3986
1915.58	1915-08-01	23.7107
1915.67	1915-09-01	22.7956
1915.75	1915-10-01	22.7599
1915.83	1915-11-01	21.9275
1915.92	1915-12-01	20.783
1916	1916-01-01	20.1862
1916.08	1916-02-01	19.555
1916.17	1916-03-01	20.1448
1916.25	1916-04-01	20.6599
1916.33	1916-05-01	21.5794
1916.42	1916-06-01	22.9026
1916.5	1916-07-01	23.4799
1916.58	1916-08-01	23.7583
1916.67	1916-09-01	22.5639
1916.75	1916-10-01	20.3847
1916.83	1916-11-01	19.9305
1916.92	1916-12-01	19.5489
1917	1917-01-01	18.9711
1917.08	1917-02-01	18.2607
1917.17	1917-03-01	19.0261
1917.25	1917-04-01	19.6455
1917.33	1917-05-01	20.237
1917.42	1917-06-01	20.7511
1917.5	1917-07-01	20.483
1917.58	1917-08-01	#N/A
1917.67	1917-09-01	#N/A
1917.75	1917-10-01	#N/A
1917.83	1917-11-01	#N/A
1917.92	1917-12-01	#N/A
1918	1918-01-01	#N/A
1918.08	1918-02-01	#N/A
1918.17	1918-03-01	#N/A
1918.25	1918-04-01	#N/A
1918.33	1918-05-01	#N/A
1918.42	1918-06-01	#N/A
1918.5	1918-07-01	#N/A
1918.58	1918-08-01	#N/A
1918.67	1918-09-01	#N/A
1918.75	1918-10-01	#N/A
1918.83	1918-11-01	#N/A
1918.92	1918-12-01	#N/A
1919	1919-01-01	#N/A
1919.08	1919-02-01	#N/A
1919.17	1919-03-01	#N/A
1919.25	1919-04-01	#N/A
1919.33	1919-05-01	#N/A
1919.42	1919-06-01	#N/A
1919.5	1919-07-01	#N/A
1919.58	1919-08-01	#N/A
1919.67	1919-09-01	#N/A
1919.75	1919-10-01	#N/A
1919.83	1919-11-01	#N/A
1919.92	1919-12-01	#N/A
1920	1920-01-01	#N/A
1920.08	1920-02-01	#N/A
1920.17	1920-03-01	#N/A
1920.25	1920-04-01	#N/A
1920.33	1920-05-01	#N/A
1920.42	1920-06-01	#N/A
1920.5	1920-07-01	#N/A
1920.58	1920-08-01	#N/A
1920.67	1920-09-01	#N/A
1920.75	1920-10-01	#N/A
1920.83	1920-11-01	#N/A
1920.92	1920-12-01	#N/A
1921	1921-01-01	#N/A
1921.08	1921-02-01	#N/A
1921.17	1921-03-01	#N/A
1921.25	1921-04-01	#N/A
1921.33	1921-05-01	#N/A
1921.42	1921-06-01	#N/A
1921.5	1921-07-01	#N/A
1921.58	1921-08-01	#N/A
1921.67	1921-09-01	#N/A
1921.75	1921-10-01	#N/A
1921.83	1921-11-01	#N/A
1921.92	1921-12-01	#N/A
1922	1922-01-01	#N/A
1922.08	1922-02-01	#N/A
1922.17	1922-03-01	19.035
1922.25	1922-04-01	19.8496
1922.33	1922-05-01	19.6491
1922.42	1922-06-01	21.2211
1922.5	1922-07-01	21.2519
1922.58	1922-08-01	21.4491
1922.67	1922-09-01	21.3816
1922.75	1922-10-01	21.5971
1922.83	1922-11-01	21.6259
1922.92	1922-12-01	20.7946
1923	1923-01-01	20.224
1923.08	1923-02-01	18.2243
1923.17	1923-03-01	19.266
1923.25	1923-04-01	20.2548
1923.33	1923-05-01	21.1397
1923.42	1923-06-01	23.3875
1923.5	1923-07-01	23.5506
1923.58	1923-08-01	23.5538
1923.67	1923-09-01	23.681
1923.75	1923-10-01	23.4677
1923.83	1923-11-01	21.0044
1923.92	1923-12-01	20.8711
1924	1924-01-01	20.3569
1924.08	1924-02-01	20.0618
1924.17	1924-03-01	21.272
1924.25	1924-04-01	22.5657
1924.33	1924-05-01	23.0863
1924.42	1924-06-01	23.4731
1924.5	1924-07-01	23.621
1924.58	1924-08-01	23.6735
1924.67	1924-09-01	23.6868
1924.75	1924-10-01	23.6029
1924.83	1924-11-01	23.1774
1924.92	1924-12-01	22.3979
1925	1925-01-01	21.1668
1925.08	1925-02-01	19.4447
1925.17	1925-03-01	19.604
1925.25	1925-04-01	19.6988
1925.33	1925-05-01	19.6469
1925.42	1925-06-01	19.8925
1925.5	1925-07-01	#N/A
1925.58	1925-08-01	#N/A
1925.67	1925-09-01	#N/A
1925.75	1925-10-01	#N/A
1925.83	1925-11-01	#N/A
1925.92	1925-12-01	#N/A
1926	1926-01-01	#N/A
1926.08	1926-02-01	#N/A
1926.17	1926-03-01	19.4023
1926.25	1926-04-01	21.0088
1926.33	1926-05-01	22.7885
1926.42	1926-06-01	23.0682
1926.5	1926-07-01	24.2995
1926.58	1926-08-01	24.7008
1926.67	1926-09-01	25.2403
1926.75	1926-10-01	25.1408
1926.83	1926-11-01	24.1553
1926.92	1926-12-01	23.8918
1927	1927-01-01	22.2046
1927.08	1927-02-01	21.0691
1927.17	1927-03-01	23.5692
1927.25	1927-04-01	23.3877
1927.33	1927-05-01	23.0302
1927.42	1927-06-01	23.7968
1927.5	1927-07-01	23.528
1927.58	1927-08-01	23.9628
1927.67	1927-09-01	23.8031
1927.75	1927-10-01	23.5462
1927.83	1927-11-01	23.8999
1927.92	1927-12-01	23.8066
1928	1928-01-01	22.0625
1928.08	1928-02-01	21.2783
1928.17	1928-03-01	21.5853
1928.25	1928-04-01	21.7784
1928.33	1928-05-01	22.158
1928.42	1928-06-01	24.2124
1928.5	1928-07-01	24.2336
1928.58	1928-08-01	25.4711
1928.67	1928-09-01	24.7121
1928.75	1928-10-01	22.7873
1928.83	1928-11-01	22.3834
1928.92	1928-12-01	22.393
1929	1929-01-01	22.0887
1929.08	1929-02-01	20.9059
1929.17	1929-03-01	22.6201
1929.25	1929-04-01	23.9852
1929.33	1929-05-01	24.0561
1929.42	1929-06-01	25.5944
1929.5	1929-07-01	25.4331
1929.58	1929-08-01	26.3142
1929.67	1929-09-01	25.2152
1929.75	1929-10-01	25.6696
1929.83	1929-11-01	24.0501
1929.92	1929-12-01	23.4535
1930	1930-01-01	21.7208
1930.08	1930-02-01	19.3582
1930.17	1930-03-01	19.6153
1930.25	1930-04-01	20.4402
1930.33	1930-05-01	21.5586
1930.42	1930-06-01	22.6608
1930.5	1930-07-01	24.0716
1930.58	1930-08-01	24.8784
1930.67	1930-09-01	23.7348
1930.75	1930-10-01	23.9118
1930.83	1930-11-01	24
1930.92	1930-12-01	22.9333
1931	1931-01-01	21.0545
1931.08	1931-02-01	18.0371
1931.17	1931-03-01	20.0603
1931.25	1931-04-01	21.4461
1931.33	1931-05-01	22.4443
1931.42	1931-06-01	22.9343
1931.5	1931-07-01	22.8951
1931.58	1931-08-01	22.8957
1931.67	1931-09-01	22.8101
1931.75	1931-10-01	21.7716
1931.83	1931-11-01	20.8024
1931.92	1931-12-01	19.7687
1932	1932-01-01	18.5176
1932.08	1932-02-01	17.8992
1932.17	1932-03-01	19.7441
1932.25	1932-04-01	20.7604
1932.33	1932-05-01	21.7008
1932.42	1932-06-01	23.0596
1932.5	1932-07-01	22.8802
1932.58	1932-08-01	23.0696
1932.67	1932-09-01	22.7313
1932.75	1932-10-01	21.5297
1932.83	1932-11-01	#N/A
1932.92	1932-12-01	#N/A
1933	1933-01-01	#N/A
1933.08	1933-02-01	#N/A
1933.17	1933-03-01	#N/A
1933.25	1933-04-01	#N/A
1933.33	1933-05-01	#N/A
1933.42	1933-06-01	#N/A
1933.5	1933-07-01	#N/A
1933.58	1933-08-01	#N/A
1933.67	1933-09-01	#N/A
1933.75	1933-10-01	#N/A
1933.83	1933-11-01	#N/A
1933.92	1933-12-01	#N/A
1934	1934-01-01	#N/A
1934.08	1934-02-01	#N/A
1934.17	1934-03-01	#N/A
1934.25	1934-04-01	#N/A
1934.33	1934-05-01	#N/A
1934.42	1934-06-01	#N/A
1934.5	1934-07-01	#N/A
1934.58	1934-08-01	#N/A
1934.67	1934-09-01	#N/A
1934.75	1934-10-01	#N/A
1934.83	1934-11-01	#N/A
1934.92	1934-12-01	#N/A
1935	1935-01-01	#N/A
1935.08	1935-02-01	#N/A
1935.17	1935-03-01	#N/A
1935.25	1935-04-01	#N/A
1935.33	1935-05-01	#N/A
1935.42	1935-06-01	#N/A
1935.5	1935-07-01	#N/A
1935.58	1935-08-01	#N/A
1935.67	1935-09-01	#N/A
1935.75	1935-10-01	#N/A
1935.83	1935-11-01	#N/A
1935.92	1935-12-01	#N/A
1936	1936-01-01	#N/A
1936.08	1936-02-01	#N/A
1936.17	1936-03-01	#N/A
1936.25	1936-04-01	#N/A
1936.33	1936-05-01	#N/A
1936.42	1936-06-01	#N/A
1936.5	1936-07-01	#N/A
1936.58	1936-08-01	#N/A
1936.67	1936-09-01	#N/A
1936.75	1936-10-01	#N/A
1936.83	1936-11-01	#N/A
1936.92	1936-12-01	#N/A
1937	1937-01-01	#N/A
1937.08	1937-02-01	#N/A
1937.17	1937-03-01	#N/A
1937.25	1937-04-01	#N/A
1937.33	1937-05-01	#N/A
1937.42	1937-06-01	#N/A
1937.5	1937-07-01	#N/A
1937.58	1937-08-01	#N/A
1937.67	1937-09-01	#N/A
1937.75	1937-10-01	24.2758
1937.83	1937-11-01	23.8059
1937.92	1937-12-01	22.7398
1938	1938-01-01	21.2441
1938.08	1938-02-01	20.9585
1938.17	1938-03-01	21.3837
1938.25	1938-04-01	21.7132
1938.33	1938-05-01	21.7834
1938.42	1938-06-01	22.5779
1938.5	1938-07-01	23.53
1938.58	1938-08-01	24.1132
1938.67	1938-09-01	24.1964
1938.75	1938-10-01	23.8938
1938.83	1938-11-01	23.6604
1938.92	1938-12-01	24.0228
1939	1939-01-01	23.3266
1939.08	1939-02-01	20.6424
1939.17	1939-03-01	22.157
1939.25	1939-04-01	21.4373
1939.33	1939-05-01	20.8656
1939.42	1939-06-01	20.8152
1939.5	1939-07-01	22.6111
1939.58	1939-08-01	24.2411
1939.67	1939-09-01	24.6181
1939.75	1939-10-01	24.4073
1939.83	1939-11-01	24.5781
1939.92	1939-12-01	21.8835
1940	1940-01-01	18.3032
1940.08	1940-02-01	#N/A
1940.17	1940-03-01	#N/A
1940.25	1940-04-01	#N/A
1940.33	1940-05-01	#N/A
1940.42	1940-06-01	#N/A
1940.5	1940-07-01	#N/A
1940.58	1940-08-01	#N/A
1940.67	1940-09-01	#N/A
1940.75	1940-10-01	#N/A
1940.83	1940-11-01	#N/A
1940.92	1940-12-01	24.8136
1941	1941-01-01	23.4563
1941.08	1941-02-01	22.8551
1941.17	1941-03-01	22.9356
1941.25	1941-04-01	24.0043
1941.33	1941-05-01	25.0501
1941.42	1941-06-01	25.194
1941.5	1941-07-01	25.0934
1941.58	1941-08-01	25.8469
1941.67	1941-09-01	24.8146
1941.75	1941-10-01	25.6364
1941.83	1941-11-01	24.5209
1941.92	1941-12-01	21.3996
1942	1942-01-01	20.9479
1942.08	1942-02-01	19.8458
1942.17	1942-03-01	22.2163
1942.25	1942-04-01	22.593
1942.33	1942-05-01	23.042
1942.42	1942-06-01	23.718
1942.5	1942-07-01	25.4612
1942.58	1942-08-01	24.5542
1942.67	1942-09-01	23.9651
1942.75	1942-10-01	22.9409
1942.83	1942-11-01	22.8125
1942.92	1942-12-01	23.1432
1943	1943-01-01	23.8355
1943.08	1943-02-01	22.373
1943.17	1943-03-01	22.8109
1943.25	1943-04-01	23.2957
1943.33	1943-05-01	24.0323
1943.42	1943-06-01	24.8626
1943.5	1943-07-01	25.5005
1943.58	1943-08-01	26.074
1943.67	1943-09-01	25.6792
1943.75	1943-10-01	24.7384
1943.83	1943-11-01	23.6607
1943.92	1943-12-01	23.0899
1944	1944-01-01	#N/A
1944.08	1944-02-01	#N/A
1944.17	1944-03-01	#N/A
1944.25	1944-04-01	#N/A
1944.33	1944-05-01	#N/A
1944.42	1944-06-01	#N/A
1944.5	1944-07-01	#N/A
1944.58	1944-08-01	#N/A
1944.67	1944-09-01	#N/A
1944.75	1944-10-01	#N/A
1944.83	1944-11-01	#N/A
1944.92	1944-12-01	#N/A
1945	1945-01-01	#N/A
1945.08	1945-02-01	#N/A
1945.17	1945-03-01	#N/A
1945.25	1945-04-01	#N/A
1945.33	1945-05-01	#N/A
1945.42	1945-06-01	#N/A
1945.5	1945-07-01	#N/A
1945.58	1945-08-01	#N/A
1945.67	1945-09-01	#N/A
1945.75	1945-10-01	#N/A
1945.83	1945-11-01	#N/A
1945.92	1945-12-01	#N/A
1946	1946-01-01	#N/A
1946.08	1946-02-01	#N/A
1946.17	1946-03-01	#N/A
1946.25	1946-04-01	#N/A
1946.33	1946-05-01	#N/A
1946.42	1946-06-01	#N/A
1946.5	1946-07-01	#N/A
1946.58	1946-08-01	#N/A
1946.67	1946-09-01	#N/A
1946.75	1946-10-01	#N/A
1946.83	1946-11-01	#N/A
1946.92	1946-12-01	#N/A
1947	1947-01-01	#N/A
1947.08	1947-02-01	#N/A
1947.17	1947-03-01	#N/A
1947.25	1947-04-01	#N/A
1947.33	1947-05-01	#N/A
1947.42	1947-06-01	#N/A
1947.5	1947-07-01	#N/A
1947.58	1947-08-01	#N/A
1947.67	1947-09-01	#N/A
1947.75	1947-10-01	#N/A
1947.83	1947-11-01	#N/A
1947.92	1947-12-01	#N/A
1948	1948-01-01	#N/A
1948.08	1948-02-01	#N/A
1948.17	1948-03-01	#N/A
1948.25	1948-04-01	#N/A
1948.33	1948-05-01	#N/A
1948.42	1948-06-01	#N/A
1948.5	1948-07-01	#N/A
1948.58	1948-08-01	#N/A
1948.67	1948-09-01	#N/A
1948.75	1948-10-01	#N/A
1948.83	1948-11-01	#N/A
1948.92	1948-12-01	#N/A
1949	1949-01-01	#N/A
1949.08	1949-02-01	18.8041
1949.17	1949-03-01	20.1979
1949.25	1949-04-01	20.9272
1949.33	1949-05-01	19.3338
1949.42	1949-06-01	21.2823
1949.5	1949-07-01	24.5592
1949.58	1949-08-01	25.5884
1949.67	1949-09-01	25.0154
1949.75	1949-10-01	24.5306
1949.83	1949-11-01	23.4289
1949.92	1949-12-01	22.3991
1950	1950-01-01	21.7931
1950.08	1950-02-01	20.6775
1950.17	1950-03-01	22.3466
1950.25	1950-04-01	23.6792
1950.33	1950-05-01	23.4881
1950.42	1950-06-01	24.2386
1950.5	1950-07-01	23.0676
1950.58	1950-08-01	25.6029
1950.67	1950-09-01	25.0714
1950.75	1950-10-01	25.0654
1950.83	1950-11-01	24.5955
1950.92	1950-12-01	22.7306
1951	1951-01-01	21.1166
1951.08	1951-02-01	20.6778
1951.17	1951-03-01	20.7724
1951.25	1951-04-01	21.0594
1951.33	1951-05-01	22.2893
1951.42	1951-06-01	23.5683
1951.5	1951-07-01	24.3805
1951.58	1951-08-01	25.2264
1951.67	1951-09-01	24.8583
1951.75	1951-10-01	23.6924
1951.83	1951-11-01	22.8146
1951.92	1951-12-01	22.7254
1952	1952-01-01	20.3489
1952.08	1952-02-01	16.4036
1952.17	1952-03-01	19.628
1952.25	1952-04-01	19.6391
1952.33	1952-05-01	22.0619
1952.42	1952-06-01	21.9223
1952.5	1952-07-01	21.7285
1952.58	1952-08-01	23.0987
1952.67	1952-09-01	22.6319
1952.75	1952-10-01	21.4613
1952.83	1952-11-01	20.6544
1952.92	1952-12-01	19.967
1953	1953-01-01	20.0198
1953.08	1953-02-01	19.027
1953.17	1953-03-01	19.0962
1953.25	1953-04-01	19.6454
1953.33	1953-05-01	20.8831
1953.42	1953-06-01	21.5342
1953.5	1953-07-01	22.8494
1953.58	1953-08-01	24.5028
1953.67	1953-09-01	24.929
1953.75	1953-10-01	24.6174
1953.83	1953-11-01	23.7485
1953.92	1953-12-01	21.6631
1954	1954-01-01	20.7347
1954.08	1954-02-01	19.9986
1954.17	1954-03-01	21.7958
1954.25	1954-04-01	21.675
1954.33	1954-05-01	21.4005
1954.42	1954-06-01	22.5378
1954.5	1954-07-01	24.517
1954.58	1954-08-01	24.839
1954.67	1954-09-01	24.185
1954.75	1954-10-01	23.4141
1954.83	1954-11-01	21.9379
1954.92	1954-12-01	22.08
1955	1955-01-01	19.4031
1955.08	1955-02-01	17.9784
1955.17	1955-03-01	19.106
1955.25	1955-04-01	21.2672
1955.33	1955-05-01	22.7255
1955.42	1955-06-01	24.4299
1955.5	1955-07-01	25.3159
1955.58	1955-08-01	25.4667
1955.67	1955-09-01	25.4312
1955.75	1955-10-01	24.6104
1955.83	1955-11-01	24.0492
1955.92	1955-12-01	23.1619
1956	1956-01-01	22.0065
1956.08	1956-02-01	21.0316
1956.17	1956-03-01	21.5985
1956.25	1956-04-01	23.0768
1956.33	1956-05-01	22.2805
1956.42	1956-06-01	24.9225
1956.5	1956-07-01	26.0359
1956.58	1956-08-01	26.4443
1956.67	1956-09-01	25.366
1956.75	1956-10-01	25.0607
1956.83	1956-11-01	24.8766
1956.92	1956-12-01	22.021
1957	1957-01-01	20.3824
1957.08	1957-02-01	19.2102	#N/A
1957.17	1957-03-01	21.0928	#N/A
1957.25	1957-04-01	22.1534	23.2475
1957.33	1957-05-01	24.1639	21.8801
1957.42	1957-06-01	24.8736	22.4029
1957.5	1957-07-01	25.4657	22.4986
1957.58	1957-08-01	26.1429	23.4639
1957.67	1957-09-01	25.7886	24.1493
1957.75	1957-10-01	24.8406	25.3823
1957.83	1957-11-01	24.5384	24.2902
1957.92	1957-12-01	23.3306	24.4583
1958	1958-01-01	21.4978	22.9479
1958.08	1958-02-01	21.1563	22.2641
1958.17	1958-03-01	21.2527	21.5354
1958.25	1958-04-01	21.44	22.0695
1958.33	1958-05-01	21.5532	23.3516
1958.42	1958-06-01	21.5495	22.9147
1958.5	1958-07-01	22.2407	23.2592
1958.58	1958-08-01	24.7335	24.3081
1958.67	1958-09-01	25.6282	23.9254
1958.75	1958-10-01	25.5386	24.196
1958.83	1958-11-01	24.9627	23.9669
1958.92	1958-12-01	23.8271	24.9124
1959	1959-01-01	22.4345	23.693
1959.08	1959-02-01	22.411	23.0143
1959.17	1959-03-01	23.4396	20.5145
1959.25	1959-04-01	23.1099	20.4709
1959.33	1959-05-01	23.5626	20.792
1959.42	1959-06-01	23.7838	23.1482
1959.5	1959-07-01	24.7194	23.8377
1959.58	1959-08-01	24.8537	24.1205
1959.67	1959-09-01	24.9248	24.495
1959.75	1959-10-01	24.8262	24.7541
1959.83	1959-11-01	24.2164	22.3193
1959.92	1959-12-01	22.7997	22.4806
1960	1960-01-01	22.0046	21.6934
1960.08	1960-02-01	21.9555	20.0228
1960.17	1960-03-01	22.0814	19.1869
1960.25	1960-04-01	22.2755	19.8728
1960.33	1960-05-01	22.918	20.9256
1960.42	1960-06-01	24.0969	23.2495
1960.5	1960-07-01	24.3958	23.8012
1960.58	1960-08-01	25.2896	24.6694
1960.67	1960-09-01	25.2258	25.5479
1960.75	1960-10-01	25.2486	25.4824
1960.83	1960-11-01	23.4377	24.7376
1960.92	1960-12-01	24.2365	23.1969
1961	1961-01-01	22.4583	22.5164
1961.08	1961-02-01	21.9462	21.4353
1961.17	1961-03-01	22.0225	20.1632
1961.25	1961-04-01	22.0686	20.9153
1961.33	1961-05-01	22.5413	23.0344
1961.42	1961-06-01	25.5107	23.2688
1961.5	1961-07-01	25.7835	24.0068
1961.58	1961-08-01	25.8229	23.3135
1961.67	1961-09-01	25.6363	24.4224
1961.75	1961-10-01	25.2729	25.4932
1961.83	1961-11-01	24.7801	24.9683
1961.92	1961-12-01	23.7629	24.6895
1962	1962-01-01	24.1036	22.9345
1962.08	1962-02-01	21.3881	20.343
1962.17	1962-03-01	22.6319	19.1636
1962.25	1962-04-01	23.4047	19.0812
1962.33	1962-05-01	24.5486	19.6836
1962.42	1962-06-01	25.3772	20.1359
1962.5	1962-07-01	25.6231	21.9991
1962.58	1962-08-01	25.8283	24.4424
1962.67	1962-09-01	25.4332	24.1736
1962.75	1962-10-01	25.1671	25.1564
1962.83	1962-11-01	23.8172	24.93
1962.92	1962-12-01	22.016	22.1326
1963	1963-01-01	22.2276	21.3218
1963.08	1963-02-01	20.5581	21.6111
1963.17	1963-03-01	23.2149	21.3945
1963.25	1963-04-01	24.4967	22.777
1963.33	1963-05-01	24.869	24.9533
1963.42	1963-06-01	25.4328	24.113
1963.5	1963-07-01	25.4758	25.0612
1963.58	1963-08-01	26.5068	25.9691
1963.67	1963-09-01	26.2143	26.5955
1963.75	1963-10-01	25.6493	26.6045
1963.83	1963-11-01	24.0812	25.4239
1963.92	1963-12-01	20.7222	25.98
1964	1964-01-01	20.3233	26.0377
1964.08	1964-02-01	20.1919	23.4199
1964.17	1964-03-01	21.3984	22.2777
1964.25	1964-04-01	20.8269	22.979
1964.33	1964-05-01	23.7283	22.2807
1964.42	1964-06-01	25.1221	22.303
1964.5	1964-07-01	25.1969	22.8871
1964.58	1964-08-01	25.4502	23.4612
1964.67	1964-09-01	24.856	24.8579
1964.75	1964-10-01	23.4472	24.8323
1964.83	1964-11-01	22.436	25.6035
1964.92	1964-12-01	20.1448	25.499
1965	1965-01-01	20.2376	23.6213
1965.08	1965-02-01	19.4867	23.8128
1965.17	1965-03-01	20.5054	20.8376
1965.25	1965-04-01	22.3751	21.8219
1965.33	1965-05-01	23.9824	22.5183
1965.42	1965-06-01	25.205	24.5727
1965.5	1965-07-01	24.8876	25.6127
1965.58	1965-08-01	25.8037	25.5678
1965.67	1965-09-01	25.982	26.5537
1965.75	1965-10-01	25.1482	26.7548
1965.83	1965-11-01	24.4201	26.3256
1965.92	1965-12-01	23.8568	22.7094
1966	1966-01-01	#N/A	21.7281
1966.08	1966-02-01	#N/A	23.2403
1966.17	1966-03-01	#N/A	20.3178
1966.25	1966-04-01	#N/A	21.4603
1966.33	1966-05-01	#N/A	21.2391
1966.42	1966-06-01	#N/A	21.8343
1966.5	1966-07-01	#N/A	22.9605
1966.58	1966-08-01	#N/A	24.1645
1966.67	1966-09-01	#N/A	23.6612
1966.75	1966-10-01	#N/A	25.5127
1966.83	1966-11-01	#N/A	26.1948
1966.92	1966-12-01	#N/A	24.2977
1967	1967-01-01	#N/A	21.474
1967.08	1967-02-01	#N/A	23.2782
1967.17	1967-03-01	#N/A	21.0621
1967.25	1967-04-01	#N/A	21.5805
1967.33	1967-05-01	#N/A	21.3609
1967.42	1967-06-01	#N/A	22.8499
1967.5	1967-07-01	#N/A	24.6755
1967.58	1967-08-01	#N/A	24.6502
1967.67	1967-09-01	#N/A	25.8971
1967.75	1967-10-01	#N/A	25.3004
1967.83	1967-11-01	#N/A	22.6329
1967.92	1967-12-01	#N/A	23.5849
1968	1968-01-01	#N/A	23.4845
1968.08	1968-02-01	#N/A	22.2774
1968.17	1968-03-01	#N/A	20.4497
1968.25	1968-04-01	#N/A	21.574
1968.33	1968-05-01	#N/A	22.2495
1968.42	1968-06-01	#N/A	24.9756
1968.5	1968-07-01	#N/A	24.1812
1968.58	1968-08-01	#N/A	24.9105
1968.67	1968-09-01	#N/A	24.4646
1968.75	1968-10-01	#N/A	25.4679
1968.83	1968-11-01	#N/A	24.9709
1968.92	1968-12-01	#N/A	23.1817
1969	1969-01-01	#N/A	21.6147
1969.08	1969-02-01	#N/A	21.7552
1969.17	1969-03-01	24.296	19.9578
1969.25	1969-04-01	24.0801	21.7281
1969.33	1969-05-01	24.2711	22.2738
1969.42	1969-06-01	24.4393	23.4132
1969.5	1969-07-01	24.1477	23.0659
1969.58	1969-08-01	25.1464	25.2183
1969.67	1969-09-01	24.4598	25.1458
1969.75	1969-10-01	24.8915	25.8548
1969.83	1969-11-01	22.2614	25.2815
1969.92	1969-12-01	22.506	24.2433
1970	1970-01-01	22.7902	18.0472
1970.08	1970-02-01	19.4502	20.7004
1970.17	1970-03-01	19.7483	18.4866
1970.25	1970-04-01	20.221	19.1532
1970.33	1970-05-01	20.4765	20.8016
1970.42	1970-06-01	22.5213	21.4435
1970.5	1970-07-01	24.0042	21.1571
1970.58	1970-08-01	25.0434	21.9226
1970.67	1970-09-01	23.6486	24.038
1970.75	1970-10-01	24.0479	23.7476
1970.83	1970-11-01	23.3065	19.9908
1970.92	1970-12-01	21.6349	21.271
1971	1971-01-01	22.4696	19.4558
1971.08	1971-02-01	21.1664	20.1366
1971.17	1971-03-01	21.402	19.1166
1971.25	1971-04-01	22.1061	20.4234
1971.33	1971-05-01	21.6857	22.7249
1971.42	1971-06-01	22.261	23.8161
1971.5	1971-07-01	22.7265	24.0873
1971.58	1971-08-01	24.8366	25.2628
1971.67	1971-09-01	24.7868	25.9403
1971.75	1971-10-01	23.8103	26.1084
1971.83	1971-11-01	22.6145	24.3367
1971.92	1971-12-01	23.0666	25.1252
1972	1972-01-01	22.0476	23.9577
1972.08	1972-02-01	20.3438	22.7742
1972.17	1972-03-01	20.7618	20.5261
1972.25	1972-04-01	21.0561	20.6059
1972.33	1972-05-01	22.3333	23.0399
1972.42	1972-06-01	24.1135	22.9678
1972.5	1972-07-01	24.2731	23.2913
1972.58	1972-08-01	24.5452	24.0985
1972.67	1972-09-01	24.8426	24.416
1972.75	1972-10-01	24.527	24.5228
1972.83	1972-11-01	23.6424	22.8234
1972.92	1972-12-01	22.5707	21.9554
1973	1973-01-01	20.7543	19.2489
1973.08	1973-02-01	20.1963	18.9158
1973.17	1973-03-01	20.9756	18.468
1973.25	1973-04-01	21.0046	19.3687
1973.33	1973-05-01	22.5574	20.2416
1973.42	1973-06-01	24.2107	20.1261
1973.5	1973-07-01	24.0565	21.9885
1973.58	1973-08-01	25.0251	23.047
1973.67	1973-09-01	25.3812	24.7567
1973.75	1973-10-01	24.7967	25.3809
1973.83	1973-11-01	23.9728	23.7405
1973.92	1973-12-01	23.628	22.0968
1974	1974-01-01	23.1813	20.0819
1974.08	1974-02-01	22.4191	19.8273
1974.17	1974-03-01	23.3525	19.4185
1974.25	1974-04-01	23.4403	19.8074
1974.33	1974-05-01	24.4205	20.205
1974.42	1974-06-01	24.8186	22.1226
1974.5	1974-07-01	24.393	24.071
1974.58	1974-08-01	25.2613	25.6246
1974.67	1974-09-01	23.9629	24.8132
1974.75	1974-10-01	24.86	26.1562
1974.83	1974-11-01	23.5542	24.937
1974.92	1974-12-01	22.4755	24.5976
1975	1975-01-01	21.7057	22.528
1975.08	1975-02-01	21.2686	20.8779
1975.17	1975-03-01	22.0171	20.3059
1975.25	1975-04-01	23.0065	21.8421
1975.33	1975-05-01	23.6841	22.1817
1975.42	1975-06-01	23.7453	22.9041
1975.5	1975-07-01	23.922	25.0232
1975.58	1975-08-01	24.1481	24.4692
1975.67	1975-09-01	24.0906	24.4423
1975.75	1975-10-01	23.2623	#N/A
1975.83	1975-11-01	22.8133	#N/A
1975.92	1975-12-01	21.6702	#N/A
1976	1976-01-01	19.8415	#N/A
1976.08	1976-02-01	19.4148	#N/A
1976.17	1976-03-01	21.0704	#N/A
1976.25	1976-04-01	21.7868	#N/A
1976.33	1976-05-01	24.7378	#N/A
1976.42	1976-06-01	25.5399	#N/A
1976.5	1976-07-01	25.9018	#N/A
1976.58	1976-08-01	28.2025	#N/A
1976.67	1976-09-01	25.9498	#N/A
1976.75	1976-10-01	23.1297	#N/A
1976.83	1976-11-01	23.1974	#N/A
1976.92	1976-12-01	22.9848	#N/A
1977	1977-01-01	22.5311	#N/A
1977.08	1977-02-01	21.7097	#N/A
1977.17	1977-03-01	22.0101	#N/A
1977.25	1977-04-01	22.3152	#N/A
1977.33	1977-05-01	22.5619	#N/A
1977.42	1977-06-01	23.3485	#N/A
1977.5	1977-07-01	24.2764	#N/A
1977.58	1977-08-01	25.1532	#N/A
1977.67	1977-09-01	24.4982	#N/A
1977.75	1977-10-01	23.9063	#N/A
1977.83	1977-11-01	24.6488	#N/A
1977.92	1977-12-01	25.0351	#N/A
1978	1978-01-01	21.4764	#N/A
1978.08	1978-02-01	20.97	#N/A
1978.17	1978-03-01	21.801	#N/A
1978.25	1978-04-01	21.3651	#N/A
1978.33	1978-05-01	22.4123	#N/A
1978.42	1978-06-01	23.6222	#N/A
1978.5	1978-07-01	24.9706	#N/A
1978.58	1978-08-01	25.6373	#N/A
1978.67	1978-09-01	25.4236	#N/A
1978.75	1978-10-01	23.1631	#N/A
1978.83	1978-11-01	23.4242	#N/A
1978.92	1978-12-01	22.1428	#N/A
1979	1979-01-01	20.8577	#N/A
1979.08	1979-02-01	20.341	#N/A
1979.17	1979-03-01	21.1933	#N/A
1979.25	1979-04-01	20.8218	#N/A
1979.33	1979-05-01	21.3859	#N/A
1979.42	1979-06-01	23.9939	#N/A
1979.5	1979-07-01	25.0729	#N/A
1979.58	1979-08-01	26.1887	#N/A
1979.67	1979-09-01	26.306	#N/A
1979.75	1979-10-01	25.794	#N/A
1979.83	1979-11-01	25.1151	27.7462
1979.92	1979-12-01	23.4871	26.6777
1980	1980-01-01	20.9837	25.8529
1980.08	1980-02-01	20.1027	22.9336
1980.17	1980-03-01	21.1856	22.5196
1980.25	1980-04-01	22.4957	22.5781
1980.33	1980-05-01	22.4448	22.3149
1980.42	1980-06-01	24.5177	22.7963
1980.5	1980-07-01	23.7673	25.3228
1980.58	1980-08-01	25.0887	25.9621
1980.67	1980-09-01	25.0013	26.2535
1980.75	1980-10-01	22.2885	26.3884
1980.83	1980-11-01	22.7996	27.0599
1980.92	1980-12-01	21.775	25.968
1981	1981-01-01	21.6901	24.6778
1981.08	1981-02-01	20.6967	21.5224
1981.17	1981-03-01	21.2457	21.1993
1981.25	1981-04-01	22.4346	21.5792
1981.33	1981-05-01	23.0972	22.4929
1981.42	1981-06-01	24.6313	24.0698
1981.5	1981-07-01	24.9603	24.5445
1981.58	1981-08-01	26.3363	26.2649
1981.67	1981-09-01	25.5104	25.2594
1981.75	1981-10-01	24.2838	25.5132
1981.83	1981-11-01	23.1346	24.0449
1981.92	1981-12-01	22.8664	23.1944
1982	1982-01-01	21.5743	22.7803
1982.08	1982-02-01	21.2125	21.5844
1982.17	1982-03-01	21.6029	20.9568
1982.25	1982-04-01	21.6867	20.6109
1982.33	1982-05-01	21.5706	21.854
1982.42	1982-06-01	23.9185	23.7535
1982.5	1982-07-01	23.6231	25.8077
1982.58	1982-08-01	24.8533	26.2202
1982.67	1982-09-01	26.0787	26.2429
1982.75	1982-10-01	24.512	24.4378
1982.83	1982-11-01	23.7714	23.7438
1982.92	1982-12-01	22.3179	20.5765
1983	1983-01-01	22.2553	20.9082
1983.08	1983-02-01	21.6624	21.0112
1983.17	1983-03-01	22.6277	20.6713
1983.25	1983-04-01	23.3554	20.8681
1983.33	1983-05-01	23.4595	21.3257
1983.42	1983-06-01	23.6533	21.5576
1983.5	1983-07-01	#N/A	23.616
1983.58	1983-08-01	#N/A	24.9976
1983.67	1983-09-01	#N/A	25.7687
1983.75	1983-10-01	#N/A	26.7451
1983.83	1983-11-01	#N/A	26.9127
1983.92	1983-12-01	23.3488	21.8665
1984	1984-01-01	23.0265	20.0844
1984.08	1984-02-01	22.0895	21.0401
1984.17	1984-03-01	22.9061	21.2814
1984.25	1984-04-01	22.4396	20.5194
1984.33	1984-05-01	22.9538	24.6001
1984.42	1984-06-01	24.1258	27.5476
1984.5	1984-07-01	25.0153	25.3596
1984.58	1984-08-01	26.3283	27.8187
1984.67	1984-09-01	26.6074	27.2646
1984.75	1984-10-01	25.7564	28.6242
1984.83	1984-11-01	26.3134	25.8122
1984.92	1984-12-01	25.6372	24.5685
1985	1985-01-01	21.3885	24.9249
1985.08	1985-02-01	20.4019	22.9345
1985.17	1985-03-01	22.3645	23.9202
1985.25	1985-04-01	21.0783	22.2242
1985.33	1985-05-01	21.2042	22.8923
1985.42	1985-06-01	21.1017	23.847
1985.5	1985-07-01	22.5452	22.2712
1985.58	1985-08-01	26.318	24.7183
1985.67	1985-09-01	26.1992	26.1633
1985.75	1985-10-01	26.0446	24.5068
1985.83	1985-11-01	25.3213	23.9539
1985.92	1985-12-01	22.0847	24.6759
1986	1986-01-01	20.8626	23.3491
1986.08	1986-02-01	20.5659	23.2221
1986.17	1986-03-01	21.4958	21.3868
1986.25	1986-04-01	21.8986	21.7522
1986.33	1986-05-01	23.8784	22.1664
1986.42	1986-06-01	25.8325	23.4825
1986.5	1986-07-01	26.142	25.2051
1986.58	1986-08-01	26.5445	27.6851
1986.67	1986-09-01	27.6858	27.3299
1986.75	1986-10-01	27.5478	27.4308
1986.83	1986-11-01	26.0492	26.8529
1986.92	1986-12-01	23.9781	25.8766
1987	1987-01-01	24.0949	26.3025
1987.08	1987-02-01	22.5267	24.4897
1987.17	1987-03-01	22.9317	24.0901
1987.25	1987-04-01	23.068	21.2023
1987.33	1987-05-01	23.0991	22.742
1987.42	1987-06-01	24.2932	24.1532
1987.5	1987-07-01	27.125	24.2421
1987.58	1987-08-01	27.9485	#N/A
1987.67	1987-09-01	27.8083	#N/A
1987.75	1987-10-01	26.7957	#N/A
1987.83	1987-11-01	26.4482	23.7776
1987.92	1987-12-01	24.7004	24.2633
1988	1988-01-01	23.2497	22.631
1988.08	1988-02-01	22.7893	#N/A
1988.17	1988-03-01	23.2382	22.825
1988.25	1988-04-01	23.1086	21.8219
1988.33	1988-05-01	24.4102	23.2312
1988.42	1988-06-01	26.5152	21.5256
1988.5	1988-07-01	26.6068	#N/A
1988.58	1988-08-01	27.4652	#N/A
1988.67	1988-09-01	27.5175	#N/A
1988.75	1988-10-01	26.8434	25.2136
1988.83	1988-11-01	25.4836	23.9893
1988.92	1988-12-01	24.3941	22.9463
1989	1989-01-01	22.8498	22.5684
1989.08	1989-02-01	21.651	21.3764
1989.17	1989-03-01	21.735	20.476
1989.25	1989-04-01	22.0369	21.2109
1989.33	1989-05-01	23.7836	20.4324
1989.42	1989-06-01	26.1727	19.9685
1989.5	1989-07-01	26.6216	20.4108
1989.58	1989-08-01	26.6612	21.2359
1989.67	1989-09-01	26.2525	23.3271
1989.75	1989-10-01	25.8715	24.6047
1989.83	1989-11-01	24.8507	23.7308
1989.92	1989-12-01	22.1215	23.9566
1990	1990-01-01	22.8619	22.236
1990.08	1990-02-01	21.8606	23.1584
1990.17	1990-03-01	23.2076	21.0835
1990.25	1990-04-01	25.0838	21.487
1990.33	1990-05-01	26.1818	21.1471
1990.42	1990-06-01	25.7611	21.6534
1990.5	1990-07-01	26.1791	22.7378
1990.58	1990-08-01	26.9864	22.8496
1990.67	1990-09-01	27.272	23.2418
1990.75	1990-10-01	26.4683	25.2042
1990.83	1990-11-01	24.1677	26.2232
1990.92	1990-12-01	23.5197	26.9752
1991	1991-01-01	22.5058	25.79
1991.08	1991-02-01	21.7054	26.6075
1991.17	1991-03-01	22.0382	22.5334
1991.25	1991-04-01	23.631	21.7062
1991.33	1991-05-01	27.2971	23.0313
1991.42	1991-06-01	26.1322	23.504
1991.5	1991-07-01	26.8919	25.1408
1991.58	1991-08-01	25.6783	#N/A
1991.67	1991-09-01	27.0358	#N/A
1991.75	1991-10-01	22.8754	25.7209
1991.83	1991-11-01	22.5763	24.6631
1991.92	1991-12-01	21.9833	24.207
1992	1992-01-01	21.3025	21.4908
1992.08	1992-02-01	20.665	20.8568
1992.17	1992-03-01	21.0338	20.4613
1992.25	1992-04-01	23.1935	20.6472
1992.33	1992-05-01	26.7489	21.58
1992.42	1992-06-01	26.8488	21.7548
1992.5	1992-07-01	27.4509	22.3864
1992.58	1992-08-01	28.1318	23.5121
1992.67	1992-09-01	26.3998	24.6201
1992.75	1992-10-01	27.2171	24.9418
1992.83	1992-11-01	24.6886	23.2329
1992.92	1992-12-01	22.6736	23.1479
1993	1993-01-01	21.7444	23.5674
1993.08	1993-02-01	21.5556	20.9522
1993.17	1993-03-01	22.2585	20.0968
1993.25	1993-04-01	23.3774	18.8433
1993.33	1993-05-01	24.6332	20.3357
1993.42	1993-06-01	25.8062	20.8553
1993.5	1993-07-01	25.9494	22.0661
1993.58	1993-08-01	26.418	23.3481
1993.67	1993-09-01	26.578	23.5154
1993.75	1993-10-01	25.9077	24.5792
1993.83	1993-11-01	23.9881	23.3253
1993.92	1993-12-01	21.6242	22.8818
1994	1994-01-01	21.4772	23.155
1994.08	1994-02-01	20.9775	21.4034
1994.17	1994-03-01	22.1999	21.9201
1994.25	1994-04-01	22.67	20.2699
1994.33	1994-05-01	24.2681	20.555
1994.42	1994-06-01	26.3521	22.4669
1994.5	1994-07-01	26.8954	24.5628
1994.58	1994-08-01	26.7774	25.508
1994.67	1994-09-01	26.8989	25.5771
1994.75	1994-10-01	24.2971	26.6888
1994.83	1994-11-01	22.3575	24.0735
1994.92	1994-12-01	19.9847	23.691
1995	1995-01-01	19.5153	24.0386
1995.08	1995-02-01	18.1811	20.9267
1995.17	1995-03-01	21.6494	23.4788
1995.25	1995-04-01	21.2438	21.0214
1995.33	1995-05-01	21.9126	23.6268
1995.42	1995-06-01	21.1773	23.7519
1995.5	1995-07-01	23.1946	23.8548
1995.58	1995-08-01	25.7784	26.2121
1995.67	1995-09-01	25.9499	25.998
1995.75	1995-10-01	25.5729	25.2479
1995.83	1995-11-01	25.9051	26.7088
1995.92	1995-12-01	22.8716	25.0734
1996	1996-01-01	23.8884	25.344
1996.08	1996-02-01	21.5961	24.2042
1996.17	1996-03-01	24.4466	20.7257
1996.25	1996-04-01	22.3887	22.9534
1996.33	1996-05-01	21.8159	24.153
1996.42	1996-06-01	23.1628	24.7661
1996.5	1996-07-01	26.2826	24.9867
1996.58	1996-08-01	26.5882	24.9015
1996.67	1996-09-01	26.184	26.4393
1996.75	1996-10-01	23.0126	26.1709
1996.83	1996-11-01	22.4884	25.6608
1996.92	1996-12-01	22.6496	24.1908
1997	1997-01-01	22.4286	21.1709
1997.08	1997-02-01	22.3434	22.168
1997.17	1997-03-01	22.5192	22.6036
1997.25	1997-04-01	23.7049	21.9344
1997.33	1997-05-01	25.2138	23.6746
1997.42	1997-06-01	26.6187	23.8698
1997.5	1997-07-01	27.1836	24.7246
1997.58	1997-08-01	27.7633	#N/A
1997.67	1997-09-01	26.909	#N/A
1997.75	1997-10-01	26.751	24.0965
1997.83	1997-11-01	26.0996	24.5458
1997.92	1997-12-01	22.2115	24.1204
1998	1998-01-01	23.7432	22.6357
1998.08	1998-02-01	21.3668	22.538
1998.17	1998-03-01	21.6246	22.0392
1998.25	1998-04-01	21.9102	21.56
1998.33	1998-05-01	22.9066	20.4337
1998.42	1998-06-01	24.1223	#N/A
1998.5	1998-07-01	25.0213	24.8155
1998.58	1998-08-01	25.8069	24.9599
1998.67	1998-09-01	25.1718	24.8294
1998.75	1998-10-01	24.5508	24.9746
1998.83	1998-11-01	25.1729	24.3515
1998.92	1998-12-01	22.6888	23.2233
1999	1999-01-01	23.1232	23.384
1999.08	1999-02-01	22.0295	23.422
1999.17	1999-03-01	22.1795	22.4096
1999.25	1999-04-01	22.6246	21.3925
1999.33	1999-05-01	23.546	22.3655
1999.42	1999-06-01	24.9135	23.9093
1999.5	1999-07-01	26.2767	24.4991
1999.58	1999-08-01	27.0126	24.2113
1999.67	1999-09-01	26.2217	24.0754
1999.75	1999-10-01	24.6948	23.5537
1999.83	1999-11-01	24.268	22.9551
1999.92	1999-12-01	24.2948	21.9954
2000	2000-01-01	21.8461	22.5626
2000.08	2000-02-01	21.2414	21.7967
2000.17	2000-03-01	21.9309	21.2685
2000.25	2000-04-01	24.631	21.0217
2000.33	2000-05-01	24.6418	21.4912
2000.42	2000-06-01	24.8968	22.2811
2000.5	2000-07-01	25.6725	22.6638
2000.58	2000-08-01	26.5003	24.612
2000.67	2000-09-01	25.6443	25.0533
2000.75	2000-10-01	24.6742	25.4865
2000.83	2000-11-01	23.9761	24.6455
2000.92	2000-12-01	23.6159	25.2057
2001	2001-01-01	23.9146	23.6311
2001.08	2001-02-01	22.1862	23.7251
2001.17	2001-03-01	23.1978	22.8546
2001.25	2001-04-01	23.3229	24.5146
2001.33	2001-05-01	23.3732	23.9132
2001.42	2001-06-01	24.2407	25.0071
2001.5	2001-07-01	25.0497	25.1025
2001.58	2001-08-01	26.043	25.8103
2001.67	2001-09-01	25.5002	27.1283
2001.75	2001-10-01	25.6373	27.2619
2001.83	2001-11-01	23.4222	25.5377
2001.92	2001-12-01	26.485	24.4618
2002	2002-01-01	23.5133	24.4896
2002.08	2002-02-01	18.9694	23.4936
2002.17	2002-03-01	20.0839	22.6143
2002.25	2002-04-01	21.3177	23.3748
2002.33	2002-05-01	21.8924	23.3541
2002.42	2002-06-01	22.3263	25.1847
2002.5	2002-07-01	23.7393	24.1
2002.58	2002-08-01	25.7125	25.4495
2002.67	2002-09-01	25.9477	24.8413
2002.75	2002-10-01	24.4517	25.9662
2002.83	2002-11-01	26.4534	25.2036
2002.92	2002-12-01	25.9503	24.9972
2003	2003-01-01	23.5098	24.2768
2003.08	2003-02-01	21.3082	23.0511
2003.17	2003-03-01	22.0415	23.2404
2003.25	2003-04-01	21.9481	24.0919
2003.33	2003-05-01	25.0123	24.5676
2003.42	2003-06-01	26.2329	25.0175
2003.5	2003-07-01	25.9593	25.4262
2003.58	2003-08-01	26.7605	25.7558
2003.67	2003-09-01	26.1378	27.2743
2003.75	2003-10-01	25.6396	28.071
2003.83	2003-11-01	25.6661	27.3245
2003.92	2003-12-01	23.856	27.8512
2004	2004-01-01	23.415	27.4742
2004.08	2004-02-01	22.567	25.9076
2004.17	2004-03-01	23.7951	24.4465
2004.25	2004-04-01	25.6505	24.3717
2004.33	2004-05-01	26.4674	22.7955
2004.42	2004-06-01	25.1811	23.6253
2004.5	2004-07-01	26.727	26.8185
2004.58	2004-08-01	27.9909	27.5587
2004.67	2004-09-01	28.1648	27.8201
2004.75	2004-10-01	27.6823	27.3591
2004.83	2004-11-01	26.203	26.9329
2004.92	2004-12-01	23.8425	26.4315
2005	2005-01-01	23.9216	25.4971
2005.08	2005-02-01	23.0043	25.4462
2005.17	2005-03-01	23.5761	24.0704
2005.25	2005-04-01	26.7735	23.7195
2005.33	2005-05-01	27.2538	24.1981
2005.42	2005-06-01	26.9894	25.7561
2005.5	2005-07-01	26.7543	26.3466
2005.58	2005-08-01	27.6747	26.0699
2005.67	2005-09-01	24.9498	27.8813
2005.75	2005-10-01	25.7133	27.5377
2005.83	2005-11-01	23.1687	28.4462
2005.92	2005-12-01	23.1438	27.4232
2006	2006-01-01	23.7236	26.8835
2006.08	2006-02-01	22.2503	25.2149
2006.17	2006-03-01	23.6702	24.4414
2006.25	2006-04-01	24.0839	23.6341
2006.33	2006-05-01	22.4273	22.8226
2006.42	2006-06-01	22.1274	22.894
2006.5	2006-07-01	22.3999	25.2623
2006.58	2006-08-01	24.3397	26.3993
2006.67	2006-09-01	24.1295	27.2797
2006.75	2006-10-01	21.3579	27.4383
2006.83	2006-11-01	20.536	27.2238
2006.92	2006-12-01	20.549	26.9174
2007	2007-01-01	20.5048	25.4932
2007.08	2007-02-01	20.4495	23.5545
2007.17	2007-03-01	21.2403	22.791
2007.25	2007-04-01	21.333	23.9525
2007.33	2007-05-01	23.1539	24.931
2007.42	2007-06-01	24.3321	25.8099
2007.5	2007-07-01	25.1423	26.005
2007.58	2007-08-01	26.1164	26.0366
2007.67	2007-09-01	25.1318	27.1252
2007.75	2007-10-01	24.7185	26.8276
2007.83	2007-11-01	23.2615	27.4045
2007.92	2007-12-01	20.4832	27.3715
2008	2008-01-01	20.8132	25.2216
2008.08	2008-02-01	19.6224	23.196
2008.17	2008-03-01	21.5968	24.0171
2008.25	2008-04-01	22.7571	23.1734
2008.33	2008-05-01	20.5689	23.5924
2008.42	2008-06-01	21.9524	23.9869
2008.5	2008-07-01	27.2346	25.7992
2008.58	2008-08-01	27.6532	26.0661
2008.67	2008-09-01	26.2348	26.744
2008.75	2008-10-01	24.1071	26.4046
2008.83	2008-11-01	21.2054	25.9643
2008.92	2008-12-01	21.9224	25.106
2009	2009-01-01	20.6371	24.5025
2009.08	2009-02-01	19.8614	23.4059
2009.17	2009-03-01	21.301	22.051
2009.25	2009-04-01	22.8949	22.6889
2009.33	2009-05-01	24.4374	22.7026
2009.42	2009-06-01	24.9322	24.0435
2009.5	2009-07-01	25.041	26.0029
2009.58	2009-08-01	25.1535	26.2447
2009.67	2009-09-01	24.7626	27.0607
2009.75	2009-10-01	24.5126	27.5769
2009.83	2009-11-01	22.0227	26.2081
2009.92	2009-12-01	22.9583	25.707
2010	2010-01-01	22.2016	23.8931
2010.08	2010-02-01	21.8075	23.293
2010.17	2010-03-01	22.3387	23.1949
2010.25	2010-04-01	23.0895	23.2262
2010.33	2010-05-01	24.1023	23.7371
2010.42	2010-06-01	24.909	23.6267
2010.5	2010-07-01	25.5619	24.6067
2010.58	2010-08-01	25.9213	25.4321
2010.67	2010-09-01	25.8308	24.8615
2010.75	2010-10-01	23.8503	26.734
2010.83	2010-11-01	24.0929	25.0928
2010.92	2010-12-01	24.6369	24.9563
2011	2011-01-01	24.4408	25.1878
2011.08	2011-02-01	21.4034	24.1462
2011.17	2011-03-01	21.4645	23.0156
2011.25	2011-04-01	22.0935	22.4828
2011.33	2011-05-01	23.3759	24.1717
2011.42	2011-06-01	24.4643	25.1633
2011.5	2011-07-01	25.3895	26.3922
2011.58	2011-08-01	26.2043	26.0454
2011.67	2011-09-01	25.6283	26.0636
2011.75	2011-10-01	24.7344	27.1608
2011.83	2011-11-01	23.2302	26.0532
2011.92	2011-12-01	22.4768	25.8148
2012	2012-01-01	24.3602	23.3233
2012.08	2012-02-01	20.0308	22.9851
2012.17	2012-03-01	20.8744	21.8482
2012.25	2012-04-01	20.6429	21.8719
2012.33	2012-05-01	22.3775	23.4995
2012.42	2012-06-01	23.1736	24.0875
2012.5	2012-07-01	23.6167	25.2372
2012.58	2012-08-01	23.442	25.9367
2012.67	2012-09-01	22.5213	26.0925
2012.75	2012-10-01	20.7652	25.3424
2012.83	2012-11-01	21.0906	25.5409
2012.92	2012-12-01	21.0481	25.2634
2013	2013-01-01	20.2351	23.2879
2013.08	2013-02-01	18.3823	21.3884
2013.17	2013-03-01	19.2705	21.5187
2013.25	2013-04-01	20.5485	21.6509
2013.33	2013-05-01	20.2023	22.5564
2013.42	2013-06-01	21.3268	23.532
2013.5	2013-07-01	25.2789	23.6527
2013.58	2013-08-01	26.3355	24.2929
2013.67	2013-09-01	26.7602	25.1001
2013.75	2013-10-01	26.0801	25.439
2013.83	2013-11-01	24.4238	25.4443
2013.92	2013-12-01	22.7808	24.5328
2014	2014-01-01	22.0141	22.382
2014.08	2014-02-01	21.8019	21.4331
2014.17	2014-03-01	22.933	20.2073
2014.25	2014-04-01	23.7812	21.3692
2014.33	2014-05-01	23.0505	21.5801
2014.42	2014-06-01	25.397	22.3552
2014.5	2014-07-01	26.4699	23.2131
2014.58	2014-08-01	26.3845	#N/A
2014.67	2014-09-01	26.6275	#N/A
2014.75	2014-10-01	24.8311	#N/A
2014.83	2014-11-01	23.6459	23.9459
2014.92	2014-12-01	23.6999	24.6253
2015	2015-01-01	23.8116	22.3179
2015.08	2015-02-01	22.7725	#N/A
2015.17	2015-03-01	24.6167	#N/A
2015.25	2015-04-01	25.5851	#N/A
2015.33	2015-05-01	27.0648	#N/A
2015.42	2015-06-01	27.0604	#N/A
2015.5	2015-07-01	28.0146	#N/A
2015.58	2015-08-01	28.9046	#N/A
2015.67	2015-09-01	28.446	#N/A
2015.75	2015-10-01	26.1898	#N/A
2015.83	2015-11-01	25.7737	#N/A
2015.92	2015-12-01	24.2383	#N/A
2016	2016-01-01	24.8449	#N/A
2016.08	2016-02-01	22.9509	#N/A
2016.17	2016-03-01	24.3097	#N/A
2016.25	2016-04-01	24.5647	#N/A
2016.33	2016-05-01	26.9305	#N/A
2016.42	2016-06-01	27.284	#N/A
2016.5	2016-07-01	27.3716	#N/A
2016.58	2016-08-01	26.7953	#N/A
2016.67	2016-09-01	27.0097	#N/A
2016.75	2016-10-01	26.0899	#N/A
2016.83	2016-11-01	25.7108	24.2787
2016.92	2016-12-01	24.9921	24.9363
2017	2017-01-01	23.8604	23.877
2017.08	2017-02-01	23.1061	22.4111
2017.17	2017-03-01	23.9188	21.4347
2017.25	2017-04-01	25.1854	24.3559
2017.33	2017-05-01	26.5815	24.6075
2017.42	2017-06-01	26.9301	26.2734
2017.5	2017-07-01	26.9165	26.6507
2017.58	2017-08-01	27.1102	27.1978
2017.67	2017-09-01	27.1179	27.6966
2017.75	2017-10-01	27.0365	27.4301
2017.83	2017-11-01	25.3343	24.2872
2017.92	2017-12-01	24.9992	23.5675
2018	2018-01-01	23.8866	23.531
2018.08	2018-02-01	23.7371	22.944
2018.17	2018-03-01	23.2642	22.4268
2018.25	2018-04-01	23.4877	22.6224
2018.33	2018-05-01	23.8591	24.0919
2018.42	2018-06-01	26.0995	24.9384
2018.5	2018-07-01	27.1046	24.7705
2018.58	2018-08-01	27.2393	25.1489
2018.67	2018-09-01	27.5968	27.1801
2018.75	2018-10-01	27.3595	27.47
2018.83	2018-11-01	26.3947	27.2463
2018.92	2018-12-01	25.2964	25.5984
2019	2019-01-01	25.2544	23.4772
2019.08	2019-02-01	23.9213	23.1489
2019.17	2019-03-01	24.3905	21.4887
2019.25	2019-04-01	24.9053	24.1068
2019.33	2019-05-01	25.1368	26.5453
2019.42	2019-06-01	27.1465	28.5444
2019.5	2019-07-01	27.3523	28.9431
2019.58	2019-08-01	26.916	29.6224
2019.67	2019-09-01	26.5438	28.9129
