# Supplementary material for: Coral Thermometry Shows Exceptional 3˚C warming in the Subtropical North Pacific Over the Past Century
Source: Research Square preprint supplement (doi:10.21203/rs.3.rs-7414589/v1), 2025-10-12
Supplement: Supplementary file 2 [file 5a144b39ef383f0cb4e5101d.xlsx]

## Sheet: Data
Date	Makai Pier Sr/Ca (mmol/mol)	KoʻOlina Sr/Ca (mmol/mol)	Makai Pier SST (℃）	KoʻOlina SST (℃）	Type of outliers1	SEM checked diagenesis2	X-Ray checked transect quality3	Known historical events / other	5Removed (scenario A)	6Removed (scenario B)	7Removed (scenario C)		Makai Pier SST filtered (scenario A）	KoʻOlina SST filtered (scenario A)		Makai Pier SST filtered (scenario B)	KoʻOlina SST filtered (scenario B)		Makai Pier SST filtered (scenario C)	KoʻOlina SST filtered (scenario C)
1908-06-30	9.39112		19.6537										19.6537			19.6537			19.6537
1908-07-19	9.17563		23.1865										23.1865			23.1865			23.1865
1908-08-01	9.19157		22.9251										22.9251			22.9251			22.9251
1908-08-08	9.09607		24.4906										24.4906			24.4906			24.4906
1908-08-15	9.08756		24.6302										24.6302			24.6302			24.6302
1908-08-28	9.10004		24.4256										24.4256			24.4256			24.4256
1908-09-16	9.14687		23.6578										23.6578			23.6578			23.6578
1908-10-06	9.19576		22.8564										22.8564			22.8564			22.8564
1908-10-25	9.17962		23.121										23.121			23.121			23.121
1908-11-14	9.23518		22.2101										22.2101			22.2101			22.2101
1908-12-04	9.26028		21.7987										21.7987			21.7987			21.7987
1908-12-23	9.29342		21.2553										21.2553			21.2553			21.2553
1909-01-12	9.28444		21.4027										21.4027			21.4027			21.4027
1909-01-25	9.34839		20.3542										20.3542			20.3542			20.3542
1909-02-01	9.38689		19.7231										19.7231			19.7231			19.7231
1909-02-13	9.35701		20.213										20.213			20.213			20.213
1909-03-09	9.36123		20.1438										20.1438			20.1438			20.1438
1909-04-02	9.2434		22.0753										22.0753			22.0753			22.0753
1909-04-15	9.11026		24.258										24.258			24.258			24.258
1909-04-27	9.1087		24.2836										24.2836			24.2836			24.2836
1909-05-21	9.1507		23.5951										23.5951			23.5951			23.5951
1909-06-27	9.25915		21.8172										21.8172			21.8172			21.8172
1909-07-21	9.14535		23.6827										23.6827			23.6827			23.6827
1909-08-02	9.12198		24.066										24.066			24.066			24.066
1909-08-15	9.09943		24.4355										24.4355			24.4355			24.4355
1909-09-08	9.16872		23.2997										23.2997			23.2997			23.2997
1909-10-14	9.23142		22.2717										22.2717			22.2717			22.2717
1909-11-20	9.36018		20.1611										20.1611			20.1611			20.1611
1909-12-26	9.48333		18.1421										18.1421			18.1421			18.1421
1910-01-19	9.49585		17.9368										17.9368			17.9368			17.9368
1910-02-01	9.53592		17.2801				NA						17.2801			17.2801			17.2801
1910-02-22	9.46736		18.404				NA						18.404			18.404			18.404
1910-04-07	9.37807		19.8677				NA						19.8677			19.8677			19.8677
1910-06-11	9.28248		21.4347				NA						21.4347			21.4347			21.4347
1910-07-02	9.29737		21.1906				NA						21.1906			21.1906			21.1906
1910-08-15	9.25523		21.8815		d		dis-org			x	x		21.8815
1910-09-26	9.3579		20.1983				NA						20.1983			20.1983			20.1983
1910-11-08	9.29225		21.2746				NA						21.2746			21.2746			21.2746
1910-12-20	9.30703		21.0324				NA						21.0324			21.0324			21.0324
1911-02-01	9.53248		17.3364				NA						17.3364			17.3364			17.3364
1911-03-16	9.52099		17.5247										17.5247			17.5247			17.5247
1911-04-28	9.34699		20.3772										20.3772			20.3772			20.3772
1911-07-02	9.20728		22.6676										22.6676			22.6676			22.6676
1911-08-15	9.06657		24.9742										24.9742			24.9742			24.9742
1911-08-23	9.08857		24.6136										24.6136			24.6136			24.6136
1911-09-01	9.07302		24.8686										24.8686			24.8686			24.8686
1911-09-19	9.16026		23.4384										23.4384			23.4384			23.4384
1911-10-16	9.16448		23.3691										23.3691			23.3691			23.3691
1911-11-12	9.143		23.7212										23.7212			23.7212			23.7212
1911-12-09	9.2178		22.4951										22.4951			22.4951			22.4951
1912-01-05	9.24417		22.0627										22.0627			22.0627			22.0627
1912-01-23	9.34663		20.3831										20.3831			20.3831			20.3831
1912-02-01	9.40818		19.3741										19.3741			19.3741			19.3741
1912-02-11	9.23103		22.2783										22.2783			22.2783			22.2783
1912-03-02	9.35476		20.2498										20.2498			20.2498			20.2498
1912-04-02	9.27124		21.619										21.619			21.619			21.619
1912-05-03	9.22553		22.3683										22.3683			22.3683			22.3683
1912-06-03	9.19642		22.8456										22.8456			22.8456			22.8456
1912-07-04	9.26627		21.7005										21.7005			21.7005			21.7005
1912-07-25	9.20595		22.6894										22.6894			22.6894			22.6894
1912-08-04	9.15821		23.4719										23.4719			23.4719			23.4719
1912-08-15	9.12326		24.0448										24.0448			24.0448			24.0448
1912-09-21	9.19075		22.9386										22.9386			22.9386			22.9386
1912-11-17	9.21324		22.5699										22.5699			22.5699			22.5699
1912-12-25	9.2632		21.7509										21.7509			21.7509			21.7509
1913-01-13	9.30083		21.134										21.134			21.134			21.134
1913-02-01	9.34619		20.3903										20.3903			20.3903			20.3903
1913-03-16	9.27782		21.5111										21.5111			21.5111			21.5111
1913-05-20	9.15339		23.551										23.551			23.551			23.551
1913-07-02	9.0794		24.7639										24.7639			24.7639			24.7639
1913-07-24	9.05432		25.1751										25.1751			25.1751			25.1751
1913-08-15	9.0188		25.7573										25.7573			25.7573			25.7573
1913-09-01	9.07239		24.8789										24.8789			24.8789			24.8789
1913-09-28	9.13015		23.932										23.932			23.932			23.932
1913-10-25	9.11481		24.1834										24.1834			24.1834			24.1834
1913-11-21	9.10459		24.3509										24.3509			24.3509			24.3509
1913-12-18	9.274		21.5738										21.5738			21.5738			21.5738
1913-12-27	9.33417		20.5874										20.5874			20.5874			20.5874
1914-01-14	9.36727		20.0448										20.0448			20.0448			20.0448
1914-01-23	9.35782		20.1996										20.1996			20.1996			20.1996
1914-02-01	9.38167		19.8087										19.8087			19.8087			19.8087
1914-02-23	9.32091		20.8048										20.8048			20.8048			20.8048
1914-03-30	9.34556		20.4007										20.4007			20.4007			20.4007
1914-05-03	9.30833		21.0111										21.0111			21.0111			21.0111
1914-06-07	9.31587		20.8873										20.8873			20.8873			20.8873
1914-07-11	9.19454		22.8763										22.8763			22.8763			22.8763
1914-08-03	9.14536		23.6827										23.6827			23.6827			23.6827
1914-08-15	9.14367		23.7103										23.7103			23.7103			23.7103
1914-08-24	9.17876		23.1351										23.1351			23.1351			23.1351
1914-09-12	9.17942		23.1243										23.1243			23.1243			23.1243
1914-10-10	9.193		22.9016										22.9016			22.9016			22.9016
1914-11-08	9.19987		22.789										22.789			22.789			22.789
1914-12-06	9.32797		20.689										20.689			20.689			20.689
1915-01-03	9.31053		20.9749										20.9749			20.9749			20.9749
1915-01-22	9.36864		20.0223										20.0223			20.0223			20.0223
1915-02-01	9.40741		19.3867										19.3867			19.3867			19.3867
1915-02-17	9.37089		19.9853										19.9853			19.9853			19.9853
1915-03-21	9.22318		22.407										22.407			22.407			22.407
1915-05-09	9.14448		23.6971										23.6971			23.6971			23.6971
1915-06-27	9.16528		23.356										23.356			23.356			23.356
1915-07-29	9.14448		23.697										23.697			23.697			23.697
1915-08-15	9.13975		23.7746										23.7746			23.7746			23.7746
1915-09-02	9.20298		22.738										22.738			22.738			22.738
1915-10-10	9.20123		22.7667										22.7667			22.7667			22.7667
1915-12-06	9.33387		20.5923										20.5923			20.5923			20.5923
1916-01-13	9.37008		19.9987										19.9987			19.9987			19.9987
1916-02-01	9.39715		19.555										19.555			19.555			19.555
1916-02-16	9.36412		20.0965										20.0965			20.0965			20.0965
1916-03-17	9.3578		20.2001										20.2001			20.2001			20.2001
1916-05-01	9.27365		21.5794										21.5794			21.5794			21.5794
1916-06-15	9.15649		23.5002										23.5002			23.5002			23.5002
1916-07-15	9.15881		23.4622										23.4622			23.4622			23.4622
1916-07-30	9.1411		23.7525										23.7525			23.7525			23.7525
1916-08-15	9.13827		23.7988				NA						23.7988			23.7988			23.7988
1916-10-02	9.35096		20.3121										20.3121			20.3121			20.3121
1916-12-14	9.4076		19.3836										19.3836			19.3836			19.3836
1917-02-01	9.4761		18.2607				NA						18.2607			18.2607			18.2607
1917-03-11	9.41273		19.2995										19.2995			19.2995			19.2995
1917-04-06	9.3866		19.7279										19.7279			19.7279			19.7279
1917-05-28	9.32201		20.7868										20.7868			20.7868			20.7868
1917-07-19	9.35034		20.3222										20.3222			20.3222			20.3222
1917-08-15	9.29823		21.1766		d		dis-org			x	x		21.1766
1917-08-25	9.31824		20.8485				dis-org			x	x		20.8485
1917-09-15	9.36474		20.0863				dis-org			x	x		20.0863
1917-10-07	9.42546		19.0909				dis-org			x	x		19.0909
1917-10-17	9.46076		18.5121				dis-org			x	x		18.5121
1917-10-28	9.39962		19.5145				dis-org			x	x		19.5145
1917-11-08	9.42465		19.1042				dis-org			x	x		19.1042
1917-11-18	9.34362		20.4324				dis-org			x	x		20.4324
1917-11-29	9.36385		20.1008				dis-org			x	x		20.1008
1917-12-20	9.34098		20.4758				dis-org			x	x		20.4758
1918-01-10	9.40646		19.4023				dis-org			x	x		19.4023
1918-01-21	9.50509		17.7855				dis-org			x	x		17.7855
1918-02-01	9.52231		17.5032				dis-org			x	x		17.5032
1919-02-01	9.47702		18.2455				sub-op			x	x		18.2455
1919-02-28	9.37296		19.9515				sub-op			x	x		19.9515
1919-03-28	9.40809		19.3756				sub-op			x	x		19.3756
1919-04-25	9.40143		19.4848				sub-op			x	x		19.4848
1919-05-23	9.30731		21.0278				sub-op			x	x		21.0278
1919-06-20	9.23833		22.1585				sub-op			x	x		22.1585
1919-07-18	9.25708		21.8512				sub-op			x	x		21.8512
1919-08-15	9.23466		22.2187				sub-op			x	x		22.2187
1919-09-26	9.26964		21.6452				sub-op			x	x		21.6452
1919-11-08	9.27891		21.4933				sub-op			x	x		21.4933
1919-12-20	9.26975		21.6434				sub-op			x	x		21.6434
1920-02-01	9.36231		20.1261				sub-op			x	x		20.1261
1920-02-22	9.31451		20.9097				sub-op			x	x		20.9097
1920-03-15	9.28465		21.3991				sub-op			x	x		21.3991
1920-04-06	9.30246		21.1073				sub-op			x	x		21.1073
1920-04-28	9.22751		22.3359				sub-op			x	x		22.3359
1920-05-19	9.28658		21.3675				sub-op			x	x		21.3675
1920-06-10	9.22495		22.3779				sub-op			x	x		22.3779
1920-07-02	9.25194		21.9354				sub-op			x	x		21.9354
1920-07-24	9.24055		22.1221				sub-op			x	x		22.1221
1920-08-15	9.13287		23.8874				sub-op			x	x		23.8874
1921-02-01	9.31404		20.9173				sub-op			x	x		20.9173
1921-02-22	9.2904		21.3049				sub-op			x	x		21.3049
1921-03-16	9.26655		21.696				sub-op			x	x		21.696
1921-04-07	9.18599		23.0166				sub-op			x	x		23.0166
1921-04-28	9.20427		22.7169				sub-op			x	x		22.7169
1921-05-20	9.1692		23.2918				sub-op			x	x		23.2918
1921-06-11	9.14876		23.6268				sub-op			x	x		23.6268
1921-07-02	9.16437		23.3711				sub-op			x	x		23.3711
1921-07-24	9.1133		24.2082				sub-op			x	x		24.2082
1921-08-15	9.10958		24.2693				dis-org			x	x		24.2693
1921-09-02	9.13856		23.7941				dis-org			x	x		23.7941
1921-09-21	9.16231		23.4048				dis-org			x	x		23.4048
1921-10-10	9.24564		22.0387				dis-org			x	x		22.0387
1921-10-29	9.28486		21.3958				dis-org			x	x		21.3958
1921-11-17	9.26167		21.7759				dis-org			x	x		21.7759
1921-12-06	9.36341		20.108				dis-org			x	x		20.108
1921-12-25	9.47122		18.3407				dis-org			x	x		18.3407
1922-01-13	9.46959		18.3673				dis-org			x	x		18.3673
1922-02-01	9.51747		17.5825		b	SA	dis-org		x	x	x		17.5825
1922-02-28	9.43093		19.0012				NA						19.0012			19.0012			19.0012
1922-03-28	9.37312		19.9489				NA						19.9489			19.9489			19.9489
1922-04-25	9.41552		19.2538				NA						19.2538			19.2538			19.2538
1922-05-23	9.30297		21.0989				NA						21.0989			21.0989			21.0989
1922-06-20	9.27977		21.4792				NA						21.4792			21.4792			21.4792
1922-07-18	9.31506		20.9006				NA						20.9006			20.9006			20.9006
1922-08-15	9.24814		21.9977		d		NA						21.9977			21.9977			21.9977
1922-09-02	9.28793		21.3454										21.3454			21.3454			21.3454
1922-09-21	9.29705		21.196										21.196			21.196			21.196
1922-10-10	9.25056		21.9581										21.9581			21.9581			21.9581
1922-10-29	9.26513		21.7191										21.7191			21.7191			21.7191
1922-11-17	9.30115		21.1286										21.1286			21.1286			21.1286
1922-12-06	9.32881		20.6753										20.6753			20.6753			20.6753
1922-12-25	9.30665		21.0385										21.0385			21.0385			21.0385
1923-01-13	9.44151		18.8276										18.8276			18.8276			18.8276
1923-02-01	9.47832		18.2243										18.2243			18.2243			18.2243
1923-02-25	9.428		19.0492										19.0492			19.0492			19.0492
1923-03-21	9.34864		20.3501										20.3501			20.3501			20.3501
1923-04-15	9.36186		20.1334										20.1334			20.1334			20.1334
1923-05-09	9.26978		21.6429										21.6429			21.6429			21.6429
1923-06-02	9.15873		23.4634										23.4634			23.4634			23.4634
1923-06-27	9.14881		23.6261										23.6261			23.6261			23.6261
1923-07-21	9.17646		23.1728										23.1728			23.1728			23.1728
1923-08-15	9.12363		24.0388										24.0388			24.0388			24.0388
1923-09-01	9.14546		23.681										23.681			23.681			23.681
1923-09-18	9.19199		22.9182										22.9182			22.9182			22.9182
1923-10-05	9.14815		23.6368										23.6368			23.6368			23.6368
1923-10-22	9.31743		20.8618										20.8618			20.8618			20.8618
1923-11-08	9.30264		21.1042										21.1042			21.1042			21.1042
1923-11-25	9.31479		20.905										20.905			20.905			20.905
1923-12-12	9.32066		20.8088										20.8088			20.8088			20.8088
1923-12-29	9.34755		20.368										20.368			20.368			20.368
1924-01-15	9.3514		20.3049										20.3049			20.3049			20.3049
1924-02-01	9.36623		20.0618										20.0618			20.0618			20.0618
1924-04-06	9.20076		22.7744										22.7744			22.7744			22.7744
1924-06-10	9.15129		23.5854										23.5854			23.5854			23.5854
1924-08-15	9.14447		23.6973										23.6973			23.6973			23.6973
1924-09-26	9.14604		23.6715										23.6715			23.6715			23.6715
1924-11-08	9.18204		23.0813										23.0813			23.0813			23.0813
1924-12-20	9.25816		21.8334										21.8334			21.8334			21.8334
1925-02-01	9.40387		19.4447										19.4447			19.4447			19.4447
1925-03-21	9.38721		19.7178										19.7178			19.7178			19.7178
1925-05-09	9.39239		19.633										19.633			19.633			19.633
1925-06-27	9.35866		20.1859										20.1859			20.1859			20.1859
1925-08-15	9.18275		23.0697				dis-org			x	x		23.0697
1925-09-01	9.27499		21.5576				dis-org			x	x		21.5576
1925-09-18	9.3726		19.9573				dis-org			x	x		19.9573
1925-10-05	9.353		20.2786				dis-org			x	x		20.2786
1925-10-22	9.32476		20.7416				dis-org			x	x		20.7416
1925-11-08	9.45967		18.53				dis-org			x	x		18.53
1925-11-25	9.26504		21.7207				dis-org			x	x		21.7207
1925-12-12	9.40314		19.4567				dis-org			x	x		19.4567
1925-12-29	9.32771		20.6933				dis-org			x	x		20.6933
1926-01-15	9.39354		19.614				dis-org			x	x		19.614
1926-02-01	9.49469		17.956		b	NA	dis-org			x	x		17.956
1926-02-25	9.41342		19.2882										19.2882			19.2882			19.2882
1926-03-21	9.37164		19.9731										19.9731			19.9731			19.9731
1926-04-15	9.22805		22.327										22.327			22.327			22.327
1926-05-09	9.18583		23.0192										23.0192			23.0192			23.0192
1926-06-02	9.18271		23.0703										23.0703			23.0703			23.0703
1926-06-27	9.10592		24.3292										24.3292			24.3292			24.3292
1926-07-21	9.11679		24.151										24.151			24.151			24.151
1926-08-15	9.04057		25.4006										25.4006			25.4006			25.4006
1926-09-02	9.05092		25.2309										25.2309			25.2309			25.2309
1926-09-21	9.0444		25.3377										25.3377			25.3377			25.3377
1926-10-10	9.06722		24.9636										24.9636			24.9636			24.9636
1926-10-29	9.12262		24.0554										24.0554			24.0554			24.0554
1926-11-17	9.084		24.6885										24.6885			24.6885			24.6885
1926-12-06	9.14996		23.6073										23.6073			23.6073			23.6073
1926-12-25	9.25165		21.9402										21.9402			21.9402			21.9402
1927-01-13	9.20787		22.6579										22.6579			22.6579			22.6579
1927-02-01	9.30478		21.0691										21.0691			21.0691			21.0691
1927-02-28	9.1521		23.5721										23.5721			23.5721			23.5721
1927-03-28	9.15708		23.4905										23.4905			23.4905			23.4905
1927-04-25	9.20098		22.7708										22.7708			22.7708			22.7708
1927-05-23	9.12714		23.9814										23.9814			23.9814			23.9814
1927-06-20	9.16216		23.4073										23.4073			23.4073			23.4073
1927-07-18	9.1434		23.7147										23.7147			23.7147			23.7147
1927-08-15	9.11314		24.2109										24.2109			24.2109			24.2109
1927-09-18	9.16288		23.3954										23.3954			23.3954			23.3954
1927-10-22	9.13882		23.7899										23.7899			23.7899			23.7899
1927-11-25	9.11599		24.164										24.164			24.164			24.164
1927-12-29	9.23956		22.1384										22.1384			22.1384			22.1384
1928-02-01	9.29203		21.2783										21.2783			21.2783			21.2783
1928-02-25	9.27397		21.5743										21.5743			21.5743			21.5743
1928-03-21	9.27061		21.6293										21.6293			21.6293			21.6293
1928-04-14	9.25077		21.9546										21.9546			21.9546			21.9546
1928-05-09	9.23253		22.2537										22.2537			22.2537			22.2537
1928-06-02	9.10785		24.2976										24.2976			24.2976			24.2976
1928-06-27	9.12625		23.9958										23.9958			23.9958			23.9958
1928-07-21	9.03924		25.4222										25.4222			25.4222			25.4222
1928-08-15	9.03247		25.5332										25.5332			25.5332			25.5332
1928-08-28	9.05807		25.1136										25.1136			25.1136			25.1136
1928-09-10	9.13767		23.8086										23.8086			23.8086			23.8086
1928-09-23	9.18332		23.0604										23.0604			23.0604			23.0604
1928-10-06	9.21038		22.6167										22.6167			22.6167			22.6167
1928-10-19	9.26281		21.7572										21.7572			21.7572			21.7572
1928-11-01	9.22461		22.3834										22.3834			22.3834			22.3834
1928-11-14	9.24045		22.1237										22.1237			22.1237			22.1237
1928-11-27	9.19116		22.9319										22.9319			22.9319			22.9319
1928-12-10	9.29798		21.1806										21.1806			21.1806			21.1806
1928-12-23	9.19399		22.8853										22.8853			22.8853			22.8853
1929-01-05	9.26418		21.7347										21.7347			21.7347			21.7347
1929-01-18	9.21221		22.5868										22.5868			22.5868			22.5868
1929-02-01	9.31474		20.9059										20.9059			20.9059			20.9059
1929-02-22	9.22005		22.4582										22.4582			22.4582			22.4582
1929-03-16	9.18901		22.967										22.967			22.967			22.967
1929-04-07	9.10361		24.367										24.367			24.367			24.367
1929-04-28	9.13615		23.8336										23.8336			23.8336			23.8336
1929-05-20	9.03664		25.4649										25.4649			25.4649			25.4649
1929-06-11	9.02216		25.7023										25.7023			25.7023			25.7023
1929-07-02	9.0394		25.4196										25.4196			25.4196			25.4196
1929-07-24	8.98582		26.298										26.298			26.298			26.298
1929-08-15	8.9831		26.3426										26.3426			26.3426			26.3426
1929-08-28	9.03797		25.4431										25.4431			25.4431			25.4431
1929-09-10	9.08314		24.7026										24.7026			24.7026			24.7026
1929-09-23	9.0027		26.0212										26.0212			26.0212			26.0212
1929-10-06	9.03756		25.4498										25.4498			25.4498			25.4498
1929-10-19	9.04489		25.3297										25.3297			25.3297			25.3297
1929-11-01	9.12294		24.0501										24.0501			24.0501			24.0501
1929-11-14	9.11255		24.2204										24.2204			24.2204			24.2204
1929-11-27	9.15689		23.4935										23.4935			23.4935			23.4935
1929-12-10	9.16483		23.3634										23.3634			23.3634			23.3634
1929-12-23	9.28247		21.435										21.435			21.435			21.435
1930-01-05	9.25728		21.8478										21.8478			21.8478			21.8478
1930-01-18	9.38159		19.81										19.81			19.81			19.81
1930-02-01	9.40915		19.3582										19.3582			19.3582			19.3582
1930-02-25	9.39095		19.6565										19.6565			19.6565			19.6565
1930-03-21	9.40604		19.4092										19.4092			19.4092			19.4092
1930-04-15	9.2631		21.7524										21.7524			21.7524			21.7524
1930-05-09	9.28084		21.4617										21.4617			21.4617			21.4617
1930-06-02	9.20451		22.7129										22.7129			22.7129			22.7129
1930-06-27	9.1306		23.9246										23.9246			23.9246			23.9246
1930-07-21	9.07679		24.8068										24.8068			24.8068			24.8068
1930-08-15	9.06686		24.9696										24.9696			24.9696			24.9696
1930-09-08	9.1732		23.2263										23.2263			23.2263			23.2263
1930-10-02	9.12956		23.9416										23.9416			23.9416			23.9416
1930-10-26	9.12025		24.0942										24.0942			24.0942			24.0942
1930-11-20	9.14418		23.7019										23.7019			23.7019			23.7019
1930-12-14	9.24648		22.025										22.025			22.025			22.025
1931-01-07	9.3254		20.7311										20.7311			20.7311			20.7311
1931-02-01	9.48974		18.0371		b	NA	NA						18.0371			18.0371			18.0371
1931-02-28	9.36911		20.0145										20.0145			20.0145			20.0145
1931-03-28	9.29099		21.2952										21.2952			21.2952			21.2952
1931-04-25	9.22654		22.3518										22.3518			22.3518			22.3518
1931-05-23	9.20021		22.7834										22.7834			22.7834			22.7834
1931-06-20	9.17157		23.253										23.253			23.253			23.253
1931-07-18	9.22713		22.3421										22.3421			22.3421			22.3421
1931-08-15	9.1596		23.4492										23.4492			23.4492			23.4492
1931-09-18	9.23758		22.1709										22.1709			22.1709			22.1709
1931-10-22	9.30127		21.1267										21.1267			21.1267			21.1267
1931-11-25	9.36854		20.024										20.024			20.024			20.024
1931-12-29	9.45677		18.5775										18.5775			18.5775			18.5775
1932-02-01	9.49815		17.8992		b	NA	NA						17.8992			17.8992			17.8992
1932-03-11	9.3468		20.3803										20.3803			20.3803			20.3803
1932-04-19	9.30374		21.0863										21.0863			21.0863			21.0863
1932-05-28	9.1819		23.0835										23.0835			23.0835			23.0835
1932-07-06	9.19613		22.8503										22.8503			22.8503			22.8503
1932-08-15	9.17555		23.1877										23.1877			23.1877			23.1877
1932-09-18	9.23123		22.2749										22.2749			22.2749			22.2749
1932-10-22	9.35012		20.3259										20.3259			20.3259			20.3259
1932-11-25	9.54592		17.116		b	NA	dis-org	1933 cold seasonal min T / max T (ERSST)		x	x		17.116
1932-12-29	9.50625		17.7665		b	NA	dis-org	1933 cold seasonal min T / max T (ERSST)		x	x		17.7665
1933-02-01	9.59212		16.3587		b	NA	dis-org	1933 cold seasonal min T / max T (ERSST)		x	x		16.3587
1933-04-07	9.51857		17.5644		b	NA	dis-org	1933 cold seasonal min T / max T (ERSST)		x	x		17.5644
1933-06-11	9.4767		18.2508			NA	dis-org	1933 cold seasonal min T / max T (ERSST)		x	x		18.2508
1933-08-15	9.27176		21.6106		d	NA	dis-org	1933 cold seasonal min T / max T (ERSST)		x	x		21.6106
1933-09-18	9.3552		20.2426			NA	dis-org	1933 cold seasonal min T / max T (ERSST)		x	x		20.2426
1933-10-22	9.36007		20.1629			NA	dis-org	1933 cold seasonal min T / max T (ERSST)		x	x		20.1629
1933-11-25	9.44119		18.833			NA	dis-org	1933 cold seasonal min T / max T (ERSST)		x	x		18.833
1933-12-29	9.48992		18.0342		b	NA	dis-org	1933 cold seasonal min T / max T (ERSST)		x	x		18.0342
1934-02-01	9.4944		17.9606		b	NA	dis-org	1933 cold seasonal min T / max T (ERSST)		x	x		17.9606
1934-03-12	9.47541		18.272				dis-org			x	x		18.272
1934-04-20	9.45333		18.6339				dis-org			x	x		18.6339
1934-05-29	9.31732		20.8636				dis-org			x	x		20.8636
1934-07-07	9.15885		23.4615				dis-org			x	x		23.4615
1934-08-15	9.1089		24.2803				dis-org			x	x		24.2803
1934-08-28	9.13934		23.7813				dis-org			x	x		23.7813
1934-09-10	9.18598		23.0167				dis-org			x	x		23.0167
1934-09-23	9.22806		22.3269				dis-org			x	x		22.3269
1934-10-06	9.26564		21.7109				dis-org			x	x		21.7109
1934-10-19	9.28845		21.3369				dis-org			x	x		21.3369
1934-11-01	9.31594		20.8863				dis-org			x	x		20.8863
1934-11-14	9.32881		20.6753				dis-org			x	x		20.6753
1934-11-27	9.4299		19.0181				dis-org			x	x		19.0181
1934-12-10	9.39529		19.5855				dis-org			x	x		19.5855
1934-12-23	9.4936		17.9737		b	NA	dis-org, pores			x	x		17.9737
1935-01-05	9.50219		17.833		b	NA	dis-org, pores			x	x		17.833
1935-01-18	9.52635		17.4369		b	NA	dis-org, pores			x	x		17.4369
1935-02-01	9.57209		16.687		b	NA	dis-org, pores			x	x		16.687
1935-02-16	9.53247		17.3366		b	NA	dis-org, pores			x	x		17.3366
1935-03-03	9.4662		18.4229			NA	dis-org, pores			x	x		18.4229
1935-03-18	9.53027		17.3726		b	NA	dis-org, pores			x	x		17.3726
1935-04-02	9.50022		17.8652		b	NA	dis-org, pores			x	x		17.8652
1935-04-17	9.36563		20.0716				dis-org			x	x		20.0716
1935-05-02	9.40578		19.4134				dis-org			x	x		19.4134
1935-05-17	9.42638		19.0757				dis-org			x	x		19.0757
1935-06-01	9.40569		19.4148				dis-org			x	x		19.4148
1935-06-16	9.37472		19.9226				dis-org			x	x		19.9226
1935-07-01	9.39382		19.6095				dis-org			x	x		19.6095
1935-07-16	9.38124		19.8157				dis-org			x	x		19.8157
1935-07-31	9.30209		21.1133				dis-org			x	x		21.1133
1935-08-15	9.24825		21.9959		d		dis-org, pores			x	x		21.9959
1935-08-28	9.25503		21.8847				dis-org			x	x		21.8847
1935-09-10	9.30462		21.0718				dis-org			x	x		21.0718
1935-09-23	9.30907		20.9988				dis-org			x	x		20.9988
1935-10-06	9.27024		21.6355				dis-org			x	x		21.6355
1935-10-19	9.35513		20.2438				dis-org			x	x		20.2438
1935-11-01	9.26714		21.6863				dis-org			x	x		21.6863
1935-11-14	9.31549		20.8936				dis-org			x	x		20.8936
1935-11-27	9.29945		21.1565				dis-org			x	x		21.1565
1935-12-10	9.30876		21.0039				dis-org			x	x		21.0039
1935-12-23	9.35525		20.2417				dis-org			x	x		20.2417
1936-01-05	9.35207		20.294				dis-org			x	x		20.294
1936-01-18	9.40826		19.3729				dis-org			x	x		19.3729
1936-02-01	9.4192		19.1935				dis-org			x	x		19.1935
1936-03-04	9.38		19.836				dis-org			x	x		19.836
1936-04-06	9.39169		19.6445				dis-org			x	x		19.6445
1936-05-09	9.36341		20.108				dis-org			x	x		20.108
1936-06-10	9.2197		22.464				dis-org			x	x		22.464
1936-07-13	9.16352		23.3849				dis-org			x	x		23.3849
1936-08-15	9.04192		25.3783		g		dis-org			x	x		25.3783
1936-09-08	9.1181		24.1296				dis-org			x	x		24.1296
1936-10-02	9.04727		25.2907				dis-org			x	x		25.2907
1936-10-26	9.15082		23.593				dis-org			x	x		23.593
1936-11-20	9.34406		20.4253				dis-org			x	x		20.4253
1936-12-14	9.68964		14.7601		b	D, SA	dis-org		x	x	x
1937-01-07	9.71285		14.3796		b	D, SA	dis-org		x	x	x
1937-02-01	9.71619		14.3248		b, f, g	D, SA	dis-org		x	x	x
1937-02-11	9.68204		14.8845		b	D, SA	dis-org		x	x	x
1937-02-21	9.58903		16.4093		b	D, SA	dis-org		x	x	x
1937-03-03	9.41785		19.2155				dis-org			x	x		19.2155
1937-03-14	9.40548		19.4184				dis-org			x	x		19.4184
1937-03-24	9.36003		20.1634				dis-org			x	x		20.1634
1937-04-03	9.38181		19.8063				dis-org			x	x		19.8063
1937-04-13	9.25013		21.965				dis-org			x	x		21.965
1937-04-24	9.24356		22.0728				dis-org			x	x		22.0728
1937-05-04	9.21189		22.5919				dis-org			x	x		22.5919
1937-05-14	9.24035		22.1254				dis-org			x	x		22.1254
1937-05-24	9.23976		22.135				dis-org			x	x		22.135
1937-06-04	9.27656		21.5317				dis-org			x	x		21.5317
1937-06-14	9.31376		20.922				dis-org			x	x		20.922
1937-06-24	9.18518		23.0298				dis-org			x	x		23.0298
1937-07-04	9.21729		22.5034				dis-org			x	x		22.5034
1937-07-15	9.14187		23.7399				dis-org			x	x		23.7399
1937-07-25	9.15198		23.574				dis-org			x	x		23.574
1937-08-04	9.12937		23.9447				dis-org			x	x		23.9447
1937-08-15	9.06894		24.9355				dis-org			x	x		24.9355
1937-09-12	9.13045		23.927										23.927			23.927			23.927
1937-10-10	9.0991		24.4409										24.4409			24.4409			24.4409
1937-11-08	9.15017		23.6038										23.6038			23.6038			23.6038
1937-12-06	9.21433		22.5519										22.5519			22.5519			22.5519
1938-01-03	9.30025		21.1435										21.1435			21.1435			21.1435
1938-02-01	9.31153		20.9585										20.9585			20.9585			20.9585
1938-03-21	9.26707		21.6874										21.6874			21.6874			21.6874
1938-05-09	9.26007		21.8022										21.8022			21.8022			21.8022
1938-06-27	9.15926		23.4548										23.4548			23.4548			23.4548
1938-08-15	9.10303		24.3766										24.3766			24.3766			24.3766
1938-09-26	9.13018		23.9314										23.9314			23.9314			23.9314
1938-11-08	9.14993		23.6077										23.6077			23.6077			23.6077
1938-12-20	9.1037		24.3656										24.3656			24.3656			24.3656
1939-02-01	9.33082		20.6424										20.6424			20.6424			20.6424
1939-03-05	9.22522		22.3734										22.3734			22.3734			22.3734
1939-04-07	9.29501		21.2293										21.2293			21.2293			21.2293
1939-05-09	9.32459		20.7444										20.7444			20.7444			20.7444
1939-06-11	9.3184		20.846										20.846			20.846			20.846
1939-07-13	9.14612		23.6702										23.6702			23.6702			23.6702
1939-08-15	9.08563		24.6617										24.6617			24.6617			24.6617
1939-09-12	9.09002		24.5898										24.5898			24.5898			24.5898
1939-10-10	9.10643		24.3209										24.3209			24.3209			24.3209
1939-11-08	9.08575		24.6599										24.6599			24.6599			24.6599
1939-12-06	9.29192		21.2799										21.2799			21.2799			21.2799
1940-01-03	9.48747		18.0743										18.0743			18.0743			18.0743
1940-02-01	9.54122		17.1931		b, g	SA	dis-org	(1940 warm seasonal max T (HadISST))	x	x	x
1940-02-20	9.51367		17.6447		b	SA	dis-org	(1940 warm seasonal max T (HadISST))	x	x	x
1940-03-11	9.49036		18.0268		b	SA	dis-org	(1940 warm seasonal max T (HadISST))	x	x	x
1940-03-30	9.48302		18.1473				sub-op			x	x		18.1473
1940-04-19	9.35552		20.2373				sub-op			x	x		20.2373
1940-05-09	9.32249		20.7788				sub-op			x	x		20.7788
1940-05-28	9.28164		21.4485				sub-op			x	x		21.4485
1940-06-17	9.27765		21.514				sub-op			x	x		21.514
1940-07-06	9.05252		25.2045				sub-op			x	x		25.2045
1940-07-26	9.19228		22.9134				sub-op			x	x		22.9134
1940-08-15	8.95597		26.7874				sub-op			x	x		26.7874
1940-09-05	8.95775		26.7582				sub-op			x	x		26.7582
1940-09-26	9.01957		25.7448				sub-op			x	x		25.7448
1940-10-17	8.99777		26.1022				sub-op			x	x		26.1022
1940-11-08	8.98408		26.3265				sub-op			x	x		26.3265
1940-11-29	9.07032		24.9128										24.9128			24.9128			24.9128
1940-12-20	9.13386		23.8711										23.8711			23.8711			23.8711
1941-01-10	9.17814		23.1452										23.1452			23.1452			23.1452
1941-02-01	9.19584		22.8551										22.8551			22.8551			22.8551
1941-03-12	9.189		22.9672										22.9672			22.9672			22.9672
1941-04-20	9.06563		24.9896										24.9896			24.9896			24.9896
1941-05-29	9.05255		25.204										25.204			25.204			25.204
1941-07-07	9.06053		25.0733										25.0733			25.0733			25.0733
1941-08-15	8.98691		26.2802										26.2802			26.2802			26.2802
1941-09-08	9.11312		24.2111										24.2111			24.2111			24.2111
1941-10-02	9.0224		25.6984										25.6984			25.6984			25.6984
1941-10-26	9.04931		25.2572										25.2572			25.2572			25.2572
1941-11-20	9.23645		22.1893										22.1893			22.1893			22.1893
1941-12-14	9.34156		20.4662										20.4662			20.4662			20.4662
1942-01-07	9.30238		21.1085										21.1085			21.1085			21.1085
1942-02-01	9.37941		19.8458										19.8458			19.8458			19.8458
1942-02-16	9.29774		21.1846										21.1846			21.1846			21.1846
1942-03-03	9.22513		22.375										22.375			22.375			22.375
1942-03-18	9.20355		22.7288										22.7288			22.7288			22.7288
1942-04-02	9.21242		22.5834										22.5834			22.5834			22.5834
1942-04-17	9.2063		22.6836										22.6836			22.6836			22.6836
1942-05-02	9.18288		23.0676										23.0676			23.0676			23.0676
1942-05-17	9.19172		22.9227										22.9227			22.9227			22.9227
1942-06-01	9.1432		23.718										23.718			23.718			23.718
1942-06-16	9.11821		24.1277										24.1277			24.1277			24.1277
1942-07-01	9.03687		25.4612										25.4612			25.4612			25.4612
1942-07-16	9.04875		25.2664										25.2664			25.2664			25.2664
1942-07-31	9.09755		24.4664										24.4664			24.4664			24.4664
1942-08-15	9.01723		25.7832										25.7832			25.7832			25.7832
1942-09-08	9.17379		23.2165										23.2165			23.2165			23.2165
1942-10-02	9.19134		22.9289										22.9289			22.9289			22.9289
1942-10-26	9.20099		22.7707										22.7707			22.7707			22.7707
1942-11-20	9.19036		22.9449										22.9449			22.9449			22.9449
1942-12-14	9.16397		23.3776										23.3776			23.3776			23.3776
1943-01-07	9.12672		23.9881										23.9881			23.9881			23.9881
1943-02-01	9.22524		22.373										22.373			22.373			22.373
1943-04-07	9.16324		23.3895										23.3895			23.3895			23.3895
1943-06-11	9.05704		25.1305										25.1305			25.1305			25.1305
1943-08-15	8.98369		26.333		g		NA						26.333			26.333			26.333
1943-09-12	9.04937		25.2562										25.2562			25.2562			25.2562
1943-10-10	9.09592		24.4931										24.4931			24.4931			24.4931
1943-11-08	9.16285		23.3959										23.3959			23.3959			23.3959
1943-12-06	9.18557		23.0234										23.0234			23.0234			23.0234
1944-01-03	9.75642		13.6652		b	SA	dis-org	(1944 warm seasonal min T (HadISST))	x	x	x
1944-02-01	9.80538		12.8626		b, f, g	SA	dis-org	(1944 warm seasonal min T (HadISST))	x	x	x
1944-02-20	9.7791		13.2935		b	SA	dis-org	(1944 warm seasonal min T (HadISST))	x	x	x
1944-03-11	9.79434		13.0435		b	SA	dis-org	(1944 warm seasonal min T (HadISST))	x	x	x
1944-03-30	9.69775		14.627		b	SA	dis-org	(1944 warm seasonal min T (HadISST))	x	x	x
1944-04-19	9.61211		16.0309		b	SA	dis-org	(1944 warm seasonal min T (HadISST))	x	x	x
1944-05-09	9.52728		17.4217		b	SA	dis-org	(1944 warm seasonal min T (HadISST))	x	x	x
1944-05-28	9.4041		19.441				dis-org			x	x		19.441
1944-06-17	9.46944		18.3698				dis-org			x	x		18.3698
1944-07-06	9.24492		22.0505				dis-org			x	x		22.0505
1944-07-26	9.17639		23.1739				dis-org			x	x		23.1739
1944-08-15	9.16342		23.3866				dis-org			x	x		23.3866
1944-09-18	9.28451		21.4015				dis-org			x	x		21.4015
1944-10-22	9.25874		21.824				dis-org			x	x		21.824
1944-11-25	9.3127		20.9393				dis-org			x	x		20.9393
1944-12-29	9.32064		20.8092				dis-org			x	x		20.8092
1945-02-01	9.35865		20.1861				dis-org			x	x		20.1861
1945-03-05	9.29349		21.2542				dis-org			x	x		21.2542
1945-04-07	9.25811		21.8342				dis-org			x	x		21.8342
1945-05-09	9.1088		24.282				dis-org			x	x		24.282
1945-06-11	9.17126		23.258				dis-org			x	x		23.258
1945-07-13	9.25571		21.8736				dis-org			x	x		21.8736
1945-08-15	9.09814		24.4567				dis-org			x	x		24.4567
1945-11-08	9.39701		19.5571				dis-org			x	x		19.5571
1946-02-01	9.51618		17.6037		b	SA	dis-org		x	x	x
1946-03-12	9.35807		20.1956				dis-org			x	x		20.1956
1946-04-20	9.3019		21.1163				dis-org	Tsunami (1st Apr 1946)		x	x		21.1163
1946-05-29	9.17584		23.183				dis-org	Tsunami (1st Apr 1946)		x	x		23.183
1946-07-07	9.21049		22.615				dis-org	Tsunami (1st Apr 1946)		x	x		22.615
1946-08-15	9.15892		23.4603				dis-org	Tsunami (1st Apr 1946)		x	x		23.4603
1946-09-08	9.22454		22.3846				dis-org	Tsunami (1st Apr 1946)		x	x		22.3846
1946-10-02	9.38678		19.725				dis-org	Tsunami (1st Apr 1946)		x	x		19.725
1946-10-26	9.49549		17.9428		b	D, SA	dis-org	Tsunami (1st Apr 1946)	x	x	x
1946-11-20	9.47469		18.2837			D, SA	dis-org	Tsunami (1st Apr 1946)	x	x	x
1946-12-14	9.43144		18.9927			D, SA	dis-org	Tsunami (1st Apr 1946)	x	x	x
1947-01-07	9.56666		16.776		b	D, SA	dis-org	Tsunami (1st Apr 1946)	x	x	x
1947-02-01	9.66493		15.165		b, f	D, SA	dis-org	Tsunami (1st Apr 1946)	x	x	x
1947-03-05	9.58716		16.44		b	D, SA	dis-org	Tsunami (1st Apr 1946)	x	x	x
1947-04-07	9.48184		18.1665				dis-org	Tsunami (1st Apr 1946)		x	x		18.1665
1947-05-09	9.36576		20.0694				dis-org	Tsunami (1st Apr 1946)		x	x		20.0694
1947-06-11	9.28601		21.3769				dis-org	Tsunami (1st Apr 1946)		x	x		21.3769
1947-07-13	9.37597		19.9022				dis-org	Tsunami (1st Apr 1946)		x	x		19.9022
1947-08-15	9.27457		21.5644		d, g		dis-org	Tsunami (1st Apr 1946)		x	x		21.5644
1947-09-05	9.31162		20.957				dis-org	Tsunami (1st Apr 1946)		x	x		20.957
1947-09-26	9.33345		20.5991				dis-org	Tsunami (1st Apr 1946)		x	x		20.5991
1947-10-17	9.61012		16.0636		b	D, SA	dis-org	Tsunami (1st Apr 1946), 1948 cold seasonal min T (ERSST)	x	x	x
1947-11-08	9.74289		13.887		b	D, SA	dis-org	Tsunami (1st Apr 1946), 1948 cold seasonal min T (ERSST)	x	x	x
1947-11-29	9.68667		14.8088		b	D, SA	dis-org	Tsunami (1st Apr 1946), 1948 cold seasonal min T (ERSST)	x	x	x
1947-12-20	9.8603		11.9623		b	D, SA	dis-org	Tsunami (1st Apr 1946), 1948 cold seasonal min T (ERSST)	x	x	x
1948-01-10	8.98908		26.2445			D, SA	dis-org	Tsunami (1st Apr 1946), 1948 cold seasonal min T (ERSST)	x	x	x
1948-02-01	9.9078		11.1836		b, f, g	D, SA	dis-org	Tsunami (1st Apr 1946), 1948 cold seasonal min T (ERSST)	x	x	x
1948-02-22	9.54921		17.0622		b	D, SA	dis-org	Tsunami (1st Apr 1946), 1948 cold seasonal min T (ERSST)	x	x	x
1948-03-15	9.80273		12.906		b	D, SA	dis-org	Tsunami (1st Apr 1946), 1948 cold seasonal min T (ERSST)	x	x	x
1948-04-06	9.70714		14.4732		b	D, SA	dis-org	Tsunami (1st Apr 1946), 1948 cold seasonal min T (ERSST)	x	x	x
1948-04-28	9.57197		16.689		b	D, SA	dis-org	Tsunami (1st Apr 1946), 1948 cold seasonal min T (ERSST)	x	x	x
1948-05-19	9.42502		19.0981				dis-org			x	x		19.0981
1948-06-10	9.31616		20.8826				dis-org			x	x		20.8826
1948-07-02	9.25577		21.8727				dis-org			x	x		21.8727
1948-07-24	9.24789		22.0018				dis-org			x	x		22.0018
1948-08-15	9.1914		22.9279				dis-org			x	x		22.9279
1948-09-18	9.30417		21.0792				dis-org			x	x		21.0792
1948-10-22	9.31958		20.8266				dis-org			x	x		20.8266
1948-11-25	9.31818		20.8494				dis-org			x	x		20.8494
1948-12-29	9.35422		20.2588				dis-org			x	x		20.2588
1949-02-01	9.44295		18.8041										18.8041			18.8041			18.8041
1949-02-16	9.40689		19.3952										19.3952			19.3952			19.3952
1949-03-03	9.3504		20.3214										20.3214			20.3214			20.3214
1949-03-18	9.29481		21.2327										21.2327			21.2327			21.2327
1949-04-02	9.31477		20.9053										20.9053			20.9053			20.9053
1949-04-17	9.40296		19.4596										19.4596			19.4596			19.4596
1949-05-02	9.41119		19.3248										19.3248			19.3248			19.3248
1949-05-17	9.36514		20.0797										20.0797			20.0797			20.0797
1949-06-01	9.29178		21.2823										21.2823			21.2823			21.2823
1949-06-16	9.31986		20.822										20.822			20.822			20.822
1949-07-01	9.09189		24.5592										24.5592			24.5592			24.5592
1949-07-16	9.04214		25.3747										25.3747			25.3747			25.3747
1949-07-31	9.02985		25.5762										25.5762			25.5762			25.5762
1949-08-15	9.01872		25.7587										25.7587			25.7587			25.7587
1949-09-12	9.09339		24.5345										24.5345			24.5345			24.5345
1949-10-10	9.09375		24.5287										24.5287			24.5287			24.5287
1949-11-08	9.18218		23.079										23.079			23.079			23.079
1949-12-06	9.23267		22.2513										22.2513			22.2513			22.2513
1950-01-03	9.26277		21.7578										21.7578			21.7578			21.7578
1950-02-01	9.32867		20.6775										20.6775			20.6775			20.6775
1950-02-22	9.25395		21.9024										21.9024			21.9024			21.9024
1950-03-16	9.16879		23.2985										23.2985			23.2985			23.2985
1950-04-07	9.13686		23.8219										23.8219			23.8219			23.8219
1950-04-28	9.16825		23.3073										23.3073			23.3073			23.3073
1950-05-20	9.0874		24.6327										24.6327			24.6327			24.6327
1950-06-11	9.13148		23.9102										23.9102			23.9102			23.9102
1950-07-02	9.18545		23.0255										23.0255			23.0255			23.0255
1950-07-24	9.0349		25.4935										25.4935			25.4935			25.4935
1950-08-15	9.01654		25.7944										25.7944			25.7944			25.7944
1950-09-08	9.0788		24.7737										24.7737			24.7737			24.7737
1950-10-02	9.06024		25.0781										25.0781			25.0781			25.0781
1950-10-26	9.06486		25.0023										25.0023			25.0023			25.0023
1950-11-20	9.16826		23.3073										23.3073			23.3073			23.3073
1950-12-14	9.24501		22.0491										22.0491			22.0491			22.0491
1951-01-07	9.32085		20.8058										20.8058			20.8058			20.8058
1951-02-01	9.32866		20.6778										20.6778			20.6778			20.6778
1951-02-17	9.32842		20.6816										20.6816			20.6816			20.6816
1951-03-05	9.32103		20.8027										20.8027			20.8027			20.8027
1951-03-21	9.29193		21.2798										21.2798			21.2798			21.2798
1951-04-07	9.31271		20.9392										20.9392			20.9392			20.9392
1951-04-23	9.246		22.0328										22.0328			22.0328			22.0328
1951-05-09	9.21471		22.5458										22.5458			22.5458			22.5458
1951-05-25	9.1725		23.2376										23.2376			23.2376			23.2376
1951-06-11	9.12352		24.0406										24.0406			24.0406			24.0406
1951-06-27	9.12696		23.9843										23.9843			23.9843			23.9843
1951-07-13	9.03028		25.5692										25.5692			25.5692			25.5692
1951-07-29	9.05653		25.1389										25.1389			25.1389			25.1389
1951-08-15	9.02629		25.6345		g		NA						25.6345			25.6345			25.6345
1951-09-05	9.08479		24.6756										24.6756			24.6756			24.6756
1951-09-26	9.14642		23.6653										23.6653			23.6653			23.6653
1951-10-17	9.13948		23.779										23.779			23.779			23.779
1951-11-08	9.22576		22.3645										22.3645			22.3645			22.3645
1951-11-29	9.19434		22.8798										22.8798			22.8798			22.8798
1951-12-20	9.2932		21.259										21.259			21.259			21.259
1952-01-10	9.39035		19.6663										19.6663			19.6663			19.6663
1952-02-01	9.58938		16.4036		b	NA	NA						16.4036			16.4036			16.4036
1952-02-17	9.47986		18.1989										18.1989			18.1989			18.1989
1952-03-04	9.37257		19.9578										19.9578			19.9578			19.9578
1952-03-21	9.38655		19.7286										19.7286			19.7286			19.7286
1952-04-06	9.3945		19.5984										19.5984			19.5984			19.5984
1952-04-22	9.28941		21.3211										21.3211			21.3211			21.3211
1952-05-09	9.20405		22.7205										22.7205			22.7205			22.7205
1952-05-25	9.25556		21.8761										21.8761			21.8761			21.8761
1952-06-10	9.24912		21.9817										21.9817			21.9817			21.9817
1952-06-27	9.28175		21.4467										21.4467			21.4467			21.4467
1952-07-13	9.21299		22.5739										22.5739			22.5739			22.5739
1952-07-29	9.18608		23.0151										23.0151			23.0151			23.0151
1952-08-15	9.1572		23.4886										23.4886			23.4886			23.4886
1952-09-18	9.26171		21.7752										21.7752			21.7752			21.7752
1952-10-22	9.3118		20.9541										20.9541			20.9541			20.9541
1952-11-25	9.37396		19.9351										19.9351			19.9351			19.9351
1952-12-29	9.36293		20.1159										20.1159			20.1159			20.1159
1953-02-01	9.42935		19.027										19.027			19.027			19.027
1953-03-05	9.42453		19.1061										19.1061			19.1061			19.1061
1953-04-07	9.38432		19.7653										19.7653			19.7653			19.7653
1953-05-09	9.2934		21.2557										21.2557			21.2557			21.2557
1953-06-11	9.26903		21.6552										21.6552			21.6552			21.6552
1953-07-13	9.15248		23.566										23.566			23.566			23.566
1953-08-15	9.05322		25.1932										25.1932			25.1932			25.1932
1953-09-18	9.08545		24.6648										24.6648			24.6648			24.6648
1953-10-22	9.09301		24.5408										24.5408			24.5408			24.5408
1953-11-25	9.25735		21.8467										21.8467			21.8467			21.8467
1953-12-29	9.32083		20.806										20.806			20.806			20.806
1954-02-01	9.37009		19.9986										19.9986			19.9986			19.9986
1954-02-28	9.26031		21.7982										21.7982			21.7982			21.7982
1954-03-28	9.26452		21.7293										21.7293			21.7293			21.7293
1954-04-25	9.28769		21.3494										21.3494			21.3494			21.3494
1954-05-23	9.27314		21.5879										21.5879			21.5879			21.5879
1954-06-20	9.09286		24.5433										24.5433			24.5433			24.5433
1954-07-18	9.09694		24.4764										24.4764			24.4764			24.4764
1954-08-15	9.0527		25.2016										25.2016			25.2016			25.2016
1954-09-05	9.12931		23.9458										23.9458			23.9458			23.9458
1954-09-26	9.15971		23.4474										23.4474			23.4474			23.4474
1954-10-17	9.16822		23.3078										23.3078			23.3078			23.3078
1954-11-08	9.29079		21.2986										21.2986			21.2986			21.2986
1954-11-29	9.22047		22.4514										22.4514			22.4514			22.4514
1954-12-20	9.45831		18.5523										18.5523			18.5523			18.5523
1955-01-10	9.36749		20.0412										20.0412			20.0412			20.0412
1955-02-01	9.49332		17.9784		b	NA	NA						17.9784			17.9784			17.9784
1955-02-18	9.49113		18.0142		b	NA	NA						18.0142			18.0142			18.0142
1955-03-08	9.38215		19.8008										19.8008			19.8008			19.8008
1955-03-26	9.26439		21.7313										21.7313			21.7313			21.7313
1955-04-12	9.34459		20.4166										20.4166			20.4166			20.4166
1955-04-30	9.20885		22.6418										22.6418			22.6418			22.6418
1955-05-18	9.11704		24.1469										24.1469			24.1469			24.1469
1955-06-05	9.09484		24.5108										24.5108			24.5108			24.5108
1955-06-22	9.06627		24.9792										24.9792			24.9792			24.9792
1955-07-10	9.02519		25.6526										25.6526			25.6526			25.6526
1955-07-28	9.04196		25.3776										25.3776			25.3776			25.3776
1955-08-15	9.01752		25.7783										25.7783			25.7783			25.7783
1955-09-05	9.04368		25.3495										25.3495			25.3495			25.3495
1955-09-26	9.07691		24.8048										24.8048			24.8048			24.8048
1955-10-17	9.12671		23.9883										23.9883			23.9883			23.9883
1955-11-08	9.12127		24.0776										24.0776			24.0776			24.0776
1955-11-29	9.16896		23.2957										23.2957			23.2957			23.2957
1955-12-20	9.25466		21.8908										21.8908			21.8908			21.8908
1956-01-10	9.24231		22.0934										22.0934			22.0934			22.0934
1956-02-01	9.30707		21.0316										21.0316			21.0316			21.0316
1956-03-04	9.26892		21.6571										21.6571			21.6571			21.6571
1956-04-06	9.16685		23.3303										23.3303			23.3303			23.3303
1956-05-09	9.25138		21.9445										21.9445			21.9445			21.9445
1956-06-10	8.99864		26.0878										26.0878			26.0878			26.0878
1956-07-13	9.00362		26.0062										26.0062			26.0062			26.0062
1956-08-15	8.95721		26.7671										26.7671			26.7671			26.7671
1956-08-29	9.0656		24.9901										24.9901			24.9901			24.9901
1956-09-12	8.9586		26.7443										26.7443			26.7443			26.7443
1956-09-26	9.0785		24.7788										24.7788			24.7788			24.7788
1956-10-10	9.03034		25.5681										25.5681			25.5681			25.5681
1956-10-24	9.00707		25.9497										25.9497			25.9497			25.9497
1956-11-08	9.12981		23.9376										23.9376			23.9376			23.9376
1956-11-22	9.1711		23.2607										23.2607			23.2607			23.2607
1956-12-06	9.28873		21.3323										21.3323			21.3323			21.3323
1956-12-20	9.3481		20.359										20.359			20.359			20.359
1957-01-03	9.34643		20.3863										20.3863			20.3863			20.3863
1957-01-09		9.34239		20.1409			sub-op			x	x			20.1409			20.1409
1957-01-17	9.40282		19.462										19.462						19.462
1957-01-21		9.40013		19.0716	b		sub-op			x	x			19.0716			19.0716
1957-02-01	9.41818		19.2102										19.2102						19.2102
1957-02-02		9.29692		20.983			sub-op			x	x			20.983			20.983
1957-02-13		9.27876		21.3193			sub-op			x	x			21.3193			21.3193
1957-02-25		9.2873		21.1612			sub-op			x	x			21.1612			21.1612
1957-02-28	9.30503		21.0651										21.0651						21.0651
1957-03-09		9.41896		18.723	b		sub-op			x	x			18.723			18.723
1957-03-20		9.30024		20.9215										20.9215			20.9215			20.9215
1957-03-28	9.25784		21.8387										21.8387			21.8387			21.8387
1957-04-01		9.17463		23.2475										23.2475			23.2475			23.2475
1957-04-12		9.30087		20.9099										20.9099			20.9099			20.9099
1957-04-24		9.25428		21.7726										21.7726			21.7726			21.7726
1957-04-25	9.12344		24.0419										24.0419			24.0419			24.0419
1957-05-06		9.24433		21.9568										21.9568			21.9568			21.9568				#DIV/0!
1957-05-17		9.18803		22.9995										22.9995			22.9995			22.9995				0
1957-05-23	9.08872		24.6112										24.6112			24.6112			24.6112					0
1957-05-29		9.20823		22.6253										22.6253			22.6253			22.6253				#DIV/0!
1957-06-10		9.25629		21.7354										21.7354			21.7354			21.7354
1957-06-20	9.03891		25.4278										25.4278			25.4278			25.4278
1957-06-21		9.23558		22.1188										22.1188			22.1188			22.1188
1957-07-03		9.21097		22.5746										22.5746			22.5746			22.5746
1957-07-15		9.08897		24.8339										24.8339			24.8339			24.8339
1957-07-18	9.03302		25.5243										25.5243			25.5243			25.5243
1957-07-26		9.14892		23.7237										23.7237			23.7237			23.7237
1957-08-07		9.17698		23.2041										23.2041			23.2041			23.2041
1957-08-15	8.95755		26.7615										26.7615			26.7615			26.7615
1957-08-19		9.12664		24.1363										24.1363			24.1363			24.1363
1957-08-30		9.13652		23.9533										23.9533			23.9533			23.9533
1957-09-11		9.07303		25.1291										25.1291			25.1291			25.1291
1957-09-18	9.07624		24.8157										24.8157			24.8157			24.8157
1957-09-23		9.03272		25.8755										25.8755			25.8755			25.8755
1957-10-01		9.05936		25.3823										25.3823			25.3823			25.3823
1957-10-10		9.20301		22.7221										22.7221			22.7221			22.7221
1957-10-19		9.12279		24.2076										24.2076			24.2076			24.2076
1957-10-22	9.07226		24.881										24.881			24.881			24.881
1957-10-28		9.13303		24.0179										24.0179			24.0179			24.0179
1957-11-05		9.10363		24.5624										24.5624			24.5624			24.5624
1957-11-14		9.0406		25.7297										25.7297			25.7297			25.7297
1957-11-23		9.03886		25.7618										25.7618			25.7618			25.7618
1957-11-25	9.14331		23.7162										23.7162			23.7162			23.7162
1957-12-02		9.11805		24.2954										24.2954			24.2954			24.2954
1957-12-11		9.17426		23.2544										23.2544			23.2544			23.2544
1957-12-19		9.18678		23.0226										23.0226			23.0226			23.0226
1957-12-28		9.23345		22.1584										22.1584			22.1584			22.1584
1957-12-29	9.27662		21.5308										21.5308			21.5308			21.5308
1958-01-06		9.13752		23.9348										23.9348			23.9348			23.9348
1958-01-15		9.24015		22.0342										22.0342			22.0342			22.0342
1958-01-24		9.10979		24.4484										24.4484			24.4484			24.4484
1958-02-01	9.29947		21.1563										21.1563			21.1563			21.1563
1958-02-01		9.22774		22.2641										22.2641			22.2641			22.2641
1958-02-10		9.25819		21.7002										21.7002			21.7002			21.7002
1958-02-19		9.27645		21.362										21.362			21.362			21.362
1958-02-28		9.25698		21.7227										21.7227			21.7227			21.7227
1958-03-09		9.34796		20.0377										20.0377			20.0377			20.0377
1958-03-12	9.29127		21.2906										21.2906			21.2906			21.2906
1958-03-19		9.18898		22.9819										22.9819			22.9819			22.9819
1958-03-29		9.23473		22.1346										22.1346			22.1346			22.1346
1958-04-09		9.24763		21.8958										21.8958			21.8958			21.8958
1958-04-19		9.25716		21.7192										21.7192			21.7192			21.7192
1958-04-20	9.27351		21.5819										21.5819			21.5819			21.5819
1958-04-30		9.17442		23.2515										23.2515			23.2515			23.2515
1958-05-10		9.12035		24.2527										24.2527			24.2527			24.2527											1955-01-01	20090
1958-05-20		9.21917		22.4227										22.4227			22.4227			22.4227											2019-12-31	43830
1958-05-29	9.2797		21.4804										21.4804			21.4804			21.4804
1958-05-31		9.18289		23.0946										23.0946			23.0946			23.0946
1958-06-10		9.28002		21.2959										21.2959			21.2959			21.2959
1958-06-21		9.18476		23.06										23.06			23.06			23.06
1958-07-01		9.174		23.2592										23.2592			23.2592			23.2592
1958-07-07	9.22488		22.379										22.379			22.379			22.379
1958-07-12		9.18247		23.1023										23.1023			23.1023			23.1023
1958-07-22		9.1337		24.0055										24.0055			24.0055			24.0055
1958-08-01		9.11737		24.3081										24.3081			24.3081			24.3081
1958-08-12		9.10317		24.5709										24.5709			24.5709			24.5709
1958-08-15	9.00082		26.0521										26.0521			26.0521			26.0521
1958-08-22		9.06045		25.362										25.362			25.362			25.362
1958-08-29	9.02173		25.7094										25.7094			25.7094			25.7094
1958-09-02		9.14578		23.7818										23.7818			23.7818			23.7818
1958-09-12	9.04483		25.3307										25.3307			25.3307			25.3307
1958-09-12		9.08529		24.902										24.902			24.902			24.902
1958-09-23		9.00513		26.3865										26.3865			26.3865			26.3865
1958-09-26	9.02833		25.6012										25.6012			25.6012			25.6012
1958-09-28		9.10118		24.6078										24.6078			24.6078			24.6078
1958-10-03		9.13824		23.9215										23.9215			23.9215			23.9215
1958-10-08		9.10581		24.522										24.522			24.522			24.522
1958-10-10	9.03903		25.4258										25.4258			25.4258			25.4258
1958-10-13		9.0085		26.3242										26.3242			26.3242			26.3242
1958-10-19		9.10538		24.53										24.53			24.53			24.53
1958-10-24	9.04252		25.3685										25.3685			25.3685			25.3685
1958-10-24		9.11358		24.3781										24.3781			24.3781			24.3781
1958-10-29		9.0938		24.7445										24.7445			24.7445			24.7445
1958-11-03		9.16378		23.4486										23.4486			23.4486			23.4486
1958-11-08	9.08894		24.6076										24.6076			24.6076			24.6076
1958-11-09		9.08456		24.9156										24.9156			24.9156			24.9156
1958-11-14		9.10058		24.6189										24.6189			24.6189			24.6189
1958-11-19		9.1576		23.5629										23.5629			23.5629			23.5629
1958-11-22	9.07527		24.8316										24.8316			24.8316			24.8316
1958-11-24		9.16351		23.4535										23.4535			23.4535			23.4535
1958-11-29		9.07493		25.0939										25.0939			25.0939			25.0939
1958-12-05		9.10432		24.5496										24.5496			24.5496			24.5496
1958-12-06	9.17058		23.2691										23.2691			23.2691			23.2691
1958-12-10		9.10959		24.452										24.452			24.452			24.452
1958-12-15		9.08338		24.9374										24.9374			24.9374			24.9374
1958-12-20	9.20725		22.668										22.668			22.668			22.668
1958-12-20		9.11022		24.4403										24.4403			24.4403			24.4403
1958-12-25		9.19434		22.8826										22.8826			22.8826			22.8826
1958-12-31		9.14792		23.7422										23.7422			23.7422			23.7422
1959-01-03	9.22387		22.3956										22.3956			22.3956			22.3956
1959-01-05		9.16122		23.496										23.496			23.496			23.496
1959-01-10		9.07939		25.0113										25.0113			25.0113			25.0113
1959-01-15		9.17812		23.183										23.183			23.183			23.183
1959-01-17	9.18002		23.1144										23.1144			23.1144			23.1144
1959-01-21		9.10884		24.4659										24.4659			24.4659			24.4659
1959-01-26		9.14037		23.882										23.882			23.882			23.882
1959-01-31		9.17568		23.2282										23.2282			23.2282			23.2282
1959-02-01	9.22293		22.411				NA	(1959 warm seasonal max T (HadISST/ERSST))					22.411			22.411			22.411
1959-02-05		9.23343		22.1587				(1959 warm seasonal max T (HadISST/ERSST))						22.1587			22.1587			22.1587
1959-02-10		9.22986		22.2249				(1959 warm seasonal max T (HadISST/ERSST))						22.2249			22.2249			22.2249
1959-02-16		9.23754		22.0827				(1959 warm seasonal max T (HadISST/ERSST))						22.0827			22.0827			22.0827
1959-02-21		9.33044		20.3623				(1959 warm seasonal max T (HadISST/ERSST))						20.3623			20.3623			20.3623
1959-02-25	9.1583		23.4706				NA	(1959 warm seasonal max T (HadISST/ERSST))					23.4706			23.4706			23.4706
1959-02-26		9.31623		20.6254				(1959 warm seasonal max T (HadISST/ERSST))						20.6254			20.6254			20.6254
1959-03-03		9.32621		20.4406				(1959 warm seasonal max T (HadISST/ERSST))						20.4406			20.4406			20.4406
1959-03-09		9.37116		19.6082	b		NA	(1959 warm seasonal max T (HadISST/ERSST))						19.6082			19.6082			19.6082
1959-03-19		9.36923		19.6438				(1959 warm seasonal max T (HadISST/ERSST))						19.6438			19.6438			19.6438
1959-03-21	9.16962		23.285				NA	(1959 warm seasonal max T (HadISST/ERSST))					23.285			23.285			23.285
1959-03-29		9.32255		20.5083				(1959 warm seasonal max T (HadISST/ERSST))						20.5083			20.5083			20.5083
1959-04-09		9.32996		20.3711				(1959 warm seasonal max T (HadISST/ERSST))						20.3711			20.3711			20.3711
1959-04-15	9.19388		22.8872				NA	(1959 warm seasonal max T (HadISST/ERSST))					22.8872			22.8872			22.8872
1959-04-19		9.35071		19.9869				(1959 warm seasonal max T (HadISST/ERSST))						19.9869			19.9869			19.9869
1959-04-30		9.31254		20.6937				(1959 warm seasonal max T (HadISST/ERSST))						20.6937			20.6937			20.6937
1959-05-09	9.13208		23.9003				NA	(1959 warm seasonal max T (HadISST/ERSST))					23.9003			23.9003			23.9003
1959-05-10		9.25946		21.6766										21.6766			21.6766			21.6766
1959-05-20		9.25514		21.7566										21.7566			21.7566			21.7566
1959-05-31		9.1723		23.2907										23.2907			23.2907			23.2907
1959-06-02	9.13949		23.7788										23.7788			23.7788			23.7788
1959-06-10		9.24927		21.8654										21.8654			21.8654			21.8654
1959-06-21		9.15514		23.6085										23.6085			23.6085			23.6085
1959-06-27	9.08135		24.732										24.732			24.732			24.732
1959-07-01		9.14276		23.8377										23.8377			23.8377			23.8377
1959-07-12		9.13997		23.8895										23.8895			23.8895			23.8895
1959-07-21	9.08598		24.6561										24.6561			24.6561			24.6561
1959-07-22		9.16928		23.3467										23.3467			23.3467			23.3467
1959-08-01		9.12749		24.1205										24.1205			24.1205			24.1205
1959-08-12		9.07823		25.0327										25.0327			25.0327			25.0327
1959-08-15	9.05859		25.1051										25.1051			25.1051			25.1051
1959-08-22		9.09176		24.7822										24.7822			24.7822			24.7822
1959-09-02		9.10882		24.4662										24.4662			24.4662			24.4662
1959-09-12	9.0767		24.8081										24.8081			24.8081			24.8081
1959-09-12		9.09444		24.7326										24.7326			24.7326			24.7326
1959-09-23		9.05069		25.5428										25.5428			25.5428			25.5428
1959-09-30		9.08266		24.9507										24.9507			24.9507			24.9507
1959-10-08		9.16762		23.3773										23.3773			23.3773			23.3773
1959-10-10	9.07508		24.8348										24.8348			24.8348			24.8348
1959-10-15		9.12424		24.1808										24.1808			24.1808			24.1808
1959-10-23		9.1769		23.2056										23.2056			23.2056			23.2056
1959-10-31		9.23015		22.2194										22.2194			22.2194			22.2194
1959-11-07		9.19238		22.9188										22.9188			22.9188			22.9188
1959-11-08	9.12481		24.0196										24.0196			24.0196			24.0196
1959-11-15		9.17253		23.2865										23.2865			23.2865			23.2865
1959-11-23		9.21969		22.4132										22.4132			22.4132			22.4132
1959-11-30		9.23295		22.1677										22.1677			22.1677			22.1677
1959-12-06	9.21539		22.5345										22.5345			22.5345			22.5345
1959-12-08		9.09777		24.671										24.671			24.671			24.671
1959-12-16		9.17945		23.1583										23.1583			23.1583			23.1583
1959-12-23		9.25353		21.7864										21.7864			21.7864			21.7864
1959-12-31		9.26564		21.5622										21.5622			21.5622			21.5622
1960-01-03	9.25021		21.9638										21.9638			21.9638			21.9638
1960-01-07		9.21605		22.4805										22.4805			22.4805			22.4805
1960-01-15		9.29284		21.0586										21.0586			21.0586			21.0586
1960-01-23		9.2217		22.376										22.376			22.376			22.376
1960-01-30		9.3384		20.2149										20.2149			20.2149			20.2149
1960-02-01	9.25071		21.9555				NA	(1959 warm seasonal max T (HadISST/ERSST))					21.9555			21.9555			21.9555
1960-02-07		9.37988		19.4466	b		NA	(1959 warm seasonal max T (HadISST/ERSST))						19.4466			19.4466			19.4466
1960-02-15		9.3504		19.9925			NA	(1959 warm seasonal max T (HadISST/ERSST))						19.9925			19.9925			19.9925
1960-02-22		9.35341		19.9369			NA	(1959 warm seasonal max T (HadISST/ERSST))						19.9369			19.9369			19.9369
1960-02-25	9.24697		22.0168					(1959 warm seasonal max T (HadISST/ERSST))					22.0168			22.0168			22.0168
1960-03-01		9.39391		19.1869	b		NA	(1959 warm seasonal max T (HadISST/ERSST))						19.1869			19.1869			19.1869
1960-03-09		9.43369		18.4503	b		NA	(1959 warm seasonal max T (HadISST/ERSST))						18.4503			18.4503			18.4503
1960-03-21	9.22727		22.3398				NA	(1959 warm seasonal max T (HadISST/ERSST))					22.3398			22.3398			22.3398
1960-03-24		9.36773		19.6716				(1959 warm seasonal max T (HadISST/ERSST))						19.6716			19.6716			19.6716
1960-04-08		9.34736		20.0488				(1959 warm seasonal max T (HadISST/ERSST))						20.0488			20.0488			20.0488
1960-04-14	9.23584		22.1994				NA	(1959 warm seasonal max T (HadISST/ERSST))					22.1994			22.1994			22.1994
1960-04-23		9.3153		20.6426										20.6426			20.6426			20.6426
1960-05-08		9.28664		21.1733										21.1733			21.1733			21.1733
1960-05-09	9.17138		23.2561										23.2561			23.2561			23.2561
1960-05-24		9.22089		22.391										22.391			22.391			22.391
1960-06-02	9.11786		24.1335										24.1335			24.1335			24.1335
1960-06-08		9.13396		24.0007										24.0007			24.0007			24.0007
1960-06-23		9.14911		23.7201										23.7201			23.7201			23.7201
1960-06-27	9.10914		24.2764										24.2764			24.2764			24.2764
1960-07-08		9.1409		23.8722										23.8722			23.8722			23.8722
1960-07-21	9.06543		24.993										24.993			24.993			24.993
1960-07-24		9.13239		24.0298										24.0298			24.0298			24.0298
1960-08-08		9.06763		25.2291										25.2291			25.2291			25.2291
1960-08-15	9.0243		25.6672										25.6672			25.6672			25.6672
1960-08-23		9.06303		25.3142										25.3142			25.3142			25.3142
1960-09-05	9.05756		25.122										25.122			25.122			25.122
1960-09-07		9.042		25.7037										25.7037			25.7037			25.7037
1960-09-23		9.034		25.8519										25.8519			25.8519			25.8519
1960-09-26	9.05042		25.2389										25.2389			25.2389			25.2389
1960-10-01		9.05395		25.4824										25.4824			25.4824			25.4824
1960-10-08		9.04849		25.5835										25.5835			25.5835			25.5835
1960-10-16		9.04271		25.6906										25.6906			25.6906			25.6906
1960-10-17	9.04794		25.2797										25.2797			25.2797			25.2797
1960-10-24		9.05859		25.3965										25.3965			25.3965			25.3965
1960-11-01		9.09417		24.7376										24.7376			24.7376			24.7376
1960-11-08	9.21273		22.5781										22.5781			22.5781			22.5781
1960-11-09		9.13273		24.0235										24.0235			24.0235			24.0235
1960-11-17		9.08136		24.9749										24.9749			24.9749			24.9749
1960-11-25		9.12797		24.1117										24.1117			24.1117			24.1117
1960-11-29	9.09901		24.4424										24.4424			24.4424			24.4424
1960-12-03		9.19383		22.892										22.892			22.892			22.892
1960-12-11		9.13919		23.9039										23.9039			23.9039			23.9039
1960-12-19		9.23472		22.1347										22.1347			22.1347			22.1347
1960-12-20	9.2309		22.2804										22.2804			22.2804			22.2804
1960-12-27		9.18109		23.1279										23.1279			23.1279			23.1279
1961-01-04		9.23392		22.1496										22.1496			22.1496			22.1496
1961-01-10	9.21191		22.5917										22.5917			22.5917			22.5917
1961-01-12		9.29252		21.0645										21.0645			21.0645			21.0645
1961-01-20		9.27293		21.4273										21.4273			21.4273			21.4273
1961-01-28		9.23137		22.1968										22.1968			22.1968			22.1968
1961-02-01	9.25128		21.9462				NA	1961 warm seasonal min T (ERSST)					21.9462			21.9462			21.9462
1961-02-05		9.31361		20.6738				1961 warm seasonal min T (ERSST)						20.6738			20.6738			20.6738
1961-02-13		9.27602		21.37				1961 warm seasonal min T (ERSST)						21.37			21.37			21.37
1961-02-21		9.28184		21.2622				1961 warm seasonal min T (ERSST)						21.2622			21.2622			21.2622
1961-02-25	9.24455		22.0566				NA	1961 warm seasonal min T (ERSST)					22.0566			22.0566			22.0566
1961-03-01		9.34119		20.1632				1961 warm seasonal min T (ERSST)						20.1632			20.1632			20.1632
1961-03-09		9.36777		19.6709				1961 warm seasonal min T (ERSST)						19.6709			19.6709			19.6709
1961-03-21	9.25702		21.8522				NA	1961 warm seasonal min T (ERSST)					21.8522			21.8522			21.8522
1961-03-27		9.30343		20.8624										20.8624			20.8624			20.8624
1961-04-14		9.29314		21.0529										21.0529			21.0529			21.0529
1961-04-15	9.22702		22.344										22.344			22.344			22.344
1961-05-02		9.17985		23.151										23.151			23.151			23.151
1961-05-09	9.20896		22.64										22.64			22.64			22.64
1961-05-20		9.19196		22.9266										22.9266			22.9266			22.9266
1961-06-02	9.02624		25.6355										25.6355			25.6355			25.6355
1961-06-07		9.16425		23.4399										23.4399			23.4399			23.4399
1961-06-25		9.11494		24.353										24.353			24.353			24.353
1961-06-27	9.01609		25.8019										25.8019			25.8019			25.8019
1961-07-13		9.17103		23.3143										23.3143			23.3143			23.3143
1961-07-21	9.02283		25.6914										25.6914			25.6914			25.6914
1961-07-31		9.17294		23.279										23.279			23.279			23.279
1961-08-15	9.0046		25.9902										25.9902			25.9902			25.9902
1961-08-18		9.13937		23.9005										23.9005			23.9005			23.9005
1961-09-05		9.10314		24.5716										24.5716			24.5716			24.5716
1961-09-18	9.04778		25.2823										25.2823			25.2823			25.2823
1961-09-23		9.04204		25.7029										25.7029			25.7029			25.7029
1961-10-11		9.06752		25.2312										25.2312			25.2312			25.2312
1961-10-22	9.04927		25.2578										25.2578			25.2578			25.2578
1961-10-30		9.08064		24.9882										24.9882			24.9882			24.9882
1961-11-17		9.09029		24.8095										24.8095			24.8095			24.8095
1961-11-25	9.14835		23.6336										23.6336			23.6336			23.6336
1961-12-06		9.09908		24.6467										24.6467			24.6467			24.6467
1961-12-24		9.08773		24.8568										24.8568			24.8568			24.8568
1961-12-29	9.10365		24.3664										24.3664			24.3664			24.3664
1962-01-12		9.33426		20.2914										20.2914			20.2914			20.2914
1962-01-30		9.32695		20.4269										20.4269			20.4269			20.4269
1962-02-01	9.28533		21.3881				NA						21.3881			21.3881			21.3881
1962-02-18		9.36998		19.6301										19.6301			19.6301			19.6301
1962-03-05	9.19861		22.8096										22.8096			22.8096			22.8096
1962-03-09		9.41348		18.8244	b		NA							18.8244			18.8244			18.8244
1962-04-02		9.39901		19.0924	b		NA							19.0924			19.0924			19.0924
1962-04-07	9.15425		23.537										23.537			23.537			23.537
1962-04-27		9.36506		19.7212			NA							19.7212			19.7212			19.7212
1962-05-09	9.07196		24.8859										24.8859			24.8859			24.8859
1962-05-22		9.37775		19.4862	b		NA							19.4862			19.4862			19.4862
1962-06-11	9.02896		25.5909										25.5909			25.5909			25.5909
1962-06-16		9.29004		21.1104										21.1104			21.1104			21.1104
1962-07-10		9.21326		22.5323										22.5323			22.5323			22.5323
1962-07-13	9.02581		25.6424										25.6424			25.6424			25.6424
1962-08-04		9.09604		24.7029										24.7029			24.7029			24.7029
1962-08-15	9.00612		25.9652										25.9652			25.9652			25.9652
1962-08-29		9.13383		24.0031										24.0031			24.0031			24.0031
1962-09-05	9.04621		25.308										25.308			25.308			25.308
1962-09-23		9.0571		25.4241										25.4241			25.4241			25.4241
1962-09-26	9.03545		25.4844										25.4844			25.4844			25.4844
1962-10-09		9.086		24.8888										24.8888			24.8888			24.8888
1962-10-17	9.11673		24.1519										24.1519			24.1519			24.1519
1962-10-26		9.06137		25.345										25.345			25.345			25.345
1962-11-08	9.14668		23.661										23.661			23.661			23.661
1962-11-12		9.12487		24.1691										24.1691			24.1691			24.1691
1962-11-28		9.26506		21.573										21.573			21.573			21.573
1962-11-29	9.24753		22.0077										22.0077			22.0077			22.0077
1962-12-15		9.09382		24.7441										24.7441			24.7441			24.7441
1962-12-20	9.24221		22.0948										22.0948			22.0948			22.0948
1963-01-01		9.27863		21.3218										21.3218			21.3218			21.3218
1963-01-10	9.22804		22.3272										22.3272			22.3272			22.3272
1963-01-17		9.23068		22.2096										22.2096			22.2096			22.2096
1963-02-01	9.33596		20.5581										20.5581			20.5581			20.5581
1963-02-03		9.26731		21.5312										21.5312			21.5312			21.5312
1963-02-20		9.20823		22.6254										22.6254			22.6254			22.6254
1963-02-28	9.17673		23.1683					Agung volcanic eruption (24 Feb 1963~)					23.1683			23.1683			23.1683
1963-03-09		9.33379		20.3003				Agung volcanic eruption (24 Feb 1963~)						20.3003			20.3003			20.3003
1963-03-28	9.09723		24.4717										24.4717			24.4717			24.4717
1963-04-02		9.19423		22.8847										22.8847			22.8847			22.8847
1963-04-25	9.08654		24.6468										24.6468			24.6468			24.6468
1963-04-27		9.07677		25.0599										25.0599			25.0599			25.0599
1963-05-22		9.11274		24.3936										24.3936			24.3936			24.3936
1963-05-23	9.02331		25.6835										25.6835			25.6835			25.6835
1963-06-16		9.15063		23.692										23.692			23.692			23.692
1963-06-20	9.07088		24.9036										24.9036			24.9036			24.9036
1963-07-10		9.03234		25.8827										25.8827			25.8827			25.8827
1963-07-18	8.98204		26.36										26.36			26.36			26.36
1963-08-04		9.02703		25.9809										25.9809			25.9809			25.9809
1963-08-15	8.96413		26.6536										26.6536			26.6536			26.6536
1963-08-29		8.99442		26.5848										26.5848			26.5848			26.5848
1963-09-18	9.01773		25.7749										25.7749			25.7749			25.7749
1963-09-23		8.98962		26.6737										26.6737			26.6737			26.6737
1963-10-17		9.00083		26.4661										26.4661			26.4661			26.4661
1963-10-22	9.03778		25.4462										25.4462			25.4462			25.4462
1963-11-10		9.09088		24.7986										24.7986			24.7986			24.7986
1963-11-25	9.32089		20.805										20.805			20.805			20.805
1963-12-04		9.01797		26.1488										26.1488			26.1488			26.1488
1963-12-28		8.99545		26.5658										26.5658			26.5658			26.5658
1963-12-29	9.3495		20.336										20.336			20.336			20.336
1964-01-21		9.16655		23.3972										23.3972			23.3972			23.3972
1964-02-01	9.35829		20.1919										20.1919			20.1919			20.1919
1964-02-14		9.16388		23.4468										23.4468			23.4468			23.4468
1964-02-29	9.28246		21.4351										21.4351			21.4351			21.4351
1964-03-09		9.25857		21.6931										21.6931			21.6931			21.6931
1964-03-27		9.2144		22.5112										22.5112			22.5112			22.5112
1964-03-28	9.34518		20.4069										20.4069			20.4069			20.4069
1964-04-14		9.12346		24.1952										24.1952			24.1952			24.1952
1964-04-25	9.16586		23.3465										23.3465			23.3465			23.3465
1964-05-02		9.23292		22.1681										22.1681			22.1681			22.1681
1964-05-20		9.208		22.6295										22.6295			22.6295			22.6295
1964-05-23	9.05718		25.1281										25.1281			25.1281			25.1281
1964-06-07		9.23446		22.1397										22.1397			22.1397			22.1397
1964-06-20	9.05833		25.1093										25.1093			25.1093			25.1093
1964-06-25		9.19061		22.9517										22.9517			22.9517			22.9517
1964-07-13		9.20107		22.758										22.758			22.758			22.758
1964-07-18	9.04474		25.3321										25.3321			25.3321			25.3321
1964-07-31		9.16798		23.3708										23.3708			23.3708			23.3708
1964-08-15	9.03033		25.5683										25.5683			25.5683			25.5683
1964-08-18		9.08005		24.999										24.999			24.999			24.999
1964-09-05		9.08985		24.8176										24.8176			24.8176			24.8176
1964-09-12	9.1019		24.3951										24.3951			24.3951			24.3951
1964-09-23		9.01125		26.2732										26.2732			26.2732			26.2732
1964-10-02		9.09878		24.6522										24.6522			24.6522			24.6522
1964-10-10	9.18711		22.9982										22.9982			22.9982			22.9982
1964-10-12		9.04918		25.5708										25.5708			25.5708			25.5708
1964-10-22		9.02185		26.0769										26.0769			26.0769			26.0769
1964-11-01		9.04741		25.6035										25.6035			25.6035			25.6035
1964-11-08	9.23232		22.2571										22.2571			22.2571			22.2571
1964-11-11		9.10908		24.4614										24.4614			24.4614			24.4614
1964-11-20		9.02079		26.0965										26.0965			26.0965			26.0965
1964-11-30		9.03844		25.7696										25.7696			25.7696			25.7696
1964-12-06	9.38918		19.6856										19.6856			19.6856			19.6856
1964-12-10		9.18457		23.0635										23.0635			23.0635			23.0635
1964-12-20		9.05547		25.4543										25.4543			25.4543			25.4543
1964-12-30		9.13343		24.0106										24.0106			24.0106			24.0106
1965-01-03	9.35292		20.28										20.28			20.28			20.28
1965-01-09		9.23854		22.0641										22.0641			22.0641			22.0641
1965-01-18		9.28804		21.1474										21.1474			21.1474			21.1474
1965-01-28		9.09865		24.6547										24.6547			24.6547			24.6547
1965-02-01	9.40131		19.4867										19.4867			19.4867			19.4867
1965-02-07		9.21229		22.5501										22.5501			22.5501			22.5501
1965-02-17		9.16459		23.4336										23.4336			23.4336			23.4336
1965-02-25	9.35489		20.2478										20.2478			20.2478			20.2478
1965-02-27		9.304		20.8519										20.8519			20.8519			20.8519
1965-03-09		9.30784		20.7807										20.7807			20.7807			20.7807
1965-03-20		9.28359		21.2298										21.2298			21.2298			21.2298
1965-03-21	9.26059		21.7937										21.7937			21.7937			21.7937
1965-04-01		9.25162		21.8219										21.8219			21.8219			21.8219
1965-04-12		9.20918		22.6078										22.6078			22.6078			22.6078
1965-04-15	9.17998		23.115										23.115			23.115			23.115
1965-04-24		9.21531		22.4943										22.4943			22.4943			22.4943
1965-05-06		9.21308		22.5355										22.5355			22.5355			22.5355
1965-05-09	9.10062		24.4161										24.4161			24.4161			24.4161
1965-05-17		9.05411		25.4795										25.4795			25.4795			25.4795
1965-05-29		9.1035		24.5649										24.5649			24.5649			24.5649
1965-06-02	9.05041		25.2393										25.2393			25.2393			25.2393
1965-06-10		9.10181		24.5961										24.5961			24.5961			24.5961
1965-06-21		9.04935		25.5676										25.5676			25.5676			25.5676
1965-06-27	9.07666		24.8089										24.8089			24.8089			24.8089
1965-07-03		9.04643		25.6217										25.6217			25.6217			25.6217
1965-07-15		9.10792		24.483										24.483			24.483			24.483
1965-07-21	9.04786		25.281										25.281			25.281			25.281
1965-07-26		9.06127		25.3468										25.3468			25.3468			25.3468
1965-08-07		9.0374		25.7889										25.7889			25.7889			25.7889
1965-08-15	8.97539		26.4691										26.4691			26.4691			26.4691
1965-08-19		8.94615		27.4787										27.4787			27.4787			27.4787
1965-08-30		8.98929		26.6799										26.6799			26.6799			26.6799
1965-09-11		9.03018		25.9226										25.9226			25.9226			25.9226
1965-09-23		8.91305		28.0917										28.0917			28.0917			28.0917
1965-09-26	9.0488		25.2656										25.2656			25.2656			25.2656
1965-10-13		9.09353		24.7494										24.7494			24.7494			24.7494
1965-11-03		8.99946		26.4915										26.4915			26.4915			26.4915
1965-11-08	9.1104		24.2557										24.2557			24.2557			24.2557
1965-11-24		9.20657		22.656										22.656			22.656			22.656
1965-12-15		9.19793		22.8161										22.8161			22.8161			22.8161
1965-12-20	9.15483		23.5274										23.5274			23.5274			23.5274
1966-01-05		9.2705		21.4722										21.4722			21.4722			21.4722
1966-01-26		9.1232		24.2										24.2			24.2			24.2
1966-02-01	9.2951		21.2279				dis-org			x	x		21.2279
1966-02-16		9.30459		20.841										20.841			20.841			20.841
1966-03-09		9.35023		19.9958										19.9958			19.9958			19.9958
1966-03-21	9.23036		22.2891				dis-org			x	x		22.2891
1966-03-23		9.3236		20.489										20.489			20.489			20.489
1966-04-06		9.242		21.9999										21.9999			21.9999			21.9999
1966-04-20		9.31797		20.5932										20.5932			20.5932			20.5932
1966-05-04		9.27358		21.4153										21.4153			21.4153			21.4153
1966-05-09	9.24648		22.025				dis-org			x	x		22.025
1966-05-18		9.29835		20.9566										20.9566			20.9566			20.9566
1966-06-01		9.25095		21.8343										21.8343			21.8343			21.8343
1966-06-16		9.21871		22.4313										22.4313			22.4313			22.4313
1966-06-27	9.14006		23.7694				dis-org			x	x		23.7694
1966-06-30		9.1934		22.9										22.9			22.9			22.9
1966-07-14		9.14764		23.7475										23.7475			23.7475			23.7475
1966-07-28		9.14935		23.7158										23.7158			23.7158			23.7158
1966-08-11		9.06454		25.2863										25.2863			25.2863			25.2863
1966-08-15	9.11248		24.2217				dis-org			x	x		24.2217
1966-08-25		9.22177		22.3746										22.3746			22.3746			22.3746
1966-09-08		9.08282		24.9478										24.9478			24.9478			24.9478
1966-09-23		8.99703		26.5364										26.5364			26.5364			26.5364
1966-09-26	9.1157		24.1688				dis-org			x	x		24.1688
1966-10-01		9.05232		25.5127										25.5127			25.5127			25.5127
1966-10-09		9.07548		25.0837										25.0837			25.0837			25.0837
1966-10-18		9.04167		25.7098										25.7098			25.7098			25.7098
1966-10-26		9.00487		26.3914										26.3914			26.3914			26.3914
1966-11-03		9.01902		26.1292										26.1292			26.1292			26.1292
1966-11-08	9.2279		22.3296				dis-org			x	x		22.3296
1966-11-12		9.03386		25.8544										25.8544			25.8544			25.8544
1966-11-20		9.09948		24.6392										24.6392			24.6392			24.6392
1966-11-28		9.11384		24.3734										24.3734			24.3734			24.3734
1966-12-07		9.1261		24.1463										24.1463			24.1463			24.1463
1966-12-15		9.16553		23.4161										23.4161			23.4161			23.4161
1966-12-20	9.22081		22.4457				dis-org			x	x		22.4457
1966-12-23		9.21469		22.5057										22.5057			22.5057			22.5057
1967-01-01		9.27041		21.474										21.474			21.474			21.474
1967-01-09		9.22259		22.3594										22.3594			22.3594			22.3594
1967-01-17		9.07968		25.006										25.006			25.006			25.006
1967-01-26		9.16458		23.4337										23.4337			23.4337			23.4337
1967-02-01	9.31764		20.8584				dis-org			x	x		20.8584
1967-02-03		9.17578		23.2264										23.2264			23.2264			23.2264
1967-02-12		9.17861		23.1739										23.1739			23.1739			23.1739
1967-02-20		9.17617		23.219										23.219			23.219			23.219
1967-02-28		9.2879		21.1501										21.1501			21.1501			21.1501
1967-03-09		9.33066		20.3582										20.3582			20.3582			20.3582
1967-03-20		9.28493		21.205										21.205			21.205			21.205
1967-03-21	9.28446		21.4023				dis-org			x	x		21.4023
1967-04-01		9.26465		21.5805										21.5805			21.5805			21.5805
1967-04-12		9.24608		21.9244										21.9244			21.9244			21.9244
1967-04-24		9.28861		21.1369										21.1369			21.1369			21.1369
1967-05-06		9.26788		21.5208										21.5208			21.5208			21.5208
1967-05-09	9.19374		22.8895				dis-org			x	x		22.8895
1967-05-17		9.24151		22.0092										22.0092			22.0092			22.0092
1967-05-29		9.21478		22.504										22.504			22.504			22.504
1967-06-10		9.14007		23.8876										23.8876			23.8876			23.8876
1967-06-21		9.16204		23.4808										23.4808			23.4808			23.4808
1967-06-27	9.16119		23.4232				dis-org			x	x		23.4232
1967-07-03		9.08462		24.9144										24.9144			24.9144			24.9144
1967-07-15		9.0955		24.7129										24.7129			24.7129			24.7129
1967-07-26		9.10742		24.4923										24.4923			24.4923			24.4923
1967-08-07		9.09036		24.8081										24.8081			24.8081			24.8081
1967-08-15	9.10284		24.3796				dis-org			x	x		24.3796
1967-08-19		9.12433		24.1791										24.1791			24.1791			24.1791
1967-08-30		9.03059		25.915										25.915			25.915			25.915
1967-09-08	9.14003		23.77				dis-org			x	x		23.77
1967-09-11		9.03638		25.8078										25.8078			25.8078			25.8078
1967-09-23		8.99327		26.6061										26.6061			26.6061			26.6061
1967-09-30		9.06825		25.2176										25.2176			25.2176			25.2176
1967-10-02	9.30743		21.0258				dis-org			x	x		21.0258
1967-10-08		9.03249		25.8798										25.8798			25.8798			25.8798
1967-10-15		9.04138		25.7151										25.7151			25.7151			25.7151
1967-10-23		9.04108		25.7208										25.7208			25.7208			25.7208
1967-10-26	9.12047		24.0907				dis-org			x	x		24.0907
1967-10-31		9.21613		22.4792										22.4792			22.4792			22.4792
1967-11-07		9.158		23.5555										23.5555			23.5555			23.5555
1967-11-15		9.01946		26.121										26.121			26.121			26.121
1967-11-20	9.2918		21.282				dis-org			x	x		21.282
1967-11-23		9.18463		23.0624										23.0624			23.0624			23.0624
1967-11-30		9.15444		23.6214										23.6214			23.6214			23.6214
1967-12-08		9.17021		23.3294										23.3294			23.3294			23.3294
1967-12-14	9.44309		18.8018				dis-org			x	x		18.8018
1967-12-16		9.07053		25.1754										25.1754			25.1754			25.1754
1967-12-23		9.21373		22.5235										22.5235			22.5235			22.5235
1967-12-31		9.16211		23.4794										23.4794			23.4794			23.4794
1968-01-07	9.37084		19.9863				dis-org			x	x		19.9863
1968-01-07		9.1602		23.5149										23.5149			23.5149			23.5149
1968-01-15		9.18601		23.0369										23.0369			23.0369			23.0369
1968-01-23		9.20299		22.7225										22.7225			22.7225			22.7225
1968-01-30		9.19875		22.8009										22.8009			22.8009			22.8009
1968-02-01	9.47455		18.2861				dis-org			x	x		18.2861
1968-02-06	9.44073		18.8405				dis-org			x	x		18.8405
1968-02-07		9.31183		20.7069										20.7069			20.7069			20.7069
1968-02-12	9.3344		20.5835				dis-org			x	x		20.5835
1968-02-15		9.23136		22.1971										22.1971			22.1971			22.1971
1968-02-18	9.39051		19.6638				dis-org			x	x		19.6638
1968-02-22		9.28205		21.2584										21.2584			21.2584			21.2584
1968-02-24	9.34693		20.3782				dis-org			x	x		20.3782
1968-03-01	9.38314		19.7847				dis-org			x	x		19.7847
1968-03-01		9.32572		20.4497										20.4497			20.4497			20.4497
1968-03-07	9.34992		20.3292				dis-org			x	x		20.3292
1968-03-09		9.34966		20.0062										20.0062			20.0062			20.0062
1968-03-13	9.28019		21.4723				dis-org			x	x		21.4723
1968-03-19	9.28692		21.3619				dis-org			x	x		21.3619
1968-03-23		9.29665		20.988										20.988			20.988			20.988
1968-03-25	9.30069		21.1363				dis-org			x	x		21.1363
1968-03-31	9.21617		22.5219				dis-org			x	x		22.5219
1968-04-06	9.33419		20.587				dis-org			x	x		20.587
1968-04-06		9.24743		21.8995										21.8995			21.8995			21.8995
1968-04-12	9.27051		21.631				dis-org			x	x		21.631
1968-04-18	9.24397		22.0661				dis-org			x	x		22.0661
1968-04-20		9.22334		22.3456										22.3456			22.3456			22.3456
1968-04-24	9.324		20.7541				dis-org			x	x		20.7541
1968-04-30	9.2887		21.3328				dis-org			x	x		21.3328
1968-05-04		9.22994		22.2233										22.2233			22.2233			22.2233
1968-05-06	9.3249		20.7394				dis-org			x	x		20.7394
1968-05-12	9.2301		22.2935				dis-org			x	x		22.2935
1968-05-17	9.30804		21.0157				dis-org			x	x		21.0157
1968-05-18		9.16209		23.4797										23.4797			23.4797			23.4797
1968-05-23	9.28258		21.4332				dis-org			x	x		21.4332
1968-05-29	9.2259		22.3622				dis-org			x	x		22.3622
1968-06-01		9.08132		24.9756				1968 warm seasonal max T						24.9756			24.9756			24.9756
1968-06-04	9.18424		23.0453				dis-org	1968 warm seasonal max T		x	x		23.0453
1968-06-10	9.15316		23.5548				dis-org	1968 warm seasonal max T		x	x		23.5548
1968-06-16	9.16096		23.4269				dis-org	1968 warm seasonal max T		x	x		23.4269
1968-06-16		9.07882		25.0219				1968 warm seasonal max T						25.0219			25.0219			25.0219
1968-06-22	9.06139		25.0592				dis-org	1968 warm seasonal max T		x	x		25.0592
1968-06-28	9.1073		24.3066				dis-org	1968 warm seasonal max T		x	x		24.3066
1968-06-30		9.12682		24.133				1968 warm seasonal max T						24.133			24.133			24.133
1968-07-04	9.09724		24.4715				dis-org	1968 warm seasonal max T		x	x		24.4715
1968-07-10	9.06592		24.985				dis-org	1968 warm seasonal max T		x	x		24.985
1968-07-14		9.09037		24.808				1968 warm seasonal max T						24.808			24.808			24.808
1968-07-16	9.15024		23.6027				dis-org	1968 warm seasonal max T		x	x		23.6027
1968-07-22	9.12203		24.0651				dis-org	1968 warm seasonal max T		x	x		24.0651
1968-07-28	9.09818		24.4561				dis-org	1968 warm seasonal max T		x	x		24.4561
1968-07-28		9.08489		24.9095				1968 warm seasonal max T						24.9095			24.9095			24.9095
1968-08-03	9.1276		23.9737				dis-org	1968 warm seasonal max T		x	x		23.9737
1968-08-09	9.05784		25.1173				dis-org	1968 warm seasonal max T		x	x		25.1173
1968-08-11		9.0847		24.913				1968 warm seasonal max T						24.913			24.913			24.913
1968-08-15	9.05002		25.2455				dis-org	1968 warm seasonal max T		x	x		25.2455
1968-08-25		9.12236		24.2155				1968 warm seasonal max T						24.2155			24.2155			24.2155
1968-09-02	9.11106		24.2449				dis-org	1968 warm seasonal max T		x	x		24.2449
1968-09-08		9.09546		24.7137				1968 warm seasonal max T						24.7137			24.7137			24.7137
1968-09-21	9.15698		23.4921				dis-org	1968 warm seasonal max T		x	x		23.4921
1968-09-23		9.00183		26.4477				1968 warm seasonal max T						26.4477			26.4477			26.4477
1968-10-01		9.05473		25.4679				1968 warm seasonal max T						25.4679			25.4679			25.4679
1968-10-09		9.07484		25.0955				1968 warm seasonal max T						25.0955			25.0955			25.0955
1968-10-10	9.08482		24.6751				dis-org	1968 warm seasonal max T		x	x		24.6751
1968-10-18		9.11362		24.3775				1968 warm seasonal max T						24.3775			24.3775			24.3775
1968-10-26		9.09291		24.761				1968 warm seasonal max T						24.761			24.761			24.761
1968-10-29	9.14007		23.7694				dis-org	1968 warm seasonal max T		x	x		23.7694
1968-11-03		9.07779		25.0409				1968 warm seasonal max T						25.0409			25.0409			25.0409
1968-11-12		9.13024		24.0697				1968 warm seasonal max T						24.0697			24.0697			24.0697
1968-11-17	9.14967		23.612				dis-org	1968 warm seasonal max T		x	x		23.612
1968-11-20		9.20031		22.772				1968 warm seasonal max T						22.772			22.772			22.772
1968-11-28		9.19872		22.8015				1968 warm seasonal max T						22.8015			22.8015			22.8015
1968-12-06	9.14285		23.7237				dis-org	1968 warm seasonal max T		x	x		23.7237
1968-12-07		9.13713		23.9421				1968 warm seasonal max T						23.9421			23.9421			23.9421
1968-12-15		9.22606		22.2953				1968 warm seasonal max T						22.2953			22.2953			22.2953
1968-12-23		9.20292		22.7238				1968 warm seasonal max T						22.7238			22.7238			22.7238
1968-12-25	9.16078		23.4298				dis-org	1968 warm seasonal max T		x	x		23.4298
1969-01-01		9.2628		21.6147				Makai Pier construction (~1969), (1968 warm seasonal max T (NMFS/HadISST/ERSST))						21.6147			21.6147			21.6147
1969-01-09		9.21343		22.529				Makai Pier construction (~1969), (1968 warm seasonal max T (NMFS/HadISST/ERSST))						22.529			22.529			22.529
1969-01-13	9.115		24.1804				dis-org	Makai Pier construction (~1969), (1968 warm seasonal max T (NMFS/HadISST/ERSST))		x	x		24.1804
1969-01-17		9.22541		22.3072				Makai Pier construction (~1969), (1968 warm seasonal max T (NMFS/HadISST/ERSST))						22.3072			22.3072			22.3072
1969-01-26		9.2686		21.5075				Makai Pier construction (~1969), (1968 warm seasonal max T (NMFS/HadISST/ERSST))						21.5075			21.5075			21.5075
1969-02-01	9.20503		22.7043				dis-org	Makai Pier construction (~1969), (1968 warm seasonal max T (NMFS/HadISST/ERSST))		x	x		22.7043
1969-02-03		9.25076		21.8377				Makai Pier construction (~1969), (1968 warm seasonal max T (NMFS/HadISST/ERSST))						21.8377			21.8377			21.8377
1969-02-17	9.11869		24.1199					Makai Pier construction (~1969), (1968 warm seasonal max T (NMFS/HadISST/ERSST))					24.1199			24.1199			24.1199
1969-02-12		9.27309		21.4243				Makai Pier construction (~1969), (1968 warm seasonal max T (NMFS/HadISST/ERSST))						21.4243			21.4243			21.4243
1969-03-05	9.10436		24.3547					Makai Pier construction (~1969), (1968 warm seasonal max T (NMFS/HadISST/ERSST))					24.3547			24.3547			24.3547
1969-02-20		9.34789		20.0391				Makai Pier construction (~1969), (1968 warm seasonal max T (NMFS/HadISST/ERSST))						20.0391			20.0391			20.0391
1969-02-28		9.34975		20.0045				Makai Pier construction (~1969), (1968 warm seasonal max T (NMFS/HadISST/ERSST))						20.0045			20.0045			20.0045
1969-03-21	9.11842		24.1243					Makai Pier construction (~1969), (1968 warm seasonal max T (NMFS/HadISST/ERSST))					24.1243			24.1243			24.1243
1969-03-09		9.37245		19.5843	b, g		NA	Makai Pier construction (~1969), (1968 warm seasonal max T (NMFS/HadISST/ERSST))						19.5843			19.5843			19.5843
1969-04-07	9.12258		24.056					Makai Pier construction (~1969), (1968 warm seasonal max T (NMFS/HadISST/ERSST))					24.056			24.056			24.056
1969-04-23	9.11864		24.1206					Makai Pier construction (~1969), (1968 warm seasonal max T (NMFS/HadISST/ERSST))					24.1206			24.1206			24.1206
1969-03-25		9.24849		21.8798				Makai Pier construction (~1969), (1968 warm seasonal max T (NMFS/HadISST/ERSST))						21.8798			21.8798			21.8798
1969-05-09	9.10028		24.4217					Makai Pier construction (~1969), (1968 warm seasonal max T (NMFS/HadISST/ERSST))					24.4217			24.4217			24.4217
1969-05-25	9.08182		24.7243					Makai Pier construction (~1969), (1968 warm seasonal max T (NMFS/HadISST/ERSST))					24.7243			24.7243			24.7243
1969-04-11		9.26839		21.5113				Makai Pier construction (~1969), (1968 warm seasonal max T (NMFS/HadISST/ERSST))						21.5113			21.5113			21.5113
1969-06-11	9.12403		24.0322					Makai Pier construction (~1969), (1968 warm seasonal max T (NMFS/HadISST/ERSST))					24.0322			24.0322			24.0322
1969-04-27		9.21892		22.4273				Makai Pier construction (~1969), (1968 warm seasonal max T (NMFS/HadISST/ERSST))						22.4273			22.4273			22.4273
1969-06-27	9.1033		24.3721					Makai Pier construction (~1969), (1968 warm seasonal max T (NMFS/HadISST/ERSST))					24.3721			24.3721			24.3721
1969-07-13	9.15806		23.4745					Makai Pier construction (~1969), (1968 warm seasonal max T (NMFS/HadISST/ERSST))					23.4745			23.4745			23.4745
1969-05-14		9.25415		21.775				Makai Pier construction (~1969), (1968 warm seasonal max T (NMFS/HadISST/ERSST))						21.775			21.775			21.775
1969-07-29	9.05844		25.1075					Makai Pier construction (~1969), (1968 warm seasonal max T (NMFS/HadISST/ERSST))					25.1075			25.1075			25.1075
1969-08-15	9.04499		25.328					Makai Pier construction (~1969), (1968 warm seasonal max T (NMFS/HadISST/ERSST))					25.328			25.328			25.328
1969-05-30		9.16565		23.414				Makai Pier construction (~1969), (1968 warm seasonal max T (NMFS/HadISST/ERSST))						23.414			23.414			23.414
1969-08-20	9.09322		24.5374					Makai Pier construction (~1969), (1968 warm seasonal max T (NMFS/HadISST/ERSST))					24.5374			24.5374			24.5374
1969-06-16		9.16602		23.4071				Makai Pier construction (~1969), (1968 warm seasonal max T (NMFS/HadISST/ERSST))						23.4071			23.4071			23.4071
1969-08-26	9.08213		24.7192					Makai Pier construction (~1969), (1968 warm seasonal max T (NMFS/HadISST/ERSST))					24.7192			24.7192			24.7192
1969-09-01	9.09795		24.4598					Makai Pier construction (~1969), (1968 warm seasonal max T (NMFS/HadISST/ERSST))					24.4598			24.4598			24.4598
1969-07-02		9.18567		23.0432				Makai Pier construction (~1969), (1968 warm seasonal max T (NMFS/HadISST/ERSST))						23.0432			23.0432			23.0432
1969-09-06	9.07086		24.904					Makai Pier construction (~1969), (1968 warm seasonal max T (NMFS/HadISST/ERSST))					24.904			24.904			24.904
1969-09-12	9.11481		24.1834					Makai Pier construction (~1969), (1968 warm seasonal max T (NMFS/HadISST/ERSST))					24.1834			24.1834			24.1834
1969-07-19		9.03047		25.9171				Makai Pier construction (~1969), (1968 warm seasonal max T (NMFS/HadISST/ERSST))						25.9171			25.9171			25.9171
1969-09-18	9.14994		23.6075					Makai Pier construction (~1969), (1968 warm seasonal max T (NMFS/HadISST/ERSST))					23.6075			23.6075			23.6075
1969-08-04		9.07692		25.057				Makai Pier construction (~1969), (1968 warm seasonal max T (NMFS/HadISST/ERSST))						25.057			25.057			25.057
1969-09-23	9.08075		24.7418					Makai Pier construction (~1969), (1968 warm seasonal max T (NMFS/HadISST/ERSST))					24.7418			24.7418			24.7418
1969-09-29	9.06666		24.9729					Makai Pier construction (~1969), (1968 warm seasonal max T (NMFS/HadISST/ERSST))					24.9729			24.9729			24.9729
1969-08-21		9.0966		24.6926				Makai Pier construction (~1969), (1968 warm seasonal max T (NMFS/HadISST/ERSST))						24.6926			24.6926			24.6926
1969-10-05	9.08154		24.7289					Makai Pier construction (~1969), (1968 warm seasonal max T (NMFS/HadISST/ERSST))					24.7289			24.7289			24.7289
1969-10-10	9.12257		24.0563					Makai Pier construction (~1969), (1968 warm seasonal max T (NMFS/HadISST/ERSST))					24.0563			24.0563			24.0563
1969-09-06		9.061		25.3518				Makai Pier construction (~1969), (1968 warm seasonal max T (NMFS/HadISST/ERSST))						25.3518			25.3518			25.3518
1969-10-16	9.19135		22.9286					Makai Pier construction (~1969), (1968 warm seasonal max T (NMFS/HadISST/ERSST))					22.9286			22.9286			22.9286
1969-10-22	9.19291		22.9032					Makai Pier construction (~1969), (1968 warm seasonal max T (NMFS/HadISST/ERSST))					22.9032			22.9032			22.9032
1969-09-23		8.99022		26.6626				Makai Pier construction (~1969), (1968 warm seasonal max T (NMFS/HadISST/ERSST))						26.6626			26.6626			26.6626
1969-10-27	9.22309		22.4083					Makai Pier construction (~1969), (1968 warm seasonal max T (NMFS/HadISST/ERSST))					22.4083			22.4083			22.4083
1969-11-02	9.23385		22.232					Makai Pier construction (~1969), (1968 warm seasonal max T (NMFS/HadISST/ERSST))					22.232			22.232			22.232
1969-10-06		9.0611		25.35				Makai Pier construction (~1969), (1968 warm seasonal max T (NMFS/HadISST/ERSST))						25.35			25.35			25.35
1969-11-08	9.20782		22.6587					Makai Pier construction (~1969), (1968 warm seasonal max T (NMFS/HadISST/ERSST))					22.6587			22.6587			22.6587
1969-11-13	9.24249		22.0903					Makai Pier construction (~1969), (1968 warm seasonal max T (NMFS/HadISST/ERSST))					22.0903			22.0903			22.0903
1969-10-20		9.08242		24.9553				Makai Pier construction (~1969), (1968 warm seasonal max T (NMFS/HadISST/ERSST))						24.9553			24.9553			24.9553
1969-11-19	9.23525		22.209					Makai Pier construction (~1969), (1968 warm seasonal max T (NMFS/HadISST/ERSST))					22.209			22.209			22.209
1969-11-03		9.06186		25.3358				Makai Pier construction (~1969), (1968 warm seasonal max T (NMFS/HadISST/ERSST))						25.3358			25.3358			25.3358
1969-11-25	9.20959		22.6297					Makai Pier construction (~1969), (1968 warm seasonal max T (NMFS/HadISST/ERSST))					22.6297			22.6297			22.6297
1969-11-30	9.219		22.4754					Makai Pier construction (~1969), (1968 warm seasonal max T (NMFS/HadISST/ERSST))					22.4754			22.4754			22.4754
1969-11-17		9.1439		23.8166				Makai Pier construction (~1969), (1968 warm seasonal max T (NMFS/HadISST/ERSST))						23.8166			23.8166			23.8166
1969-12-06	9.2078		22.6589					Makai Pier construction (~1969), (1968 warm seasonal max T (NMFS/HadISST/ERSST))					22.6589			22.6589			22.6589
1969-12-12	9.12231		24.0604					Makai Pier construction (~1969), (1968 warm seasonal max T (NMFS/HadISST/ERSST))					24.0604			24.0604			24.0604
1969-12-01		9.12086		24.2433				Makai Pier construction (~1969), (1968 warm seasonal max T (NMFS/HadISST/ERSST))						24.2433			24.2433			24.2433
1969-12-17	9.19335		22.8959					Makai Pier construction (~1969), (1968 warm seasonal max T (NMFS/HadISST/ERSST))					22.8959			22.8959			22.8959
1969-12-23	9.2072		22.6689					Makai Pier construction (~1969), (1968 warm seasonal max T (NMFS/HadISST/ERSST))					22.6689			22.6689			22.6689
1969-12-15		9.29732		20.9756				Makai Pier construction (~1969), (1968 warm seasonal max T (NMFS/HadISST/ERSST))						20.9756			20.9756			20.9756
1969-12-29	9.22294		22.4107					Makai Pier construction (~1969), (1968 warm seasonal max T (NMFS/HadISST/ERSST))					22.4107			22.4107			22.4107
1969-12-29		9.4691		17.7945	b		NA	Makai Pier construction (~1969), (1968 warm seasonal max T (NMFS/HadISST/ERSST))						17.7945			17.7945			17.7945
1970-01-03	9.18436		23.0432					Makai Pier construction (~1969), (1968 warm seasonal max T (NMFS/HadISST/ERSST))					23.0432			23.0432			23.0432
1970-01-09	9.23078		22.2823					Makai Pier construction (~1969), (1968 warm seasonal max T (NMFS/HadISST/ERSST))					22.2823			22.2823			22.2823
1970-01-12		9.4054		18.974	b		NA	Makai Pier construction (~1969), (1968 warm seasonal max T (NMFS/HadISST/ERSST))						18.974			18.974			18.974
1970-01-15	9.2162		22.5214					Makai Pier construction (~1969), (1968 warm seasonal max T (NMFS/HadISST/ERSST))					22.5214			22.5214			22.5214
1970-01-20	9.32254		20.7781					Makai Pier construction (~1969), (1968 warm seasonal max T (NMFS/HadISST/ERSST))					20.7781			20.7781			20.7781
1970-01-26		9.33577		20.2635			NA	Makai Pier construction (~1969), (1968 warm seasonal max T (NMFS/HadISST/ERSST))						20.2635			20.2635			20.2635
1970-02-01	9.40354		19.4502					Makai Pier construction (~1969), (1968 warm seasonal max T (NMFS/HadISST/ERSST))					19.4502			19.4502			19.4502
1970-02-09		9.28072		21.283			NA	Makai Pier construction (~1969), (1968 warm seasonal max T (NMFS/HadISST/ERSST))						21.283			21.283			21.283
1970-02-23		9.36203		19.7772			NA	Makai Pier construction (~1969), (1968 warm seasonal max T (NMFS/HadISST/ERSST))						19.7772			19.7772			19.7772
1970-03-05	9.38276		19.7909					Makai Pier construction (~1969), (1968 warm seasonal max T (NMFS/HadISST/ERSST))					19.7909			19.7909			19.7909
1970-03-09		9.52465		16.7657	b, f		NA	Makai Pier construction (~1969), (1968 warm seasonal max T (NMFS/HadISST/ERSST))						16.7657			16.7657			16.7657
1970-03-28		9.41558		18.7856	b		NA	Makai Pier construction (~1969), (1968 warm seasonal max T (NMFS/HadISST/ERSST))						18.7856			18.7856			18.7856
1970-04-07	9.35069		20.3166					Makai Pier construction (~1969), (1968 warm seasonal max T (NMFS/HadISST/ERSST))					20.3166			20.3166			20.3166
1970-04-17		9.31633		20.6234				Makai Pier construction (~1969), (1968 warm seasonal max T (NMFS/HadISST/ERSST))						20.6234			20.6234			20.6234
1970-05-07		9.30259		20.878				Makai Pier construction (~1969), (1968 warm seasonal max T (NMFS/HadISST/ERSST))						20.878			20.878			20.878
1970-05-09	9.33768		20.5298					Makai Pier construction (~1969), (1968 warm seasonal max T (NMFS/HadISST/ERSST))					20.5298			20.5298			20.5298
1970-05-27		9.27157		21.4523				Makai Pier construction (~1969), (1968 warm seasonal max T (NMFS/HadISST/ERSST))						21.4523			21.4523			21.4523
1970-06-11	9.16338		23.3872					Makai Pier construction (~1969), (1968 warm seasonal max T (NMFS/HadISST/ERSST))					23.3872			23.3872			23.3872
1970-06-16		9.27348		21.4171				Makai Pier construction (~1969), (1968 warm seasonal max T (NMFS/HadISST/ERSST))						21.4171			21.4171			21.4171
1970-07-05		9.29126		21.0878				Makai Pier construction (~1969), (1968 warm seasonal max T (NMFS/HadISST/ERSST))						21.0878			21.0878			21.0878
1970-07-13	9.10316		24.3744					Makai Pier construction (~1969), (1968 warm seasonal max T (NMFS/HadISST/ERSST))					24.3744			24.3744			24.3744
1970-07-25		9.27572		21.3755				Makai Pier construction (~1969), (1968 warm seasonal max T (NMFS/HadISST/ERSST))						21.3755			21.3755			21.3755
1970-08-14		9.19131		22.9387				Makai Pier construction (~1969), (1968 warm seasonal max T (NMFS/HadISST/ERSST))						22.9387			22.9387			22.9387
1970-08-15	9.03228		25.5364					Makai Pier construction (~1969), (1968 warm seasonal max T (NMFS/HadISST/ERSST))					25.5364			25.5364			25.5364
1970-09-03		9.12535		24.1602										24.1602			24.1602			24.1602
1970-09-08	9.19485		22.8713										22.8713			22.8713			22.8713
1970-09-23		9.09347		24.7505										24.7505			24.7505			24.7505
1970-10-02	9.11996		24.0991										24.0991			24.0991			24.0991
1970-10-13		9.22886		22.2433										22.2433			22.2433			22.2433
1970-10-26	9.13998		23.7709										23.7709			23.7709			23.7709
1970-11-03		9.3633		19.7537										19.7537			19.7537			19.7537
1970-11-20	9.25801		21.836										21.836			21.836			21.836
1970-11-24		9.25384		21.7807										21.7807			21.7807			21.7807
1970-12-14	9.28476		21.3973										21.3973			21.3973			21.3973
1970-12-15		9.33642		20.2515										20.2515			20.2515			20.2515
1971-01-05		9.3895		19.2685	b		NA	1971 cold seasonal min T (NMFS)						19.2685			19.2685			19.2685
1971-01-07	9.19756		22.827					1971 cold seasonal min T (NMFS)					22.827			22.827			22.827
1971-01-26		9.33118		20.3486			NA	1971 cold seasonal min T (NMFS)						20.3486			20.3486			20.3486
1971-02-01	9.29885		21.1664					1971 cold seasonal min T (NMFS)					21.1664			21.1664			21.1664
1971-02-16		9.37124		19.6066	b		NA	1971 cold seasonal min T (NMFS)						19.6066			19.6066			19.6066
1971-02-25	9.29757		21.1874					1971 cold seasonal min T (NMFS)					21.1874			21.1874			21.1874
1971-03-09		9.41398		18.8151	b		NA	1971 cold seasonal min T (NMFS)						18.8151			18.8151			18.8151
1971-03-21	9.219		22.4754										22.4754			22.4754			22.4754
1971-03-31		9.33441		20.2887										20.2887			20.2887			20.2887
1971-04-15	9.2702		21.6361										21.6361			21.6361			21.6361
1971-04-22		9.17434		23.253										23.253			23.253			23.253
1971-05-09	9.26566		21.7105										21.7105			21.7105			21.7105
1971-05-14		9.24405		21.962										21.962			21.962			21.962
1971-06-02	9.23062		22.285										22.285			22.285			22.285
1971-06-05		9.12168		24.2281										24.2281			24.2281			24.2281
1971-06-27	9.22104		22.4419										22.4419			22.4419			22.4419
1971-06-27		9.13825		23.9212										23.9212			23.9212			23.9212
1971-07-19		9.08893		24.8347										24.8347			24.8347			24.8347
1971-07-21	9.11688		24.1494										24.1494			24.1494			24.1494
1971-08-10		9.0498		25.5592										25.5592			25.5592			25.5592
1971-08-15	9.02162		25.7112										25.7112			25.7112			25.7112
1971-09-01		9.02923		25.9403										25.9403			25.9403			25.9403
1971-09-02	9.08132		24.7324										24.7324			24.7324			24.7324
1971-09-21	9.10522		24.3406										24.3406			24.3406			24.3406
1971-09-23		9.00196		26.4451										26.4451			26.4451			26.4451
1971-10-10	9.16668		23.3331										23.3331			23.3331			23.3331
1971-10-11		9.04288		25.6875										25.6875			25.6875			25.6875
1971-10-29	9.20659		22.6788										22.6788			22.6788			22.6788
1971-10-30		9.12215		24.2194										24.2194			24.2194			24.2194
1971-11-17	9.23142		22.2718										22.2718			22.2718			22.2718
1971-11-18		9.06197		25.3339										25.3339			25.3339			25.3339
1971-12-06	9.16562		23.3505										23.3505			23.3505			23.3505
1971-12-06		9.07758		25.0449										25.0449			25.0449			25.0449
1971-12-25	9.24203		22.0979										22.0979			22.0979			22.0979
1971-12-25		9.10877		24.4672										24.4672			24.4672			24.4672
1972-01-13	9.25036		21.9613										21.9613			21.9613			21.9613
1972-01-13		9.18346		23.0841										23.0841			23.0841			23.0841
1972-01-31		9.19452		22.8792										22.8792			22.8792			22.8792
1972-02-01	9.34903		20.3438										20.3438			20.3438			20.3438
1972-02-19		9.30232		20.883										20.883			20.883			20.883
1972-03-04	9.3209		20.805										20.805			20.805			20.805
1972-03-09		9.33561		20.2665										20.2665			20.2665			20.2665
1972-03-23		9.32252		20.5089										20.5089			20.5089			20.5089
1972-04-06	9.30284		21.101										21.101			21.101			21.101
1972-04-06		9.31437		20.6598										20.6598			20.6598			20.6598
1972-04-20		9.30367		20.8579										20.8579			20.8579			20.8579
1972-05-04		9.15371		23.635										23.635			23.635			23.635
1972-05-09	9.20362		22.7276										22.7276			22.7276			22.7276
1972-05-18		9.306		20.8149										20.8149			20.8149			20.8149
1972-06-01		9.18974		22.9678										22.9678			22.9678			22.9678
1972-06-10	9.086		24.6558										24.6558			24.6558			24.6558
1972-06-16		9.2433		21.976										21.976			21.976			21.976
1972-06-30		9.17361		23.2664										23.2664			23.2664			23.2664
1972-07-13	9.12268		24.0545										24.0545			24.0545			24.0545
1972-07-14		9.15479		23.6151										23.6151			23.6151			23.6151
1972-07-28		9.11224		24.4029										24.4029			24.4029			24.4029
1972-08-11		9.16977		23.3377										23.3377			23.3377			23.3377
1972-08-15	9.07069		24.9067										24.9067			24.9067			24.9067
1972-08-25		9.11326		24.384										24.384			24.384			24.384
1972-09-02	9.07483		24.8388										24.8388			24.8388			24.8388
1972-09-08		9.10981		24.4479										24.4479			24.4479			24.4479
1972-09-21	9.07253		24.8765										24.8765			24.8765			24.8765
1972-09-23		9.04708		25.6097										25.6097			25.6097			25.6097
1972-10-10	9.11304		24.2125										24.2125			24.2125			24.2125
1972-10-13		9.1938		22.8926										22.8926			22.8926			22.8926
1972-10-29	9.14219		23.7346										23.7346			23.7346			23.7346
1972-11-03		9.19793		22.8161										22.8161			22.8161			22.8161
1972-11-17	9.17781		23.1507										23.1507			23.1507			23.1507
1972-11-24		9.20838		22.6227										22.6227			22.6227			22.6227
1972-12-06	9.22582		22.3636										22.3636			22.3636			22.3636
1972-12-15		9.31647		20.621										20.621			20.621			20.621
1972-12-25	9.34549		20.4019										20.4019			20.4019			20.4019
1973-01-05		9.40799		18.9261	b		NA							18.9261			18.9261			18.9261
1973-01-13	9.28714		21.3584										21.3584			21.3584			21.3584
1973-01-26		9.40705		18.9435	b		NA							18.9435			18.9435			18.9435
1973-02-01	9.35803		20.1963										20.1963			20.1963			20.1963
1973-02-16		9.41229		18.8464	b		NA							18.8464			18.8464			18.8464
1973-02-28	9.31015		20.9811										20.9811			20.9811			20.9811
1973-03-09		9.44531		18.2351	b		NA							18.2351			18.2351			18.2351
1973-03-28	9.31954		20.8272										20.8272			20.8272			20.8272
1973-03-31		9.38605		19.3324	b		NA							19.3324			19.3324			19.3324
1973-04-22		9.34298		20.13										20.13			20.13			20.13
1973-04-25	9.2438		22.0689										22.0689			22.0689			22.0689
1973-05-14		9.32825		20.4028										20.4028			20.4028			20.4028
1973-05-23	9.10473		24.3487										24.3487			24.3487			24.3487
1973-06-05		9.34651		20.0647										20.0647			20.0647			20.0647
1973-06-20	9.13091		23.9194										23.9194			23.9194			23.9194
1973-06-27		9.23705		22.0917										22.0917			22.0917			22.0917
1973-07-18	9.10963		24.2684										24.2684			24.2684			24.2684
1973-07-19		9.2677		21.524										21.524			21.524			21.524
1973-08-10		9.12853		24.1014										24.1014			24.1014			24.1014
1973-08-15	9.01731		25.7818										25.7818			25.7818			25.7818
1973-09-01		9.09314		24.7567										24.7567			24.7567			24.7567
1973-09-05	9.04749		25.287										25.287			25.287			25.287
1973-09-23		8.99382		26.596										26.596			26.596			26.596
1973-09-26	9.07549		24.828										24.828			24.828			24.828
1973-10-08		9.11685		24.3176										24.3176			24.3176			24.3176
1973-10-17	9.0835		24.6967										24.6967			24.6967			24.6967
1973-10-23		9.20563		22.6736										22.6736			22.6736			22.6736
1973-11-07		9.1096		24.4518										24.4518			24.4518			24.4518
1973-11-08	9.14826		23.635										23.635			23.635			23.635
1973-11-22		9.13365		24.0064										24.0064			24.0064			24.0064
1973-11-29	9.14662		23.662										23.662			23.662			23.662
1973-12-07		9.30551		20.8238										20.8238			20.8238			20.8238
1973-12-20	9.16839		23.305										23.305			23.305			23.305
1973-12-23		9.35037		19.9932										19.9932			19.9932			19.9932
1974-01-07		9.34238		20.141										20.141			20.141			20.141
1974-01-10	9.1816		23.0886										23.0886			23.0886			23.0886
1974-01-22		9.35898		19.8336										19.8336			19.8336			19.8336
1974-02-01	9.22244		22.4191				NA	1974 warm seasonal min T (NMFS/HadISST)					22.4191			22.4191			22.4191
1974-02-06		9.3595		19.8241				1974 warm seasonal min T (NMFS/HadISST)						19.8241			19.8241			19.8241
1974-02-21		9.3515		19.9722				1974 warm seasonal min T (NMFS/HadISST)						19.9722			19.9722			19.9722
1974-02-22	9.16226		23.4056				NA	1974 warm seasonal min T (NMFS/HadISST)					23.4056			23.4056			23.4056
1974-03-09		9.4113		18.8648	b		NA	1974 warm seasonal min T (NMFS/HadISST)						18.8648			18.8648			18.8648
1974-03-16	9.17244		23.2387				NA	1974 warm seasonal min T (NMFS/HadISST)					23.2387			23.2387			23.2387
1974-03-31		9.36004		19.814										19.814			19.814			19.814
1974-04-07	9.15553		23.5159										23.5159			23.5159			23.5159
1974-04-22		9.36796		19.6675										19.6675			19.6675			19.6675
1974-04-28	9.10444		24.3535										24.3535			24.3535			24.3535
1974-05-14		9.297		20.9815										20.9815			20.9815			20.9815
1974-05-20	9.07445		24.8451										24.8451			24.8451			24.8451
1974-06-05		9.22169		22.3762										22.3762			22.3762			22.3762
1974-06-11	9.07742		24.7964										24.7964			24.7964			24.7964
1974-06-27		9.157		23.5741										23.5741			23.5741			23.5741
1974-07-02	9.10326		24.3728										24.3728			24.3728			24.3728
1974-07-19		9.00942		26.307										26.307			26.307			26.307
1974-07-24	9.06961		24.9244										24.9244			24.9244			24.9244
1974-08-10		9.07179		25.1521										25.1521			25.1521			25.1521
1974-08-15	9.0131		25.8508										25.8508			25.8508			25.8508
1974-09-01		9.09009		24.8132										24.8132			24.8132			24.8132
1974-09-08	9.17569		23.1855										23.1855			23.1855			23.1855
1974-09-23		8.97491		26.9461										26.9461			26.9461			26.9461
1974-10-02	9.0691		24.9328										24.9328			24.9328			24.9328
1974-10-20		9.11887		24.2802										24.2802			24.2802			24.2802
1974-10-26	9.15043		23.5996										23.5996			23.5996			23.5996
1974-11-17		9.03611		25.8128										25.8128			25.8128			25.8128
1974-11-20	9.16197		23.4104										23.4104			23.4104			23.4104
1974-12-14	9.28639		21.3707										21.3707			21.3707			21.3707
1974-12-15		9.16735		23.3824										23.3824			23.3824			23.3824
1975-01-07	9.25914		21.8174										21.8174			21.8174			21.8174
1975-01-12		9.24334		21.9751										21.9751			21.9751			21.9751
1975-02-01	9.29262		21.2686										21.2686			21.2686			21.2686
1975-02-09		9.3263		20.439										20.439			20.439			20.439
1975-03-09		9.33635		20.2527										20.2527			20.2527			20.2527
1975-03-12	9.22902		22.3112										22.3112			22.3112			22.3112
1975-03-24		9.28006		21.2952										21.2952			21.2952			21.2952
1975-04-08		9.22468		22.3207										22.3207			22.3207			22.3207
1975-04-20	9.14631		23.667										23.667			23.667			23.667
1975-04-23		9.28835		21.1416										21.1416			21.1416			21.1416
1975-05-08		9.18305		23.0917										23.0917			23.0917			23.0917
1975-05-24		9.17305		23.2769										23.2769			23.2769			23.2769
1975-05-29	9.14261		23.7277										23.7277			23.7277			23.7277
1975-06-08		9.2108		22.5779										22.5779			22.5779			22.5779
1975-06-23		9.05015		25.5528										25.5528			25.5528			25.5528
1975-07-07	9.1286		23.9574										23.9574			23.9574			23.9574
1975-07-08		9.10377		24.5599										24.5599			24.5599			24.5599
1975-07-24		9.1654		23.4186										23.4186			23.4186			23.4186
1975-08-08		9.05902		25.3884										25.3884			25.3884			25.3884
1975-08-15	9.11045		24.2549										24.2549			24.2549			24.2549
1975-08-23		9.13183		24.0402										24.0402			24.0402			24.0402
1975-09-05	9.12283		24.0519										24.0519			24.0519			24.0519
1975-09-07		9.09564		24.7103										24.7103			24.7103			24.7103
1975-09-23		9.02457		26.0265			dis-org			x	x			26.0265
1975-09-26	9.1607		23.4312										23.4312			23.4312			23.4312
1975-10-04		9.12599		24.1484			dis-org			x	x			24.1484
1975-10-15		9.18713		23.016			dis-org			x	x			23.016
1975-10-17	9.20395		22.7221										22.7221			22.7221			22.7221
1975-10-26		9.11647		24.3247			dis-org			x	x			24.3247
1975-11-06		9.15333		23.642			dis-org			x	x			23.642
1975-11-08	9.19579		22.8559										22.8559			22.8559			22.8559
1975-11-18		9.14329		23.828			dis-org			x	x			23.828
1975-11-29	9.256		21.8688										21.8688			21.8688			21.8688
1975-11-29		9.09668		24.691			dis-org			x	x			24.691
1975-12-10		9.17384		23.2622			dis-org			x	x			23.2622
1975-12-20	9.38321		19.7835										19.7835			19.7835			19.7835
1975-12-21		9.0571		25.424			dis-org			x	x			25.424
1976-01-01		9.25485		21.762			dis-org			x	x			21.762
1976-01-10	9.37701		19.885										19.885			19.885			19.885
1976-01-13		9.37756		19.4897	b		dis-org			x	x			19.4897
1976-01-24		9.39879		19.0965	b		dis-org			x	x			19.0965
1976-02-01	9.4057		19.4148										19.4148			19.4148			19.4148
1976-02-04		9.34392		20.1127			dis-org			x	x			20.1127
1976-02-15		9.44323		18.2735	b		dis-org			x	x			18.2735
1976-02-25	9.30385		21.0844										21.0844			21.0844			21.0844
1976-02-26		9.37689		19.5021	b		dis-org			x	x			19.5021
1976-03-09		9.47302		17.7218	b, g		dis-org			x	x			17.7218
1976-03-21	9.30814		21.0141										21.0141			21.0141			21.0141
1976-03-22		9.36841		19.659			dis-org			x	x			19.659
1976-04-04		9.38076		19.4304	b		dis-org			x	x			19.4304
1976-04-14	9.2053		22.7										22.7			22.7			22.7
1976-04-17		9.37025		19.625			dis-org			x	x			19.625
1976-04-30		9.33726		20.2359			dis-org			x	x			20.2359
1976-05-09	9.0225		25.6968										25.6968			25.6968			25.6968
1976-05-14		9.30919		20.7557			dis-org			x	x			20.7557
1976-05-27		9.24108		22.017			dis-org			x	x			22.017
1976-06-02	9.03248		25.5331										25.5331			25.5331			25.5331
1976-06-09		9.14342		23.8256			dis-org			x	x			23.8256
1976-06-22		9.16896		23.3525			dis-org			x	x			23.3525
1976-06-27	9.03687		25.4612										25.4612			25.4612			25.4612
1976-07-05		8.92488		27.8725			dis-org			x	x			27.8725
1976-07-19		9.05979		25.3742			dis-org			x	x			25.3742
1976-07-21	8.87562		28.1047		a		NA						28.1047			28.1047			28.1047
1976-08-01		9.0613		25.3462			dis-org			x	x			25.3462
1976-08-14		9.03442		25.844			dis-org			x	x			25.844
1976-08-15	8.86205		28.327		a		NA						28.327			28.327			28.327
1976-08-27		8.92696		27.8341			dis-org			x	x			27.8341
1976-09-08	9.06677		24.971										24.971			24.971			24.971
1976-09-09		9.07703		25.055			dis-org			x	x			25.055
1976-09-23		8.89054		28.5085	a		sub-op			x	x			28.5085
1976-10-02	9.18397		23.0497										23.0497			23.0497			23.0497
1976-10-11		9.1142		24.3667			sub-op			x	x			24.3667
1976-10-26	9.17442		23.2062										23.2062			23.2062			23.2062
1976-10-30		9.06929		25.1983			sub-op			x	x			25.1983
1976-11-17		9.18806		22.9989			sub-op			x	x			22.9989
1976-11-20	9.17666		23.1695										23.1695			23.1695			23.1695
1976-12-06		9.1382		23.9223			sub-op			x	x			23.9223
1976-12-14	9.20124		22.7666										22.7666			22.7666			22.7666
1976-12-24		9.21811		22.4425			sub-op			x	x			22.4425
1977-01-07	9.22039		22.4526										22.4526			22.4526			22.4526
1977-01-12		9.21091		22.5758			sub-op			x	x			22.5758
1977-01-30		9.29656		20.9897			sub-op			x	x			20.9897
1977-02-01	9.26571		21.7097										21.7097			21.7097			21.7097
1977-02-18		9.13258		24.0263			sub-op			x	x			24.0263
1977-03-09		9.2987		20.95			sub-op, dis-org			x	x			20.95
1977-03-21	9.23429		22.2247										22.2247			22.2247			22.2247
1977-03-31		9.12659		24.1372			sub-op, dis-org			x	x			24.1372
1977-04-22		9.17079		23.3188			sub-op, dis-org			x	x			23.3188
1977-05-09	9.20971		22.6277										22.6277			22.6277			22.6277
1977-05-14		9.21419		22.515			sub-op, dis-org			x	x			22.515
1977-06-05		9.11037		24.4376			sub-op, dis-org			x	x			24.4376
1977-06-27	9.11604		24.1633										24.1633			24.1633			24.1633
1977-06-27		9.12175		24.2269			sub-op, dis-org			x	x			24.2269
1977-07-19		9.0302		25.9222			sub-op, dis-org			x	x			25.9222
1977-08-10		9.00621		26.3665			sub-op, dis-org			x	x			26.3665
1977-08-15	9.0315		25.5492										25.5492			25.5492			25.5492
1977-09-01		9.1069		24.5018			sub-op, dis-org			x	x			24.5018
1977-09-05	9.11069		24.251										24.251			24.251			24.251
1977-09-23		8.93671		27.6535			sub-op, dis-org			x	x			27.6535
1977-09-26	9.15237		23.5677										23.5677			23.5677			23.5677
1977-10-04		9.04053		25.731			sub-op, dis-org			x	x			25.731
1977-10-16		9.01502		26.2034			sub-op, dis-org			x	x			26.2034
1977-10-17	9.06561		24.99										24.99			24.99			24.99
1977-10-28		9.08273		24.9495			sub-op, dis-org			x	x			24.9495
1977-11-08	9.09613		24.4896										24.4896			24.4896			24.4896
1977-11-09		9.02009		26.1094			sub-op, dis-org			x	x			26.1094
1977-11-21		9.0134		26.2334			sub-op, dis-org			x	x			26.2334
1977-11-29	9.04345		25.3532										25.3532			25.3532			25.3532
1977-12-03		9.0253		26.013			sub-op, dis-org			x	x			26.013
1977-12-15		9.04658		25.619			sub-op, dis-org			x	x			25.619
1977-12-20	9.2472		22.0131										22.0131			22.0131			22.0131
1977-12-27		9.03168		25.8948			sub-op, dis-org			x	x			25.8948
1978-01-08		9.02468		26.0245			sub-op, dis-org			x	x			26.0245
1978-01-10	9.30449		21.0739										21.0739			21.0739			21.0739
1978-01-20		9.05975		25.375			sub-op, dis-org			x	x			25.375
1978-02-01	9.31083		20.97										20.97			20.97			20.97
1978-02-01		9.08917		24.8301			sub-op, dis-org			x	x			24.8301
1978-02-13		9.16937		23.3451			sub-op, dis-org			x	x			23.3451
1978-02-18	9.26006		21.8023										21.8023			21.8023			21.8023
1978-02-25		9.16556		23.4155			sub-op, dis-org			x	x			23.4155
1978-03-08	9.26019		21.8001										21.8001			21.8001			21.8001
1978-03-09		9.17349		23.2686			sub-op, dis-org			x	x			23.2686
1978-03-26	9.31803		20.852										20.852			20.852			20.852
1978-03-31		9.03708		25.7948			sub-op, dis-org			x	x			25.7948
1978-04-12	9.22935		22.3058										22.3058			22.3058			22.3058
1978-04-22		9.09861		24.6553			sub-op, dis-org			x	x			24.6553
1978-04-30	9.2229		22.4114										22.4114			22.4114			22.4114
1978-05-14		9.12531		24.161			sub-op, dis-org			x	x			24.161
1978-05-18	9.22197		22.4267										22.4267			22.4267			22.4267
1978-06-05	9.12821		23.9638										23.9638			23.9638			23.9638
1978-06-05		9.07111		25.1647			sub-op, dis-org			x	x			25.1647
1978-06-22	9.06325		25.0286										25.0286			25.0286			25.0286
1978-06-27		9.04224		25.6993			sub-op, dis-org			x	x			25.6993
1978-07-10	9.07033		24.9126										24.9126			24.9126			24.9126
1978-07-19		9.01071		26.2831			sub-op, dis-org			x	x			26.2831
1978-07-28	9.02807		25.6055										25.6055			25.6055			25.6055
1978-08-10		9.01665		26.1732			sub-op, dis-org			x	x			26.1732
1978-08-15	9.01934		25.7485										25.7485			25.7485			25.7485
1978-09-01		9.06613		25.2568			sub-op, dis-org			x	x			25.2568
1978-09-08	9.04732		25.2898										25.2898			25.2898			25.2898
1978-09-23		8.98863		26.692	h		sub-op, dis-org			x	x			26.692
1978-10-02	9.18269		23.0707										23.0707			23.0707			23.0707
1978-10-26	9.14634		23.6666										23.6666			23.6666			23.6666
1978-10-26		9.00948		26.306			sub-op, dis-org			x	x			26.306
1978-11-20	9.20793		22.6568										22.6568			22.6568			22.6568
1978-11-28		9.06652		25.2497			sub-op, dis-org			x	x			25.2497
1978-12-14	9.27634		21.5353										21.5353			21.5353			21.5353
1979-01-01		9.07389		25.1131			sub-op, dis-org	1979 cold seasonal min T (NMFS/HadISST/ERSST)		x	x			25.1131
1979-01-07	9.33146		20.6319					1979 cold seasonal min T (NMFS/HadISST/ERSST)					20.6319			20.6319			20.6319
1979-02-01	9.3492		20.341					1979 cold seasonal min T (NMFS/HadISST/ERSST)					20.341			20.341			20.341
1979-02-03		9.05691		25.4276			sub-op, dis-org	1979 cold seasonal min T (NMFS/HadISST/ERSST)		x	x			25.4276
1979-02-25	9.29384		21.2486					1979 cold seasonal min T (NMFS/HadISST/ERSST)					21.2486			21.2486			21.2486
1979-03-09		9.08658		24.8782	e		sub-op, dis-org	1979 cold seasonal min T (NMFS/HadISST/ERSST)		x	x			24.8782
1979-03-21	9.31407		20.9169					1979 cold seasonal min T (NMFS/HadISST/ERSST)					20.9169			20.9169			20.9169
1979-03-28		9.07983		25.0032			sub-op, dis-org	1979 cold seasonal min T (NMFS/HadISST/ERSST)		x	x			25.0032
1979-04-15	9.32725		20.7009					1979 cold seasonal min T (NMFS/HadISST/ERSST)					20.7009			20.7009			20.7009
1979-04-17		9.03425		25.8472			sub-op, dis-org	1979 cold seasonal min T (NMFS/HadISST/ERSST)		x	x			25.8472
1979-05-07		8.98046		26.8432			sub-op, dis-org			x	x			26.8432
1979-05-09	9.26456		21.7285										21.7285			21.7285			21.7285
1979-05-27		9.04089		25.7242			sub-op, dis-org			x	x			25.7242
1979-06-02	9.12036		24.0924										24.0924			24.0924			24.0924
1979-06-16		9.00329		26.4206			sub-op, dis-org			x	x			26.4206
1979-06-27	9.06859		24.9411										24.9411			24.9411			24.9411
1979-07-05		9.01359		26.2299			sub-op, dis-org			x	x			26.2299
1979-07-21	9.02034		25.7321										25.7321			25.7321			25.7321
1979-07-25		8.99258		26.6188			sub-op, dis-org			x	x			26.6188
1979-08-14		9.00623		26.3661			sub-op, dis-org			x	x			26.3661
1979-08-15	8.95703		26.7699										26.7699			26.7699			26.7699
1979-09-03		8.9705		27.0277			sub-op, dis-org			x	x			27.0277
1979-09-05	8.99199		26.1969										26.1969			26.1969			26.1969
1979-09-23		8.89252		28.4718	a		sub-op, dis-org	1979 cold seasonal max T (NMFS)		x	x			28.4718
1979-09-26	9.02182		25.7079										25.7079			25.7079			25.7079
1979-10-05		8.92258		27.9153										27.9153			27.9153			27.9153
1979-10-17	8.99976		26.0696										26.0696			26.0696			26.0696
1979-10-18		8.91238		28.1041										28.1041			28.1041			28.1041
1979-10-31		8.92484		27.8733										27.8733			27.8733			27.8733
1979-11-08	9.08515		24.6697										24.6697			24.6697			24.6697
1979-11-13		9.01407		26.221										26.221			26.221			26.221
1979-11-26		9.00917		26.3118										26.3118			26.3118			26.3118
1979-11-29	9.14563		23.6781										23.6781			23.6781			23.6781
1979-12-09		8.95779		27.2631										27.2631			27.2631			27.2631
1979-12-20	9.26799		21.6723										21.6723			21.6723			21.6723
1979-12-22		9.03439		25.8447										25.8447			25.8447			25.8447
1980-01-04		9.03381		25.8554										25.8554			25.8554			25.8554
1980-01-10	9.3415		20.4673										20.4673			20.4673			20.4673
1980-01-17		8.98888		26.6874										26.6874			26.6874			26.6874
1980-01-30		9.20472		22.6905										22.6905			22.6905			22.6905
1980-02-01	9.36374		20.1027										20.1027			20.1027			20.1027
1980-02-12		9.11938		24.2708										24.2708			24.2708			24.2708
1980-02-17	9.3061		21.0475										21.0475			21.0475			21.0475
1980-02-25		9.17913		23.1642										23.1642			23.1642			23.1642
1980-03-04	9.29573		21.2175										21.2175			21.2175			21.2175
1980-03-09		9.26963		21.4884										21.4884			21.4884			21.4884
1980-03-21	9.23317		22.2432										22.2432			22.2432			22.2432
1980-03-31		9.20924		22.6066										22.6066			22.6066			22.6066
1980-04-06	9.21076		22.6106										22.6106			22.6106			22.6106
1980-04-22	9.26102		21.7865										21.7865			21.7865			21.7865
1980-04-22		9.24315		21.9788										21.9788			21.9788			21.9788
1980-05-09	9.18518		23.0299										23.0299			23.0299			23.0299
1980-05-14		9.19878		22.8004										22.8004			22.8004			22.8004
1980-05-25	9.07737		24.7972										24.7972			24.7972			24.7972
1980-06-05		9.19905		22.7954										22.7954			22.7954			22.7954
1980-06-10	9.11634		24.1583										24.1583			24.1583			24.1583
1980-06-27	9.15445		23.5336										23.5336			23.5336			23.5336
1980-06-27		9.06359		25.3039										25.3039			25.3039			25.3039
1980-07-13	9.09743		24.4683										24.4683			24.4683			24.4683
1980-07-19		9.05798		25.4077										25.4077			25.4077			25.4077
1980-07-29	9.06918		24.9316										24.9316			24.9316			24.9316
1980-08-10		9.00732		26.3459										26.3459			26.3459			26.3459
1980-08-15	9.01485		25.8222										25.8222			25.8222			25.8222
1980-09-01		9.01231		26.2535										26.2535			26.2535			26.2535
1980-09-08	9.08554		24.6633										24.6633			24.6633			24.6633
1980-09-23		8.92274		27.9122										27.9122			27.9122			27.9122
1980-10-02	9.2367		22.1853										22.1853			22.1853			22.1853
1980-10-04		9.03588		25.8169										25.8169			25.8169			25.8169
1980-10-15		8.95682		27.2811										27.2811			27.2811			27.2811
1980-10-26	9.19608		22.8512										22.8512			22.8512			22.8512
1980-10-26		9.00222		26.4404										26.4404			26.4404			26.4404
1980-11-06		8.94088		27.5763										27.5763			27.5763			27.5763
1980-11-17		9.11606		24.3323										24.3323			24.3323			24.3323
1980-11-20	9.2092		22.636										22.636			22.636			22.636
1980-11-28		9.03435		25.8454										25.8454			25.8454			25.8454
1980-12-09		9.01009		26.2947										26.2947			26.2947			26.2947
1980-12-14	9.3238		20.7574										20.7574			20.7574			20.7574
1980-12-21		9.18324		23.0881										23.0881			23.0881			23.0881
1981-01-01		9.0974		24.6778										24.6778			24.6778			24.6778
1981-01-07	9.24793		22.0011										22.0011			22.0011			22.0011
1981-01-12		9.14443		23.8069										23.8069			23.8069			23.8069
1981-01-23		9.12927		24.0875										24.0875			24.0875			24.0875
1981-02-01	9.3275		20.6967										20.6967			20.6967			20.6967
1981-02-03		9.29857		20.9523										20.9523			20.9523			20.9523
1981-02-14		9.30818		20.7744										20.7744			20.7744			20.7744
1981-02-20	9.31714		20.8666										20.8666			20.8666			20.8666
1981-02-25		9.26633		21.5494										21.5494			21.5494			21.5494
1981-03-09		9.32305		20.499										20.499			20.499			20.499
1981-03-12	9.26575		21.709										21.709			21.709			21.709
1981-03-26		9.2851		21.2019										21.2019			21.2019			21.2019
1981-03-31	9.22273		22.4143										22.4143			22.4143			22.4143
1981-04-12		9.22737		22.2709										22.2709			22.2709			22.2709
1981-04-20	9.19789		22.8215										22.8215			22.8215			22.8215
1981-04-29		9.21272		22.5422										22.5422			22.5422			22.5422
1981-05-09	9.16884		23.2978										23.2978			23.2978			23.2978
1981-05-16		9.23535		22.1231										22.1231			22.1231			22.1231
1981-05-29	9.09836		24.4531										24.4531			24.4531			24.4531
1981-06-02		9.12366		24.1915										24.1915			24.1915			24.1915
1981-06-17	9.02951		25.5817										25.5817			25.5817			25.5817
1981-06-19		9.03329		25.8649										25.8649			25.8649			25.8649
1981-07-06		9.13431		23.9943										23.9943			23.9943			23.9943
1981-07-07	9.08367		24.6939										24.6939			24.6939			24.6939
1981-07-23		9.02709		25.9798										25.9798			25.9798			25.9798
1981-07-26	8.99082		26.216										26.216			26.216			26.216
1981-08-09		8.99802		26.5182										26.5182			26.5182			26.5182
1981-08-15	8.96636		26.617										26.617			26.617			26.617
1981-08-26		9.11602		24.3329										24.3329			24.3329			24.3329
1981-09-12	9.07755		24.7943										24.7943			24.7943			24.7943
1981-09-13		8.96593		27.1124										27.1124			27.1124			27.1124
1981-10-10	9.12344		24.0419										24.0419			24.0419			24.0419
1981-10-13		9.10985		24.4471										24.4471			24.4471			24.4471
1981-11-08	9.1964		22.8459										22.8459			22.8459			22.8459
1981-11-12		9.14415		23.812										23.812			23.812			23.812
1981-12-06	9.19488		22.8709										22.8709			22.8709			22.8709
1981-12-12		9.19681		22.8369										22.8369			22.8369			22.8369
1982-01-03	9.28005		21.4746										21.4746			21.4746			21.4746
1982-01-11		9.20139		22.7521										22.7521			22.7521			22.7521
1982-02-01	9.29604		21.2125										21.2125			21.2125			21.2125
1982-02-10		9.29147		21.084										21.084			21.084			21.084
1982-03-05	9.26882		21.6587										21.6587			21.6587			21.6587
1982-03-12		9.30231		20.8831										20.8831			20.8831			20.8831
1982-04-07	9.26673		21.6929					El Chichon volcanic eruption (28 March–4 April 1982)					21.6929			21.6929			21.6929
1982-04-11		9.32436		20.4748				El Chichon volcanic eruption (28 March–4 April 1982)						20.4748			20.4748			20.4748
1982-04-26		9.26949		21.491										21.491			21.491			21.491
1982-05-09	9.27668		21.5299										21.5299			21.5299			21.5299
1982-05-11		9.21068		22.58										22.58			22.58			22.58
1982-05-27		9.15655		23.5823										23.5823			23.5823			23.5823
1982-06-11	9.06762		24.957										24.957			24.957			24.957
1982-06-11		9.12882		24.096										24.096			24.096			24.096
1982-06-26		9.04825		25.588										25.588			25.588			25.588
1982-07-12		9.01028		26.2911										26.2911			26.2911			26.2911
1982-07-13	9.19781		22.8228										22.8228			22.8228			22.8228
1982-07-27		9.0091		26.313										26.313			26.313			26.313
1982-08-11		9.02413		26.0346										26.0346			26.0346			26.0346
1982-08-15	8.98269		26.3494										26.3494			26.3494			26.3494
1982-08-27		8.96477		27.1339										27.1339			27.1339			27.1339
1982-09-05	9.00308		26.0151										26.0151			26.0151			26.0151
1982-09-08		9.08024		24.9956										24.9956			24.9956			24.9956
1982-09-21		9.08421		24.922										24.922			24.922			24.922
1982-09-26	9.08452		24.68										24.68			24.68			24.68
1982-10-03		9.11559		24.341										24.341			24.341			24.341
1982-10-16		9.10035		24.6231										24.6231			24.6231			24.6231
1982-10-17	9.12755		23.9745										23.9745			23.9745			23.9745
1982-10-28		9.13445		23.9916										23.9916			23.9916			23.9916
1982-11-08	9.14573		23.6766										23.6766			23.6766			23.6766
1982-11-10		9.17794		23.1862										23.1862			23.1862			23.1862
1982-11-22		9.32402		20.4811										20.4811			20.4811			20.4811
1982-11-29	9.23036		22.2891										22.2891			22.2891			22.2891
1982-12-05		9.31658		20.6189										20.6189			20.6189			20.6189
1982-12-17		9.25379		21.7818										21.7818			21.7818			21.7818
1982-12-20	9.21191		22.5916										22.5916			22.5916			22.5916
1982-12-30		9.29514		21.016										21.016			21.016			21.016
1983-01-10	9.24781		22.0031										22.0031			22.0031			22.0031
1983-01-11		9.33007		20.3691										20.3691			20.3691			20.3691
1983-01-24		9.32385		20.4843										20.4843			20.4843			20.4843
1983-02-01	9.26859		21.6624										21.6624			21.6624			21.6624
1983-02-05		9.28117		21.2746										21.2746			21.2746			21.2746
1983-02-18		9.3473		20.0499										20.0499			20.0499			20.0499
1983-03-07		9.29545		21.0102										21.0102			21.0102			21.0102
1983-03-21	9.16765		23.3173										23.3173			23.3173			23.3173
1983-03-24		9.30601		20.8146										20.8146			20.8146			20.8146
1983-04-10		9.29988		20.9282										20.9282			20.9282			20.9282
1983-04-27		9.32116		20.5341										20.5341			20.5341			20.5341
1983-05-09	9.15728		23.4872										23.4872			23.4872			23.4872
1983-05-14		9.13949		23.8983										23.8983			23.8983			23.8983
1983-05-31		9.27668		21.3577										21.3577			21.3577			21.3577
1983-06-18		9.0824		24.9555										24.9555			24.9555			24.9555
1983-06-27	9.13569		23.8411										23.8411			23.8411			23.8411
1983-07-05		9.17699		23.2039										23.2039			23.2039			23.2039
1983-07-22		9.01581		26.1888										26.1888			26.1888			26.1888
1983-08-08		9.12515		24.1638										24.1638			24.1638			24.1638
1983-08-15	9.12229		24.0608				NA	1982-1983 El Niño			x		24.0608			24.0608
1983-08-25		9.0485		25.5834				1982-1983 El Niño						25.5834			25.5834			25.5834
1983-09-11		9.0242		26.0334				1982-1983 El Niño						26.0334			26.0334			26.0334
1983-09-12	9.15279		23.5609				NA	1982-1983 El Niño			x		23.5609			23.5609
1983-09-29		8.94717		27.4598				1982-1983 El Niño						27.4598			27.4598			27.4598
1983-10-06		9.08225		24.9584				1982-1983 El Niño						24.9584			24.9584			24.9584
1983-10-10	9.17755		23.1549				NA	1982-1983 El Niño			x		23.1549			23.1549
1983-10-13		9.06485		25.2806										25.2806			25.2806			25.2806
1983-10-21		9.02979		25.9298										25.9298			25.9298			25.9298
1983-10-28		8.95822		27.2551										27.2551			27.2551			27.2551
1983-11-05		8.9952		26.5703										26.5703			26.5703			26.5703
1983-11-08	9.15041		23.5999										23.5999			23.5999			23.5999
1983-11-12		9.11686		24.3175										24.3175			24.3175			24.3175
1983-11-20		9.12675		24.1343										24.1343			24.1343			24.1343
1983-11-27		9.21078		22.5782										22.5782			22.5782			22.5782
1983-12-05		9.28764		21.1548										21.1548			21.1548			21.1548
1983-12-06	9.16905		23.2942										23.2942			23.2942			23.2942
1983-12-12		9.3311		20.35										20.35			20.35			20.35
1983-12-20		9.29288		21.0578										21.0578			21.0578			21.0578
1983-12-27		9.33248		20.3244										20.3244			20.3244			20.3244
1984-01-03	9.18664		23.0059										23.0059			23.0059			23.0059
1984-01-04		9.35322		19.9404										19.9404			19.9404			19.9404
1984-01-18		9.22089		22.391										22.391			22.391			22.391
1984-02-01	9.24254		22.0895										22.0895			22.0895			22.0895
1984-02-01		9.29383		21.0401										21.0401			21.0401			21.0401
1984-02-15		9.31784		20.5956										20.5956			20.5956			20.5956
1984-02-29		9.27634		21.3642										21.3642			21.3642			21.3642
1984-03-04	9.18757		22.9906										22.9906			22.9906			22.9906
1984-03-14		9.33892		20.2052										20.2052			20.2052			20.2052
1984-03-28		9.33782		20.2255										20.2255			20.2255			20.2255
1984-04-06	9.22718		22.3412										22.3412			22.3412			22.3412
1984-04-12		9.2783		21.3278										21.3278			21.3278			21.3278
1984-04-26		9.0849		24.9093										24.9093			24.9093			24.9093
1984-05-09	9.17786		23.1498										23.1498			23.1498			23.1498
1984-05-10		9.13165		24.0435										24.0435			24.0435			24.0435
1984-05-24		8.99445		26.5842										26.5842			26.5842			26.5842
1984-06-07		8.90341		28.2702	a		NA	1984 warm seasonal min T (NMFS)						28.2702			28.2702			28.2702
1984-06-10	9.09503		24.5077										24.5077			24.5077			24.5077
1984-06-21		9.0659		25.2611										25.2611			25.2611			25.2611
1984-07-06		9.05792		25.4088										25.4088			25.4088			25.4088
1984-07-13	9.04637		25.3053										25.3053			25.3053			25.3053
1984-07-20		8.96312		27.1644										27.1644			27.1644			27.1644
1984-08-03		8.9219		27.9278										27.9278			27.9278			27.9278
1984-08-15	8.938		27.082				NA	1984 warm seasonal max T (NMFS)					27.082			27.082			27.082
1984-08-17		8.9671		27.0908				1984 warm seasonal max T (NMFS)						27.0908			27.0908			27.0908
1984-08-30	8.96204		26.6878					1984 warm seasonal max T (NMFS)					26.6878			26.6878			26.6878
1984-08-31		8.94759		27.452				1984 warm seasonal max T (NMFS)						27.452			27.452			27.452
1984-09-14	8.99884		26.0846					1984 warm seasonal max T (NMFS)					26.0846			26.0846			26.0846
1984-09-14		9.08927		24.8283				1984 warm seasonal max T (NMFS)						24.8283			24.8283			24.8283
1984-09-29		8.86036		29.0673	a, c, g		NA	1984 warm seasonal max T (NMFS)						29.0673			29.0673			29.0673
1984-09-30	9.02004		25.7371										25.7371			25.7371			25.7371
1984-10-15	9.00231		26.0276										26.0276			26.0276			26.0276
1984-10-16		9.06378		25.3004										25.3004			25.3004			25.3004
1984-10-31	8.9842		26.3246										26.3246			26.3246			26.3246
1984-11-03		9.03268		25.8762										25.8762			25.8762			25.8762
1984-11-15	8.99446		26.1564										26.1564			26.1564			26.1564
1984-11-21		9.15601		23.5924										23.5924			23.5924			23.5924
1984-12-01	9.02613		25.6372										25.6372			25.6372			25.6372
1984-12-09		9.06113		25.3495										25.3495			25.3495			25.3495
1984-12-16	9.15734		23.4863										23.4863			23.4863			23.4863
1984-12-27		9.051		25.5371										25.5371			25.5371			25.5371
1985-01-01	9.2853		21.3885										21.3885			21.3885			21.3885
1985-01-14		9.17		23.3333										23.3333			23.3333			23.3333
1985-01-16	9.31838		20.8462										20.8462			20.8462			20.8462
1985-02-01	9.34548		20.4019										20.4019			20.4019			20.4019
1985-02-01		9.19154		22.9345										22.9345			22.9345			22.9345
1985-02-19		9.05637		25.4376										25.4376			25.4376			25.4376
1985-02-28	9.22281		22.413										22.413			22.413			22.413
1985-03-09		9.20387		22.7062										22.7062			22.7062			22.7062
1985-03-27		9.23874		22.0603										22.0603			22.0603			22.0603
1985-03-28	9.30567		21.0546										21.0546			21.0546			21.0546
1985-04-11		9.2122		22.5518										22.5518			22.5518			22.5518
1985-04-25	9.29555		21.2206										21.2206			21.2206			21.2206
1985-04-27		9.18384		23.077										23.077			23.077			23.077
1985-05-13		9.22374		22.3382										22.3382			22.3382			22.3382
1985-05-23	9.30021		21.1441										21.1441			21.1441			21.1441
1985-05-28		9.12924		24.0882										24.0882			24.0882			24.0882
1985-06-13		9.18135		23.1232										23.1232			23.1232			23.1232
1985-06-20	9.30827		21.012										21.012			21.012			21.012
1985-06-29		9.24771		21.8942										21.8942			21.8942			21.8942
1985-07-15		9.08487		24.9097										24.9097			24.9097			24.9097
1985-07-18	9.0702		24.9147										24.9147			24.9147			24.9147
1985-07-30		9.09676		24.6896										24.6896			24.6896			24.6896
1985-08-15	8.899		27.7214										27.7214			27.7214			27.7214
1985-08-15		9.0844		24.9185										24.9185			24.9185			24.9185
1985-08-31		9.019		26.1296										26.1296			26.1296			26.1296
1985-09-01	8.99185		26.1992										26.1992			26.1992			26.1992
1985-09-16		8.98982		26.67										26.67			26.67			26.67
1985-09-18	8.99078		26.2167										26.2167			26.2167			26.2167
1985-10-05	9.00451		25.9916										25.9916			25.9916			25.9916
1985-10-05		9.13778		23.93										23.93			23.93			23.93
1985-10-22	9.01168		25.8742										25.8742			25.8742			25.8742
1985-10-25		9.14841		23.7332										23.7332			23.7332			23.7332
1985-11-08	9.06901		24.9342										24.9342			24.9342			24.9342
1985-11-14		9.11435		24.3638										24.3638			24.3638			24.3638
1985-11-25	9.23745		22.1729										22.1729			22.1729			22.1729
1985-12-04		9.09453		24.7309										24.7309			24.7309			24.7309
1985-12-12	9.25269		21.9232										21.9232			21.9232			21.9232
1985-12-24		9.18677		23.0227										23.0227			23.0227			23.0227
1985-12-29	9.31416		20.9154										20.9154			20.9154			20.9154
1986-01-13		9.14271		23.8386										23.8386			23.8386			23.8386
1986-01-15	9.33241		20.6162										20.6162			20.6162			20.6162
1986-02-01	9.33548		20.5659										20.5659			20.5659			20.5659
1986-02-02		9.17776		23.1896										23.1896			23.1896			23.1896
1986-02-22		9.31449		20.6575										20.6575			20.6575			20.6575
1986-02-25	9.28208		21.4413										21.4413			21.4413			21.4413
1986-03-02		9.26948		21.491										21.491			21.491			21.491
1986-03-10		9.27556		21.3785										21.3785			21.3785			21.3785
1986-03-19		9.21177		22.5598										22.5598			22.5598			22.5598
1986-03-21	9.26214		21.7683										21.7683			21.7683			21.7683
1986-03-27		9.24413		21.9606										21.9606			21.9606			21.9606
1986-04-05		9.26438		21.5855										21.5855			21.5855			21.5855
1986-04-13		9.29407		21.0358										21.0358			21.0358			21.0358
1986-04-15	9.24406		22.0646										22.0646			22.0646			22.0646
1986-04-21		9.15071		23.6906										23.6906			23.6906			23.6906
1986-04-30		9.22942		22.233										22.233			22.233			22.233
1986-05-08		9.25822		21.6996										21.6996			21.6996			21.6996
1986-05-09	9.07809		24.7854										24.7854			24.7854			24.7854
1986-05-17		9.22125		22.3843										22.3843			22.3843			22.3843
1986-05-25		9.12818		24.1078										24.1078			24.1078			24.1078
1986-06-02	9.01144		25.878					1986-1988 El Niño / Ko'Olina construction (permit approved 1986~)					25.878			25.878			25.878
1986-06-02		9.16677		23.3932				1986-1988 El Niño / Ko'Olina construction (permit approved 1986~)						23.3932			23.3932			23.3932
1986-06-11		9.16176		23.4859				1986-1988 El Niño / Ko'Olina construction (permit approved 1986~)						23.4859			23.4859			23.4859
1986-06-19		9.08102		24.981				1986-1988 El Niño / Ko'Olina construction (permit approved 1986~)						24.981			24.981			24.981
1986-06-27	8.98777		26.266					1986-1988 El Niño / Ko'Olina construction (permit approved 1986~)					26.266			26.266			26.266
1986-06-28		9.06779		25.2261				1986-1988 El Niño / Ko'Olina construction (permit approved 1986~)						25.2261			25.2261			25.2261
1986-07-06		9.07082		25.1701				1986-1988 El Niño / Ko'Olina construction (permit approved 1986~)						25.1701			25.1701			25.1701
1986-07-14		9.01741		26.159				1986-1988 El Niño / Ko'Olina construction (permit approved 1986~)						26.159			26.159			26.159
1986-07-21	9.03317		25.5219					1986-1988 El Niño / Ko'Olina construction (permit approved 1986~)					25.5219			25.5219			25.5219
1986-07-23		8.9823		26.8093				1986-1988 El Niño / Ko'Olina construction (permit approved 1986~)						26.8093			26.8093			26.8093
1986-07-31		8.93061		27.7665				1986-1988 El Niño / Ko'Olina construction (permit approved 1986~)						27.7665			27.7665			27.7665
1986-08-09		8.9702		27.0333				1986-1988 El Niño / Ko'Olina construction (permit approved 1986~)						27.0333			27.0333			27.0333
1986-08-15	8.89139		27.8461					1986-1988 El Niño / Ko'Olina construction (permit approved 1986~)					27.8461			27.8461			27.8461
1986-08-17		8.93973		27.5975				1986-1988 El Niño / Ko'Olina construction (permit approved 1986~)						27.5975			27.5975			27.5975
1986-08-25		8.986		26.7408				1986-1988 El Niño / Ko'Olina construction (permit approved 1986~)						26.7408			26.7408			26.7408
1986-09-03		8.94509		27.4983				1986-1988 El Niño / Ko'Olina construction (permit approved 1986~)						27.4983			27.4983			27.4983
1986-09-05	8.90346		27.6481					1986-1988 El Niño / Ko'Olina construction (permit approved 1986~)					27.6481			27.6481			27.6481
1986-09-11		8.96504		27.129				1986-1988 El Niño / Ko'Olina construction (permit approved 1986~)						27.129			27.129			27.129
1986-09-20		8.9034		28.2704	a		NA	1986-1988 El Niño / Ko'Olina construction (permit approved 1986~)						28.2704			28.2704			28.2704
1986-09-26	8.8968		27.7574					1986-1988 El Niño / Ko'Olina construction (permit approved 1986~)					27.7574			27.7574			27.7574
1986-10-07		8.97347		26.9728				1986-1988 El Niño / Ko'Olina construction (permit approved 1986~)						26.9728			26.9728			26.9728
1986-10-17	8.9505		26.8771					1986-1988 El Niño / Ko'Olina construction (permit approved 1986~)					26.8771			26.8771			26.8771
1986-10-24		8.97326		26.9766				1986-1988 El Niño / Ko'Olina construction (permit approved 1986~)						26.9766			26.9766			26.9766
1986-11-08	9.02457		25.6628					1986-1988 El Niño / Ko'Olina construction (permit approved 1986~)					25.6628			25.6628			25.6628
1986-11-11		8.98829		26.6983				1986-1988 El Niño / Ko'Olina construction (permit approved 1986~)						26.6983			26.6983			26.6983
1986-11-28		9.0316		25.8962				1986-1988 El Niño / Ko'Olina construction (permit approved 1986~)						25.8962			25.8962			25.8962
1986-11-29	9.12897		23.9513					1986-1988 El Niño / Ko'Olina construction (permit approved 1986~)					23.9513			23.9513			23.9513
1986-12-15		9.0376		25.7851				1986-1988 El Niño / Ko'Olina construction (permit approved 1986~)						25.7851			25.7851			25.7851
1986-12-20	9.11183		24.2323					1986-1988 El Niño / Ko'Olina construction (permit approved 1986~)					24.2323			24.2323			24.2323
1987-01-02		9.00802		26.3329				1986-1988 El Niño / Ko'Olina construction (permit approved 1986~)						26.3329			26.3329			26.3329
1987-01-10	9.1265		23.9918					1986-1988 El Niño / Ko'Olina construction (permit approved 1986~)					23.9918			23.9918			23.9918
1987-01-19		9.04211		25.7016				1986-1988 El Niño / Ko'Olina construction (permit approved 1986~)						25.7016			25.7016			25.7016
1987-02-01	9.21587		22.5267					1986-1988 El Niño / Ko'Olina construction (permit approved 1986~)					22.5267			22.5267			22.5267
1987-02-05		9.12769		24.1168				1986-1988 El Niño / Ko'Olina construction (permit approved 1986~)						24.1168			24.1168			24.1168
1987-02-23		9.12783		24.1143				1986-1988 El Niño / Ko'Olina construction (permit approved 1986~)						24.1143			24.1143			24.1143
1987-02-28	9.19146		22.9269					1986-1988 El Niño / Ko'Olina construction (permit approved 1986~)					22.9269			22.9269			22.9269
1987-03-12		9.13153		24.0458				1986-1988 El Niño / Ko'Olina construction (permit approved 1986~)						24.0458			24.0458			24.0458
1987-03-28	9.18313		23.0634					1986-1988 El Niño / Ko'Olina construction (permit approved 1986~)					23.0634			23.0634			23.0634
1987-03-30		9.2907		21.0982				1986-1988 El Niño / Ko'Olina construction (permit approved 1986~)						21.0982			21.0982			21.0982
1987-04-12		9.25413		21.7753				1986-1988 El Niño / Ko'Olina construction (permit approved 1986~)						21.7753			21.7753			21.7753
1987-04-25	9.18117		23.0955					1986-1988 El Niño / Ko'Olina construction (permit approved 1986~)					23.0955			23.0955			23.0955
1987-04-25		9.23078		22.2078				1986-1988 El Niño / Ko'Olina construction (permit approved 1986~)						22.2078			22.2078			22.2078
1987-05-09		9.16347		23.4543				1986-1988 El Niño / Ko'Olina construction (permit approved 1986~)						23.4543			23.4543			23.4543
1987-05-22		9.14358		23.8227				1986-1988 El Niño / Ko'Olina construction (permit approved 1986~)						23.8227			23.8227			23.8227
1987-05-23	9.18016		23.1122					1986-1988 El Niño / Ko'Olina construction (permit approved 1986~)					23.1122			23.1122			23.1122
1987-06-05		9.11859		24.2854				1986-1988 El Niño / Ko'Olina construction (permit approved 1986~)						24.2854			24.2854			24.2854
1987-06-18		9.07047		25.1765				1986-1988 El Niño / Ko'Olina construction (permit approved 1986~)						25.1765			25.1765			25.1765
1987-06-20	8.95603		26.7865					1986-1988 El Niño / Ko'Olina construction (permit approved 1986~)					26.7865			26.7865			26.7865
1987-07-01		9.12093		24.2421				1986-1988 El Niño / Ko'Olina construction (permit approved 1986~)						24.2421			24.2421			24.2421
1987-07-15		9.1055		24.5278				1986-1988 El Niño / Ko'Olina construction (permit approved 1986~)						24.5278			24.5278			24.5278
1987-07-18	8.90346		27.6481					1986-1988 El Niño / Ko'Olina construction (permit approved 1986~)					27.6481			27.6481			27.6481
1987-07-28		9.08066		24.9877			NA	1986-1988 El Niño / Ko'Olina construction (permit approved 1986~), 1987 warm seasonal max T (NMFS/AVHRR)			x			24.9877			24.9877			24.9877
1987-08-11		9.13665		23.951			NA	1986-1988 El Niño / Ko'Olina construction (permit approved 1986~), 1987 warm seasonal max T (NMFS/AVHRR)			x			23.951			23.951			23.951
1987-08-15	8.86682		28.2489		a		NA	1986-1988 El Niño / Ko'Olina construction (permit approved 1986~), 1987 warm seasonal max T (NMFS/AVHRR)					28.2489			28.2489			28.2489
1987-08-24		9.15819		23.5521			NA	1986-1988 El Niño / Ko'Olina construction (permit approved 1986~), 1987 warm seasonal max T (NMFS/AVHRR)			x			23.5521			23.5521			23.5521
1987-09-07		9.03421		25.8479			NA	1986-1988 El Niño / Ko'Olina construction (permit approved 1986~), 1987 warm seasonal max T (NMFS/AVHRR)			x			25.8479			25.8479			25.8479
1987-09-12	8.91108		27.5232					1986-1988 El Niño / Ko'Olina construction (permit approved 1986~), 1987 warm seasonal max T (NMFS/AVHRR)					27.5232			27.5232			27.5232
1987-09-27		9.07661		25.0627			NA	1986-1988 El Niño / Ko'Olina construction (permit approved 1986~), 1987 warm seasonal max T (NMFS/AVHRR)			x			25.0627			25.0627			25.0627
1987-10-10	8.97649		26.451					1986-1988 El Niño / Ko'Olina construction (permit approved 1986~)					26.451			26.451			26.451
1987-10-17		9.12261		24.2109				1986-1988 El Niño / Ko'Olina construction (permit approved 1986~)						24.2109			24.2109			24.2109
1987-11-06		9.15381		23.6332				1986-1988 El Niño / Ko'Olina construction (permit approved 1986~)						23.6332			23.6332			23.6332
1987-11-08	8.97672		26.4472					1986-1988 El Niño / Ko'Olina construction (permit approved 1986~)					26.4472			26.4472			26.4472
[truncated: 1,377 more rows]

## Sheet: notes
		MP	KO	MP	KO
Codes	1Type of outliers:	Threshold	Threshold	Time period	Time period
a	>2σ warmer than average	>28.06℃	>28.18℃	1919-2015	1957-2019
b	>2σ cooler than average. SEM checked parts.	<18.05℃	<19.61℃	1919-2015	1957-2019
c	Annual Tmax >2σ warmer than average annual Tmax (>29.16℃)	>29.16℃	>29.03℃	1908-2019	1957-2019
d	Annual Tmax >2σ cooler than average annual Tmax for (<22.01℃)	<22.01℃	<24.05℃	1908-2019	1957-2019
e	Annual Tmin >2σ warmer than average annual Tmin for (>24.35℃)	>24.35℃	>26.34℃	1908-2019	1957-2019
f	Annual Tmin >2σ cooler than average annual Tmin for (<15.85℃)	<15.85℃	<17.65℃	1908-2019	1957-2019
g	Annual Tamp >2σ larger than average annual Tamp (>9.0℃)	>9.0℃	>8.95℃	1908-2019	1957-2019
h	Annual Tamp >2σ smaller than average annual Tamp (<1.9℃)	<1.9℃	<3.33℃	1908-2019	1957-2019
	2SEM checked diagenesis
D	skeletal dissolution was found
SA	secondary aragonite was found
NA	no anomalies
	3Transect quality
dis-org	Disorganized corallite with unclear fans, small fans, merging or terminating fans
sub-op	Suboptimal transect (corallite alignment perpendicular slab)
pores	pores were found nearby
NA	no anomalies
x (column J)	5Removed values for trend analyasis for a scenario (a). Values including anomalous values (code a~h) and associated with diagenesis (SA or D).
x (column K)	6Removed values for a scenario (b). Values including anomalous values (code a~h) and associated with diagenesis and problematic transect (sub-op or dis-org)
x (column L)	7Removed values for a scenario (c). Values including anomalous values (code a~h) and associated with diagenesis and problematic transect (sub-op or dis-org), and htermal stress (where anomalies maybe associated with temporal warm events)
